# Supplementary material for: Divergent Fe-Mediated C–H Activation Paths Driven by Alkali Cations
Source: PubMed Central journal article supplement — JACS Au. 2024 Jan 19;4(2):512–24. doi: 10.1021/jacsau.3c00649 (PMC10900209; doi:10.1021/jacsau.3c00649), 2024-01-19
Supplement: au3c00649_si_002.pdf [file au3c00649_si_002.pdf]

## Supporting Information

# Divergent Fe-mediated C-H Activation paths driven by Alkali Cations

*Vincent Wowk,<sup>[a]</sup> Alexis K. Bauer,<sup>[b]</sup> Aleksa Radovic,<sup>[b]</sup> Lise-Marie Chamoreau,<sup>[c]</sup> Michael L. Neidig,<sup>\*[d]</sup> and Guillaume Lefèvre<sup>\*[a]</sup>*

[a] Chimie ParisTech, PSL University, CNRS, Institute of Chemistry for Life and Health Sciences, CSB2D, 75005 Paris, France

[b] Department of Chemistry, University of Rochester, Rochester, NY, 14627, USA

[c] Sorbonne Université, CNRS, Institut Parisien de Chimie Moléculaire, F-75252, Paris, France

[d] Inorganic Chemistry Laboratory, Department of Chemistry, University of Oxford, South Parks Road, Oxford OX1 3QR, United Kingdom

E-mail: [guillaume.lefevre@chimieparistech.psl.eu](mailto:guillaume.lefevre@chimieparistech.psl.eu) ; [michael.neidig@chem.ox.ac.uk](mailto:michael.neidig@chem.ox.ac.uk)

## *Table of Contents.*

|                                                                                                                                                |           |
|------------------------------------------------------------------------------------------------------------------------------------------------|-----------|
| <b>1) General information .....</b>                                                                                                            | <b>3</b>  |
| <b>2) Preparation of the iron complexes: Fe(Cl)<sub>2</sub>(dmpe)<sub>2</sub> and FeBr(C<sub>6</sub>H<sub>5</sub>)(dmpe)<sub>2</sub> .....</b> | <b>4</b>  |
| a) Fe(Cl) <sub>2</sub> (dmpe) <sub>2</sub> (1).....                                                                                            | 4         |
| b) FeBr(C <sub>6</sub> H <sub>5</sub> )(dmpe) <sub>2</sub> (2 <sub>Ph</sub> ) .....                                                            | 4         |
| <b>3) Speciation of the iron-containing species upon treatment of Fe(Cl)<sub>2</sub>(dmpe)<sub>2</sub> by M(hmde) (M = Li, Na, K) .....</b>    | <b>14</b> |
| <b>4) Catalytic applications .....</b>                                                                                                         | <b>44</b> |
| a) General procedure for cross-coupling reactions with <i>n</i> -C <sub>12</sub> H <sub>25</sub> I and iodocyclohexane.....                    | 44        |
| b) General procedure for cross-coupling reactions with radical clock: Br(CH <sub>2</sub> ) <sub>4</sub> CH=CH <sub>2</sub> .....               | 46        |
| c) General procedure for cross-coupling reactions with 2 <sub>Ph</sub> and <i>n</i> -C <sub>12</sub> H <sub>25</sub> I.....                    | 47        |
| <b>5) C-H / B-H bond metathesis: reductive dehydrocoupling .....</b>                                                                           | <b>49</b> |
| a) General procedure for borylation of C-H bonds .....                                                                                         | 49        |
| b) <sup>11</sup> B, <sup>31</sup> P{ <sup>1</sup> H} and <sup>1</sup> H NMR data for borylation experiments.....                               | 49        |
| <b>6) Crystallography.....</b>                                                                                                                 | <b>69</b> |
| <b>7) Mössbauer spectroscopy.....</b>                                                                                                          | <b>76</b> |
| <b>8) References .....</b>                                                                                                                     | <b>76</b> |

## 1) General information

All the samples were prepared in a Jacomex Campus glovebox under inert atmosphere of argon and vacuum Schlenk lines. Glassware was dried overnight at 120 °C before use. Deuterated solvents were thoroughly degassed by Freeze-Thaw cycles and dried overnight on 4Å molecular sieves. Non-deuterated solvents were dried over a Na/benzophenone mixture and distilled before use. NMR tubes equipped with a J. Young valve were used for all  $^1\text{H}$  NMR,  $^{31}\text{P}$  NMR and  $^{11}\text{B}$  NMR experiments. Chemicals were obtained from commercial sources and used as purchased, unless specified otherwise or after drying when necessary. A modified synthesis from the literature was applied for the synthesis of  $\text{Fe}(\text{Cl})_2(\text{dmpe})_2$ .

NMR spectra were recorded using a Bruker Avance III HD 400 MHz spectrometer. Chemical shifts ( $\delta$ ) are given in ppm and coupling constants ( $J$ ) in Hz. The peak patterns are indicated as follow: (s, singlet; d, doublet; t, triplet; q, quartet; quin, quintet; m, multiplet, and br, for broad). Chemical shifts for  $^1\text{H}$  NMR spectra were referenced using the residual solvent signal as internal standard ( $^1\text{H}$ :  $\text{CDCl}_3 = 7.26$  ppm, THF-d8 = 3.58 ppm, 1.72 ppm and  $\text{C}_6\text{D}_6 = 7.16$  ppm).  $^{31}\text{P}$  NMR (162 MHz) spectra were referenced against external 85 %  $\text{H}_3\text{PO}_4$  standard and  $^{11}\text{B}$  NMR (128 MHz) spectra against external  $\text{BF}_3 \cdot \text{OEt}_2$ .

A Thorlabs' M365LP1 LED (nominal wavelength = 365 nm, FWHM = 9 nm) mounted to the end of a 57 mm heat sink enabling heat dissipation has been used for irradiation setup.

Low-resolution (LRMS) analysis were performed on GCMS-QP2010 SE device, equipped with AOC-20i injector, AOC-20s autosampler (Shimadzu Corporation) and electronic impact ionization technology (70 eV). Compounds were eluted on a ZB-5MS capillary column (length = 20 m ; intern diameter = 0.18 mm ; film thickness = 0.18  $\mu\text{m}$  ; nature of the stationary phase = 5 % phenylarylene, 95 % dimethylpolysiloxane) using helium as carrier gas. Chromatograms were processed using LabSolutions software with GCMSsolution package v 4.52 (Shimadzu Corporation).

Elemental analyses were recorded in sealed tin capsules, prepared in a glovebox, by the analytical facilities of the Laboratoire de Chimie de Coordination (Isabelle Borget, Toulouse, France).

## 2) Preparation of the iron complexes: $\text{Fe}(\text{Cl})_2(\text{dmpe})_2$ and $\text{FeBr}(\text{C}_6\text{H}_5)(\text{dmpe})_2$

### a) $\text{Fe}(\text{Cl})_2(\text{dmpe})_2$ (1)

$\text{Fe}(\text{Cl})_2(\text{dmpe})_2$  was prepared according to the synthesis described by Chatt and Hayter<sup>[R1]</sup> but with some modification:

In an argon-filled glovebox, a 50 mL flask fitted with a J. Young valve was charged with anhydrous  $\text{FeCl}_2$  finely ground (160 mg, 1.26 mmol, 1 equiv.). The flask was attached to the Schlenk line and anhydrous EtOH (15 mL) was added. The mixture was heated at 40 °C until  $\text{FeCl}_2$  was completely dissolved, the color changed to yellow/orange. To the stirred mixture a solution of dmpe (420  $\mu\text{L}$ , 2.52 mmol, 2 equiv.) in toluene (3 mL) (previously prepared in the glovebox) was added dropwise, the color change instantly to dark purple. The reaction mixture was stirred overnight at 40 °C, EtOH was removed under vacuum and the crude residue was dissolved in THF. The dark solution was filtered through a Pasteur pipette charged with Celite<sup>®</sup> 545 and glass wool. The resulting dark green solution was evaporated to dryness to afford an emerald-green powder (501 mg, 1.17 mmol, 93 %).  $^1\text{H}$  NMR (400 MHz, THF-d8):  $\delta = 2.21$  (quin, 8H,  $-\text{CH}_2\text{CH}_2-$ ), 1.45 (quin, 24H,  $-\text{CH}_3$ ).  $^{31}\text{P}\{^1\text{H}\}$  NMR (162 MHz, THF-d8):  $\delta = 59.34$  (s, 4P).

### b) $\text{FeBr}(\text{C}_6\text{H}_5)(\text{dmpe})_2$ (2Ph')

In an argon-filled glovebox, a 50 mL flask fitted with a J. Young valve was charged with  $\text{FeCl}_2(\text{dmpe})_2$  (80.1 mg, 187.6  $\mu\text{mol}$ , 1 equiv.) and  $\text{C}_6\text{H}_6$  (2 mL). The mixture was cooled at -30 °C and a 1M solution of PhMgBr in THF (93.8  $\mu\text{L}$ , 93.8  $\mu\text{mol}$ , 0.5 equiv.) was added dropwise. The reaction mixture was vigorously shaken and left 1 h at room temperature. The color gradually turned yellow/orange. The same process was repeated to a total of 1 equiv. of PhMgBr. The flask was left at room temperature overnight. The dark solution was filtered through a Pasteur pipette charged with Celite<sup>®</sup> 545 and glass wool. The resulting dark pink/red solution was concentrated (ca. 0.5 mL) and was layered with 2 mL of *n*-pentane. This was placed in the glovebox freezer at -35 °C for 3 days. The solution was evaporated to dryness to afford red crystals (51.7 mg, 100.8  $\mu\text{mol}$ , 54 %).  $^1\text{H}$  NMR (400 MHz,  $\text{C}_6\text{D}_6$ ):  $\delta = 6.81$  (d, 2H, *o*- $H_{\text{Ar}}$ ,  $J(^1\text{H}-^1\text{H}) = 7.4$  Hz), 6.71 (t, 1H, *p*- $H_{\text{Ar}}$ ,  $J(^1\text{H}-^1\text{H}) = 6.8$  Hz), 6.63 (t, 2H, *m*- $H_{\text{Ar}}$ ,  $J(^1\text{H}-^1\text{H}) = 7.2$  Hz), 1.85 (br, 8H,  $-\text{CH}_2\text{CH}_2-$ ), 1.56 (s, 12H,  $-\text{CH}_3$ ), 1.11 (s, 12H,  $-\text{CH}_3$ ).  $^{31}\text{P}\{^1\text{H}\}$  NMR (162 MHz,  $\text{C}_6\text{D}_6$ ):  $\delta = 67.12$  (s, 4P).

Anal. Calcd. For  $C_{18}H_{37}BrFeP_4$  ( $513.14 \text{ g}\cdot\text{mol}^{-1}$ ): C, 42.13; H, 7.27; Found: C, 41.19; H, 7.03.

The same procedure was applied for the synthesis of  $^{57}\text{FeBr}(\text{C}_6\text{H}_5)(\text{dmpe})_2$  ( $^{57}\text{Fe-2Ph}$ ).

$^1\text{H}$  NMR (400 MHz,  $\text{C}_6\text{D}_6$ ):  $\delta = 6.80$  (d, 2H,  $o\text{-H}_{\text{Ar}}$ ,  $J(^1\text{H-}^1\text{H}) = 7.4 \text{ Hz}$ ),  $6.70$  (t, 1H,  $p\text{-H}_{\text{Ar}}$ ,  $J(^1\text{H-}^1\text{H}) = 7.0 \text{ Hz}$ ,  $J(^1\text{H}_{\text{para}}\text{-}^{57}\text{Fe}) = 3 \text{ Hz}$ ),  $6.61$  (t, 2H,  $m\text{-H}_{\text{Ar}}$ ,  $J(^1\text{H-}^1\text{H}) = 7.2 \text{ Hz}$ ,  $J(^1\text{H}_{\text{meta}}\text{-}^{57}\text{Fe}) = 4 \text{ Hz}$ ),  $1.86$  (br, 8H,  $-\text{CH}_2\text{CH}_2-$ ),  $1.55$  (s, 12H,  $-\text{CH}_3$ ),  $1.11$  (s, 12H,  $-\text{CH}_3$ ).

$^{31}\text{P}\{^1\text{H}\}$  NMR (162 MHz,  $\text{C}_6\text{D}_6$ ):  $\delta = 67.16$  (d, 4P,  $J(^{31}\text{P-}^{57}\text{Fe}) = 42 \text{ Hz}$ ).

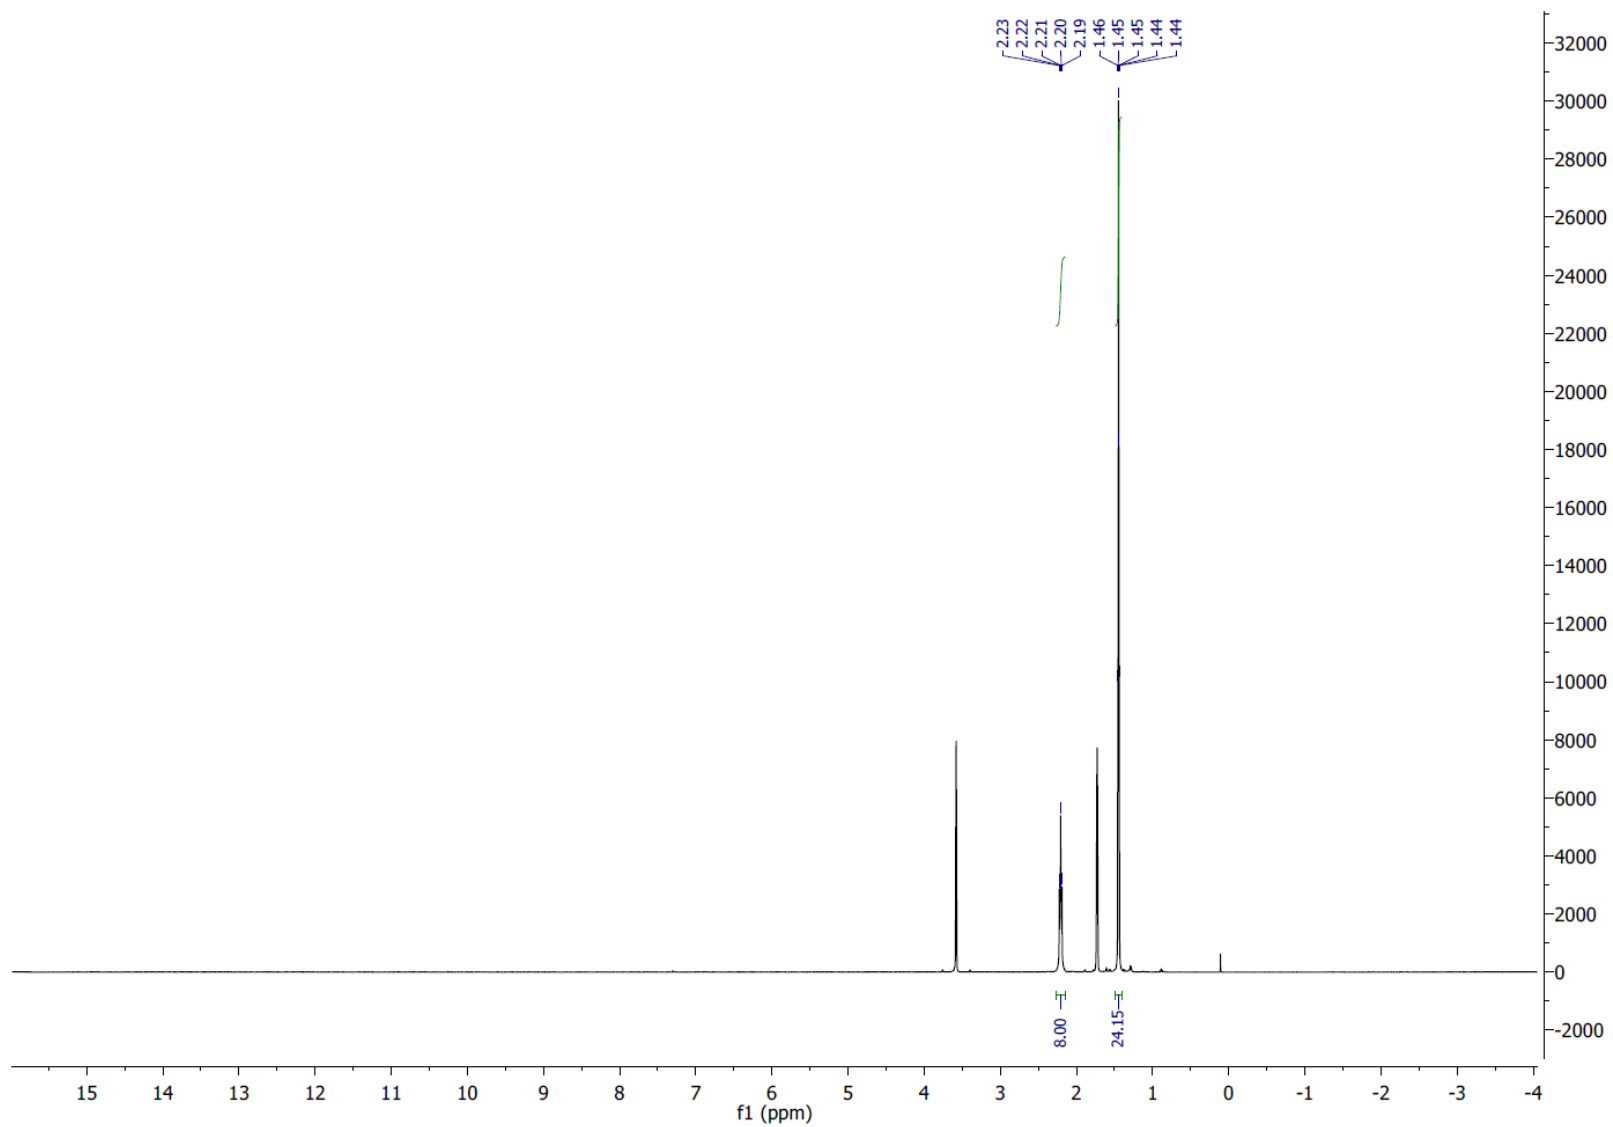

**Figure S1:**  $^1\text{H}$  NMR (400 MHz, 298 K, THF- $d_8$ ) of  $\text{Fe}(\text{Cl})_2(\text{dmpe})_2$  (**1**).

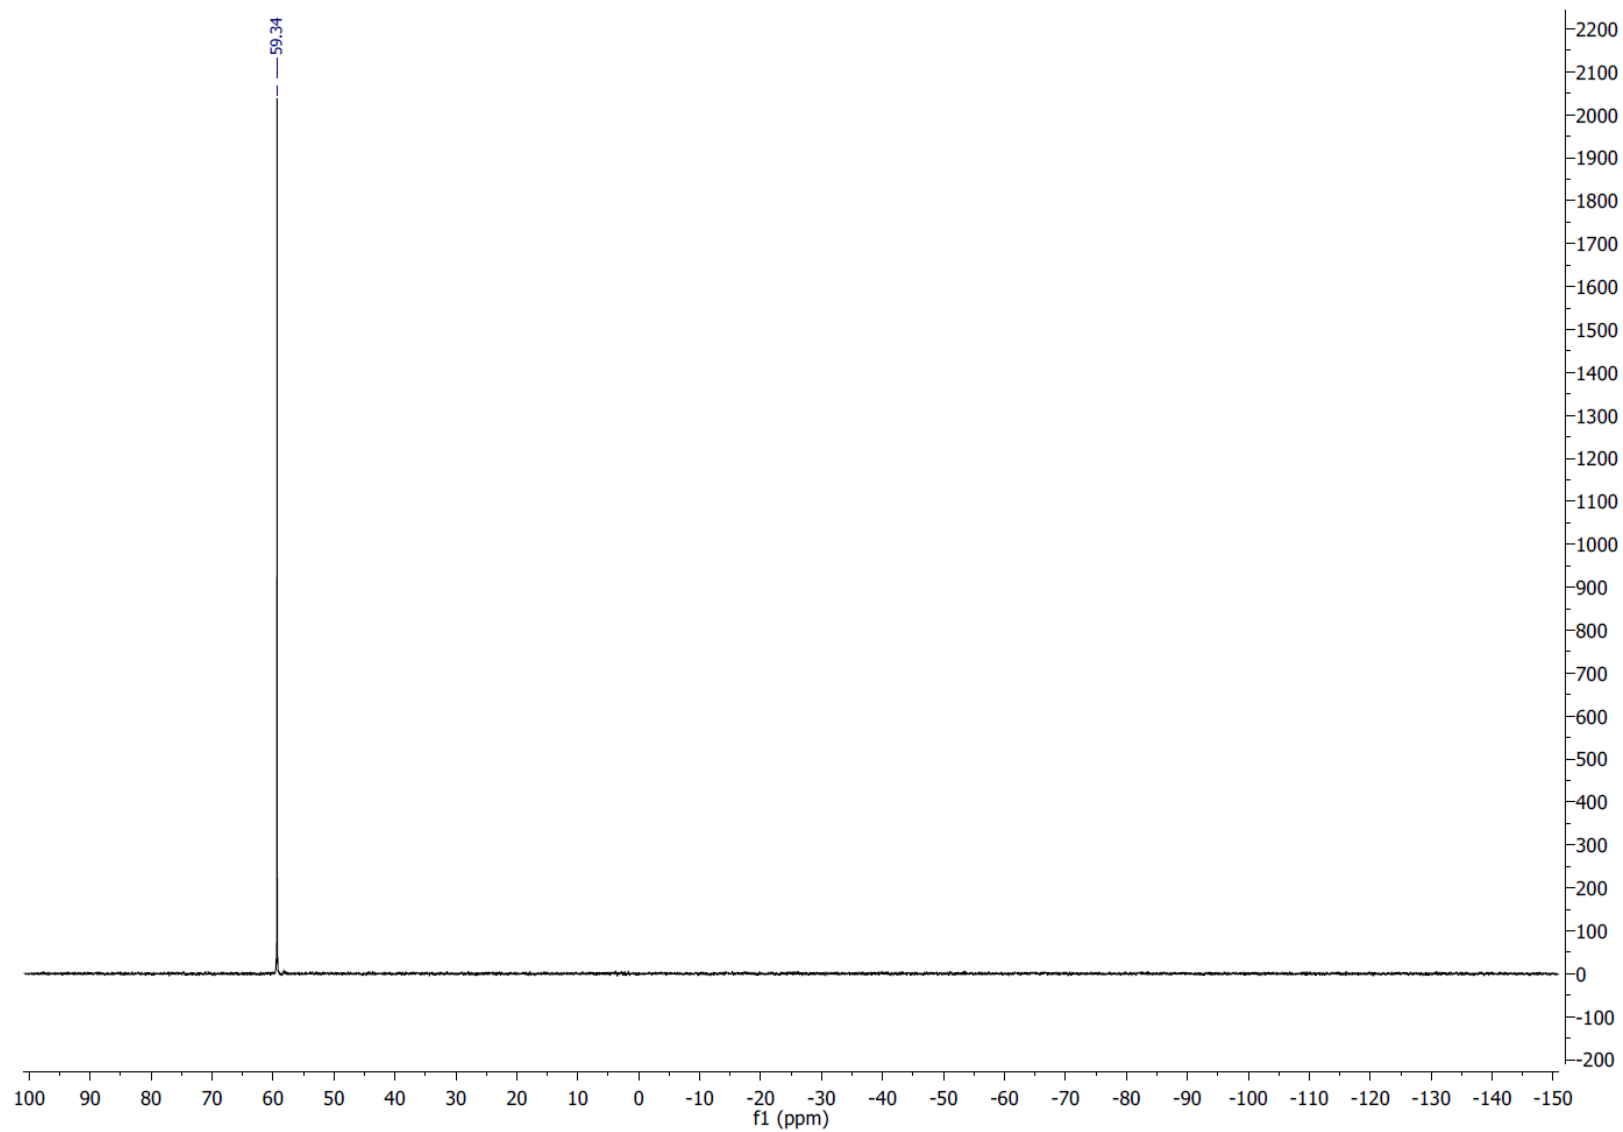

**Figure S2:**  $^{31}\text{P}\{^1\text{H}\}$  NMR (162 MHz, 298 K, THF-d8) of  $\text{Fe}(\text{Cl})_2(\text{dmpe})_2$  (**1**).

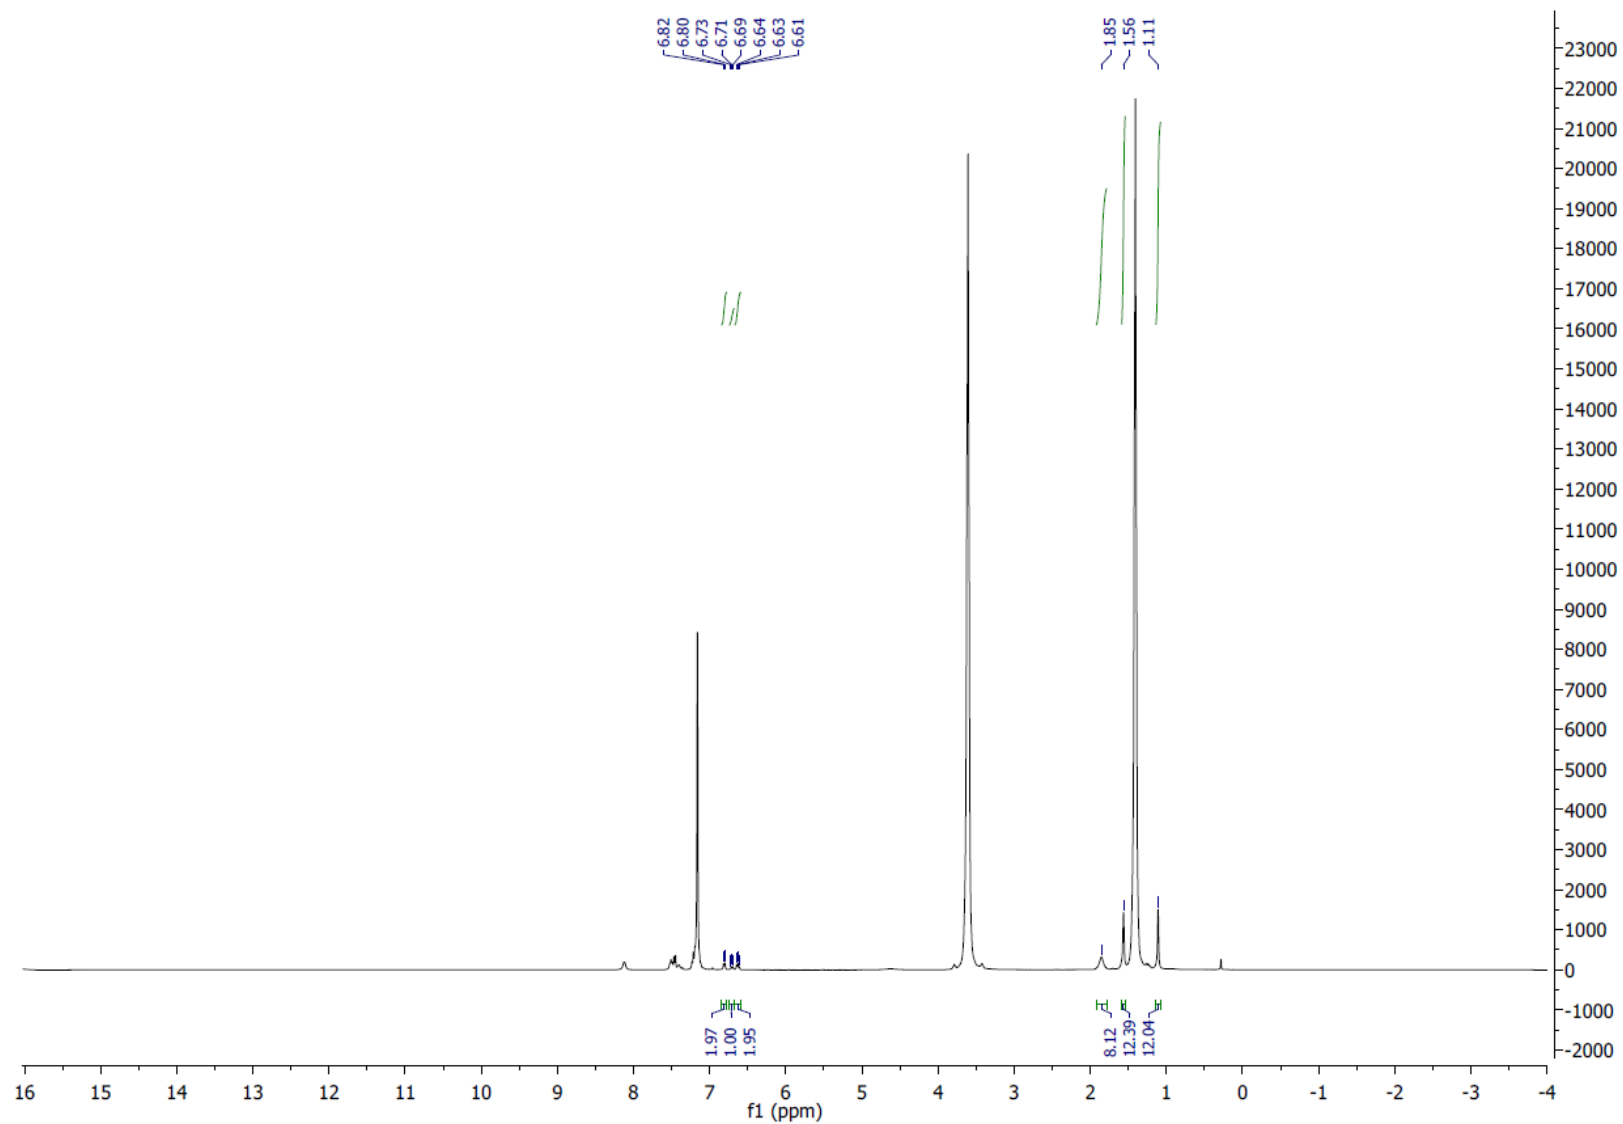

**Figure S3:**  $^1\text{H}$  NMR (400 MHz, 298 K,  $\text{C}_6\text{D}_6$ ) of  $\text{FeBr}(\text{C}_6\text{H}_5)(\text{dmpe})_2$  ( $2\text{Ph}^+$ ).



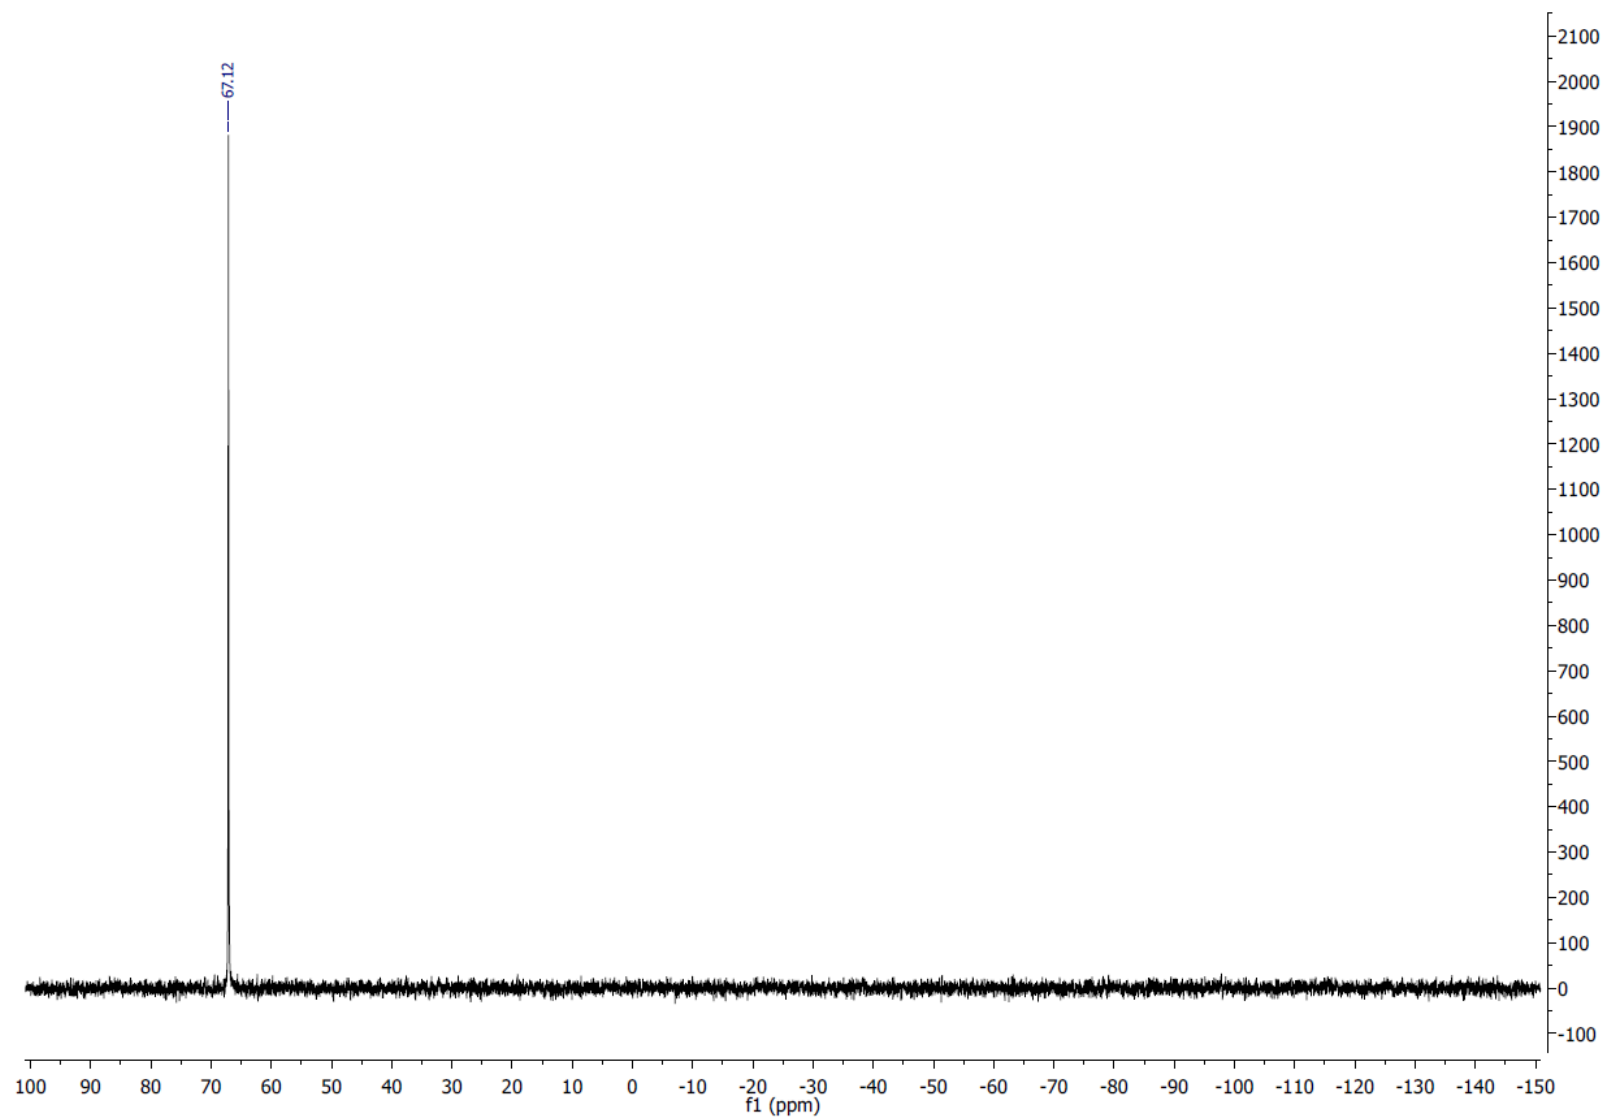

**Figure S4:**  $^{31}\text{P}\{^1\text{H}\}$  NMR (400 MHz, 298 K,  $\text{C}_6\text{D}_6$ ) of  $\text{FeBr}(\text{C}_6\text{H}_5)(\text{dmpe})_2$  (**2Ph**).

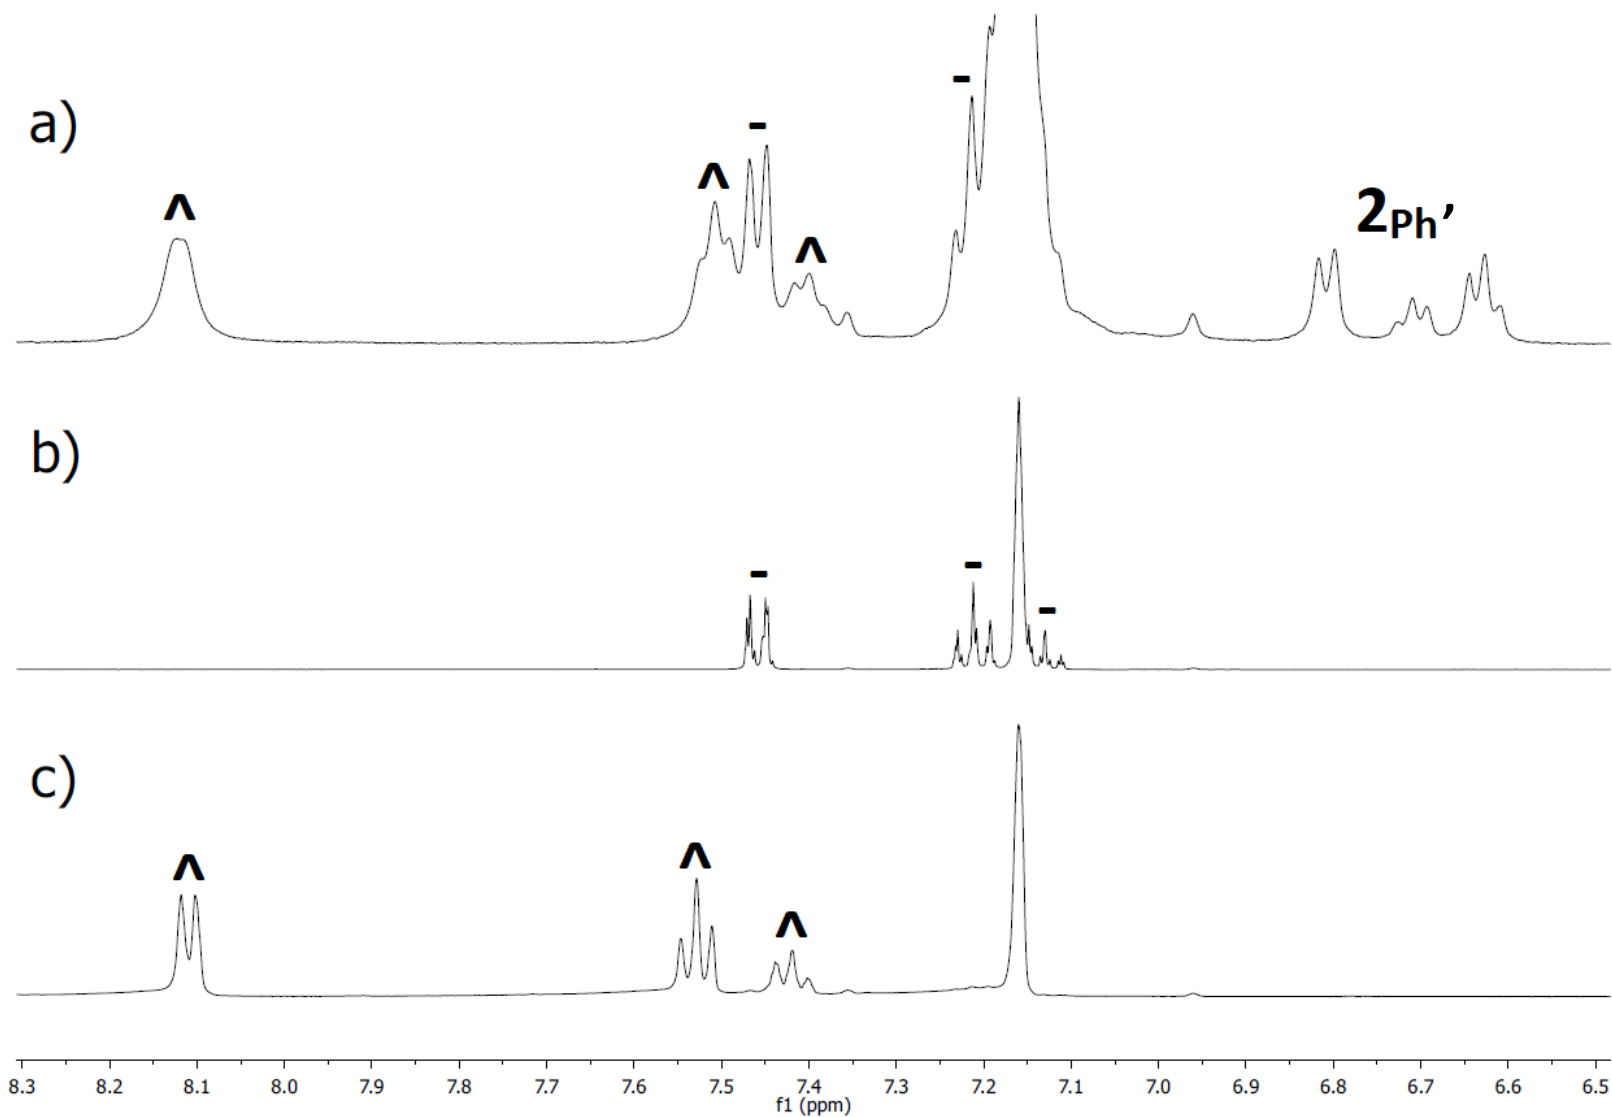

**Figure S5:** <sup>1</sup>H NMR (400 MHz, 298 K, C<sub>6</sub>D<sub>6</sub>) of FeCl<sub>2</sub>(dmpe)<sub>2</sub> (**1**) treated by 1 equiv. of PhMgBr after one night at 20 °C (a), 1,1'-Biphenyl (-) (b) and a 1M solution of PhMgBr (^) in THF (c).

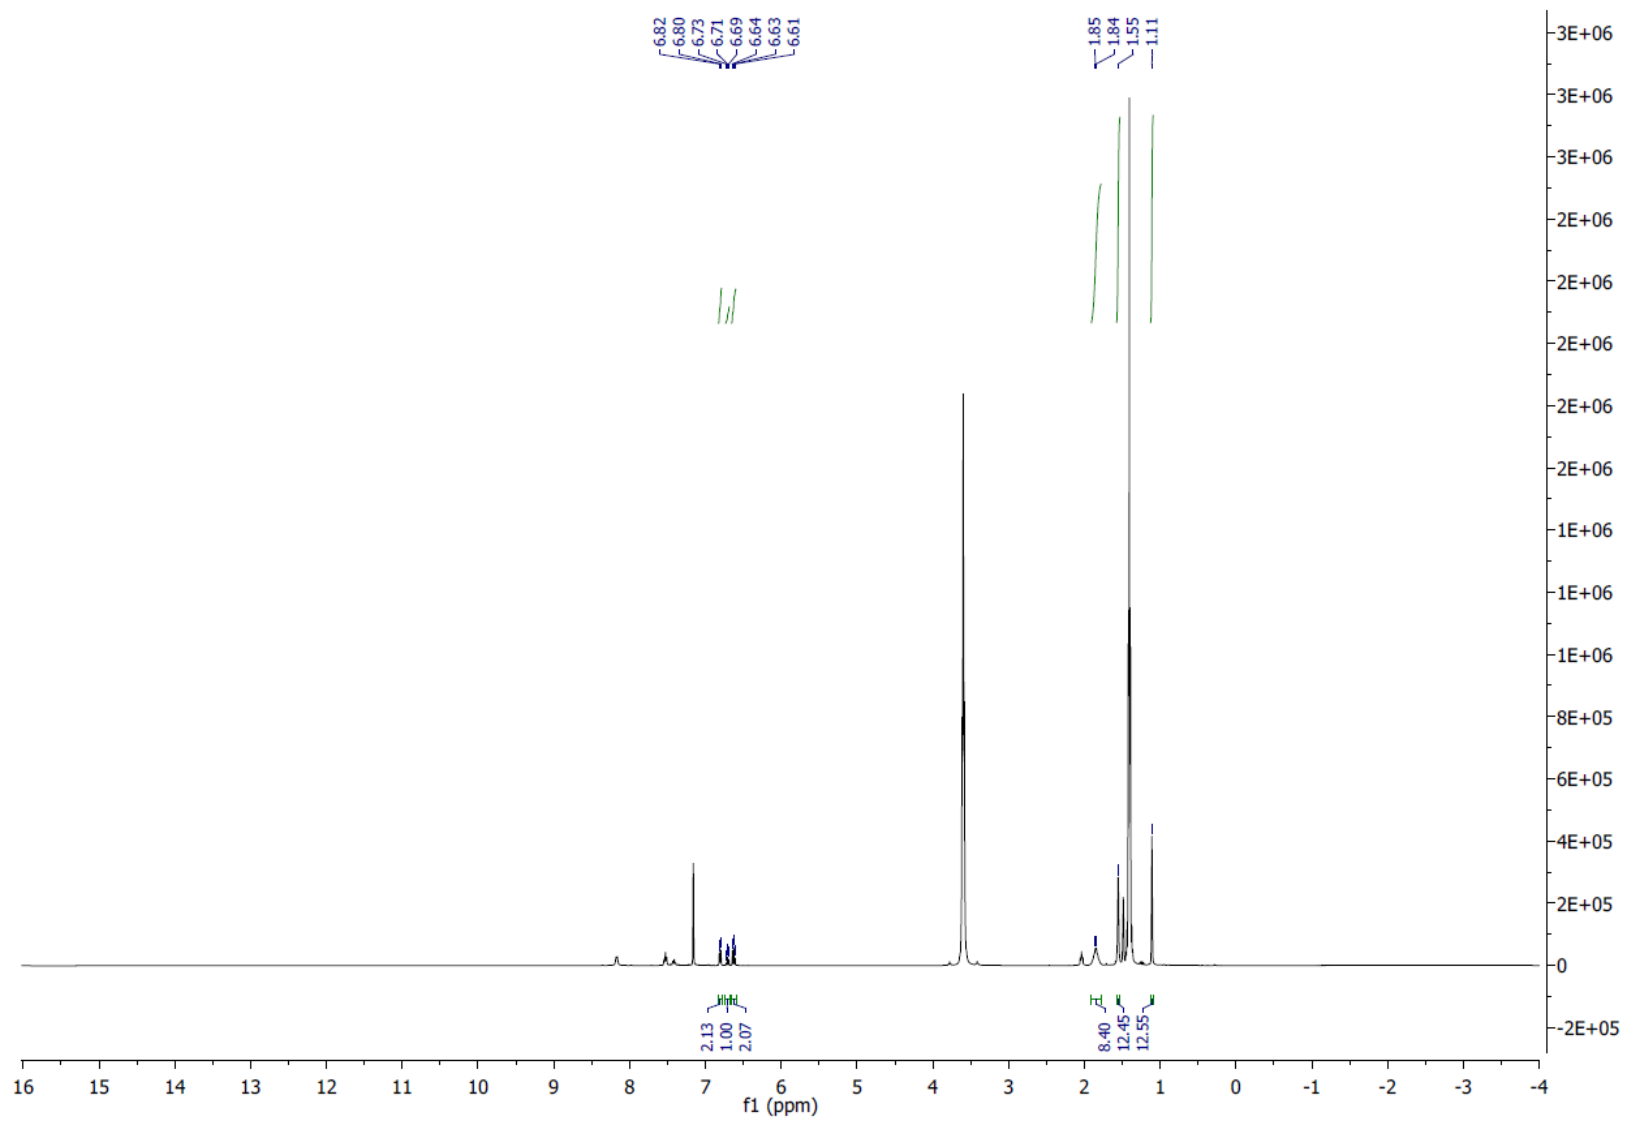

**Figure S6:** <sup>1</sup>H NMR (400 MHz, 298 K, C<sub>6</sub>D<sub>6</sub>) of <sup>57</sup>FeBr(C<sub>6</sub>H<sub>5</sub>)(dmpe)<sub>2</sub> (<sup>57</sup>Fe-2Ph).

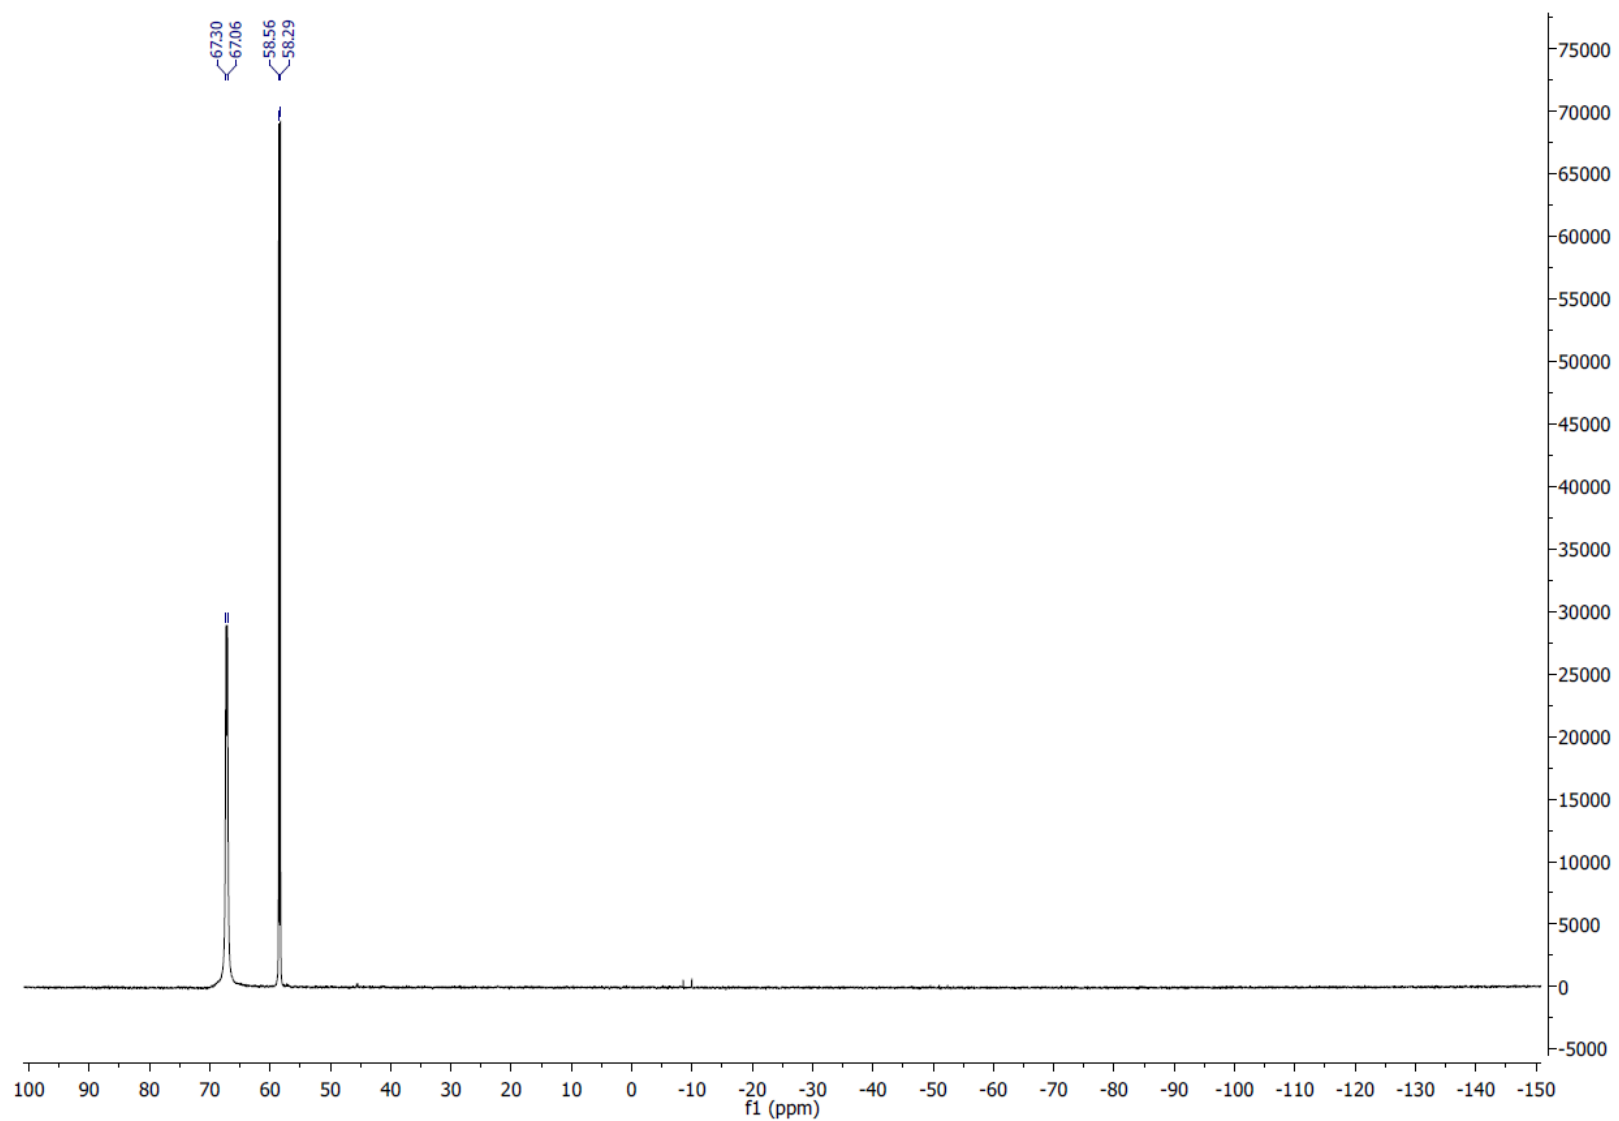

**Figure S7:**  $^{31}\text{P}\{^1\text{H}\}$  NMR (400 MHz, 298 K,  $\text{C}_6\text{D}_6$ ) of  $^{57}\text{FeBr}(\text{C}_6\text{H}_5)(\text{dmpe})_2$  ( $^{57}\text{Fe-2Ph}$ ). Starting  $^{57}\text{Fe}(\text{Cl})_2(\text{dmpe})_2$  ( $^{57}\text{Fe-1}$ ) is still present.

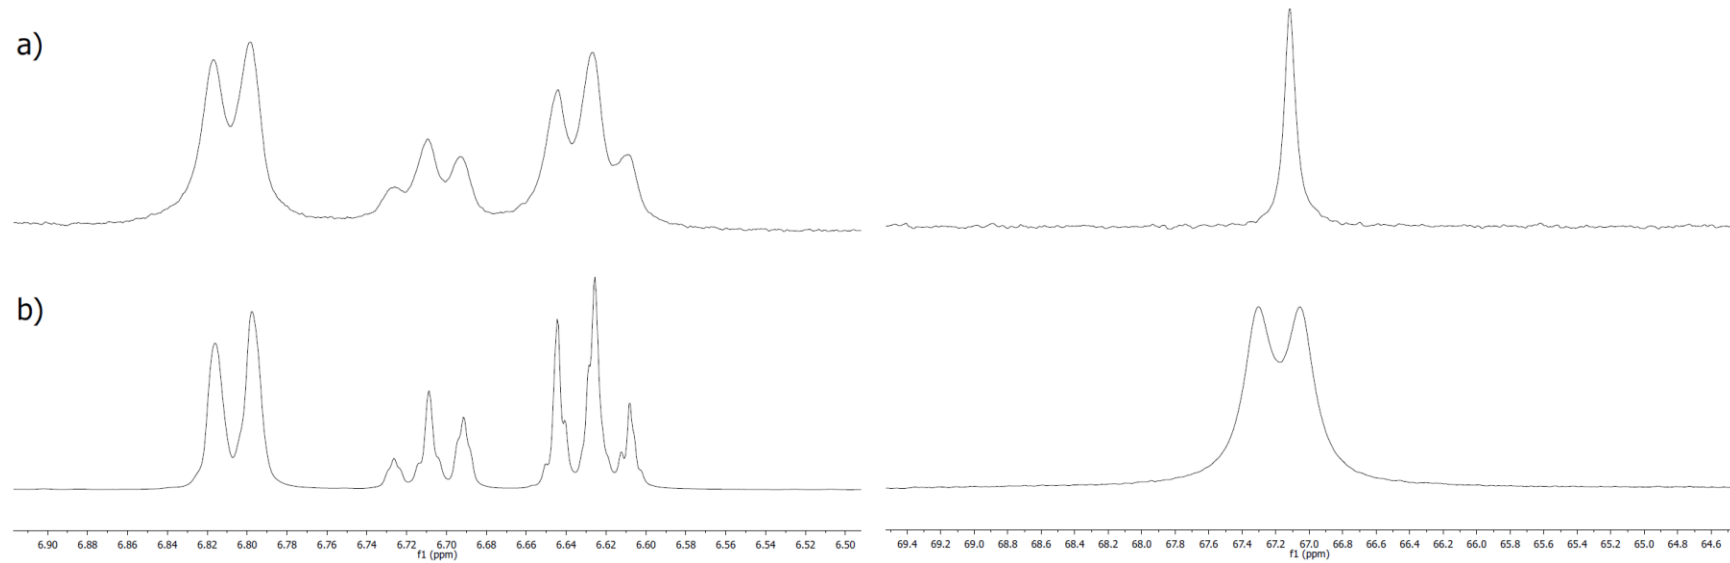

**Figure S8:**  $^1\text{H}$  (left) and  $^{31}\text{P}\{^1\text{H}\}$  NMR (right) (298 K,  $\text{C}_6\text{D}_6$ ) of complexes  $2\text{Ph}$  (a) and  $^{57}\text{Fe}-2\text{Ph}$  (b) generated by addition of 1 equiv. of  $\text{PhMgBr}$  onto **1** and  $^{57}\text{Fe}-\mathbf{1}$

**3) Speciation of the iron-containing species upon treatment of Fe(Cl)<sub>2</sub>(dmpe)<sub>2</sub> by M(hmde) (M = Li, Na, K)**

| Entry | Complexes                 | <sup>1</sup> H NMR and <sup>31</sup> P NMR                                                                                                                                                                                                                                         | References |
|-------|---------------------------|------------------------------------------------------------------------------------------------------------------------------------------------------------------------------------------------------------------------------------------------------------------------------------|------------|
| 1     | <b>1</b>                  | <sup>1</sup> H NMR:<br><i>trans</i> : 1.95 ppm (m), 1.35 (br)<br><sup>31</sup> P{ <sup>1</sup> H} NMR:<br><i>trans</i> : 58.8 ppm (s)                                                                                                                                              | [R2]       |
| 2     | <b>2<sub>Ph</sub></b>     | <sup>31</sup> P{ <sup>1</sup> H} NMR:<br><i>trans</i> : 68.4 ppm (s)                                                                                                                                                                                                               | [R3]       |
| 3     | <b>3'</b>                 | <sup>31</sup> P{ <sup>1</sup> H} NMR:<br>60.4 ppm (d, <i>J</i> <sub>PP</sub> = 10 Hz)<br>and 7.2 ppm (quin, <i>J</i> <sub>PP</sub> = 10 Hz)                                                                                                                                        | [R2]       |
| 4     | <b>3''</b>                | <sup>31</sup> P{ <sup>1</sup> H} NMR:<br>60.4 ppm (d, <i>J</i> <sub>PP</sub> = 10 Hz),<br>10.2 ppm (dq, <i>J</i> <sub>PP</sub> = 10, 20 Hz)<br>and -49.8 ppm (d, <i>J</i> <sub>PP</sub> = 20 Hz)                                                                                   | [R2]       |
| 5     | <b>4<sub>C6D5,D</sub></b> | <sup>31</sup> P{ <sup>1</sup> H} NMR:<br><i>trans</i> : 74.7 ppm (t, <i>J</i> <sub>PD</sub> = 7.5 Hz)<br><i>cis</i> : unresolved ABCD pattern                                                                                                                                      | [R3]       |
| 6     | <b>4<sub>C6H5,H</sub></b> | <sup>1</sup> H NMR:<br><i>trans</i> : -19,7 ppm (quin, <i>J</i> <sub>PH</sub> = 48.5 Hz)<br><i>cis</i> : -13.4 ppm (m, <i>J</i> <sub>PH</sub> = 68, 53, 53, 38 Hz)<br><sup>31</sup> P{ <sup>1</sup> H} NMR:<br><i>trans</i> : 74.5 ppm (s)<br><i>cis</i> : unresolved ABCD pattern | [R3]       |
| 7     | <b>5<sup>-</sup></b>      | <sup>1</sup> H NMR:<br>-4.72 ppm (br)                                                                                                                                                                                                                                              | [R4]       |

**Table S1:** <sup>1</sup>H NMR and <sup>31</sup>P{<sup>1</sup>H} NMR (C<sub>6</sub>D<sub>6</sub>, 298K) diagnostic signals of FeCl<sub>2</sub>(dmpe)<sub>2</sub> (**1**), FeCl(C<sub>6</sub>H<sub>5</sub>)(dmpe)<sub>2</sub> (**2<sub>Ph</sub>**), Fe<sup>0</sup><sub>2</sub>(dmpe)<sub>5</sub> (**3'**), Fe<sup>0</sup>(dmpe)<sub>3</sub> (**3''**), Fe(D)(C<sub>6</sub>D<sub>5</sub>)(dmpe)<sub>2</sub> (**4<sub>C6D5,D</sub>**), Fe(H)(C<sub>6</sub>H<sub>5</sub>)(dmpe)<sub>2</sub> (**4<sub>C6H5,H</sub>**) and Fe(hmde)<sub>3</sub><sup>-</sup> (**5<sup>-</sup>**) reported in the literature

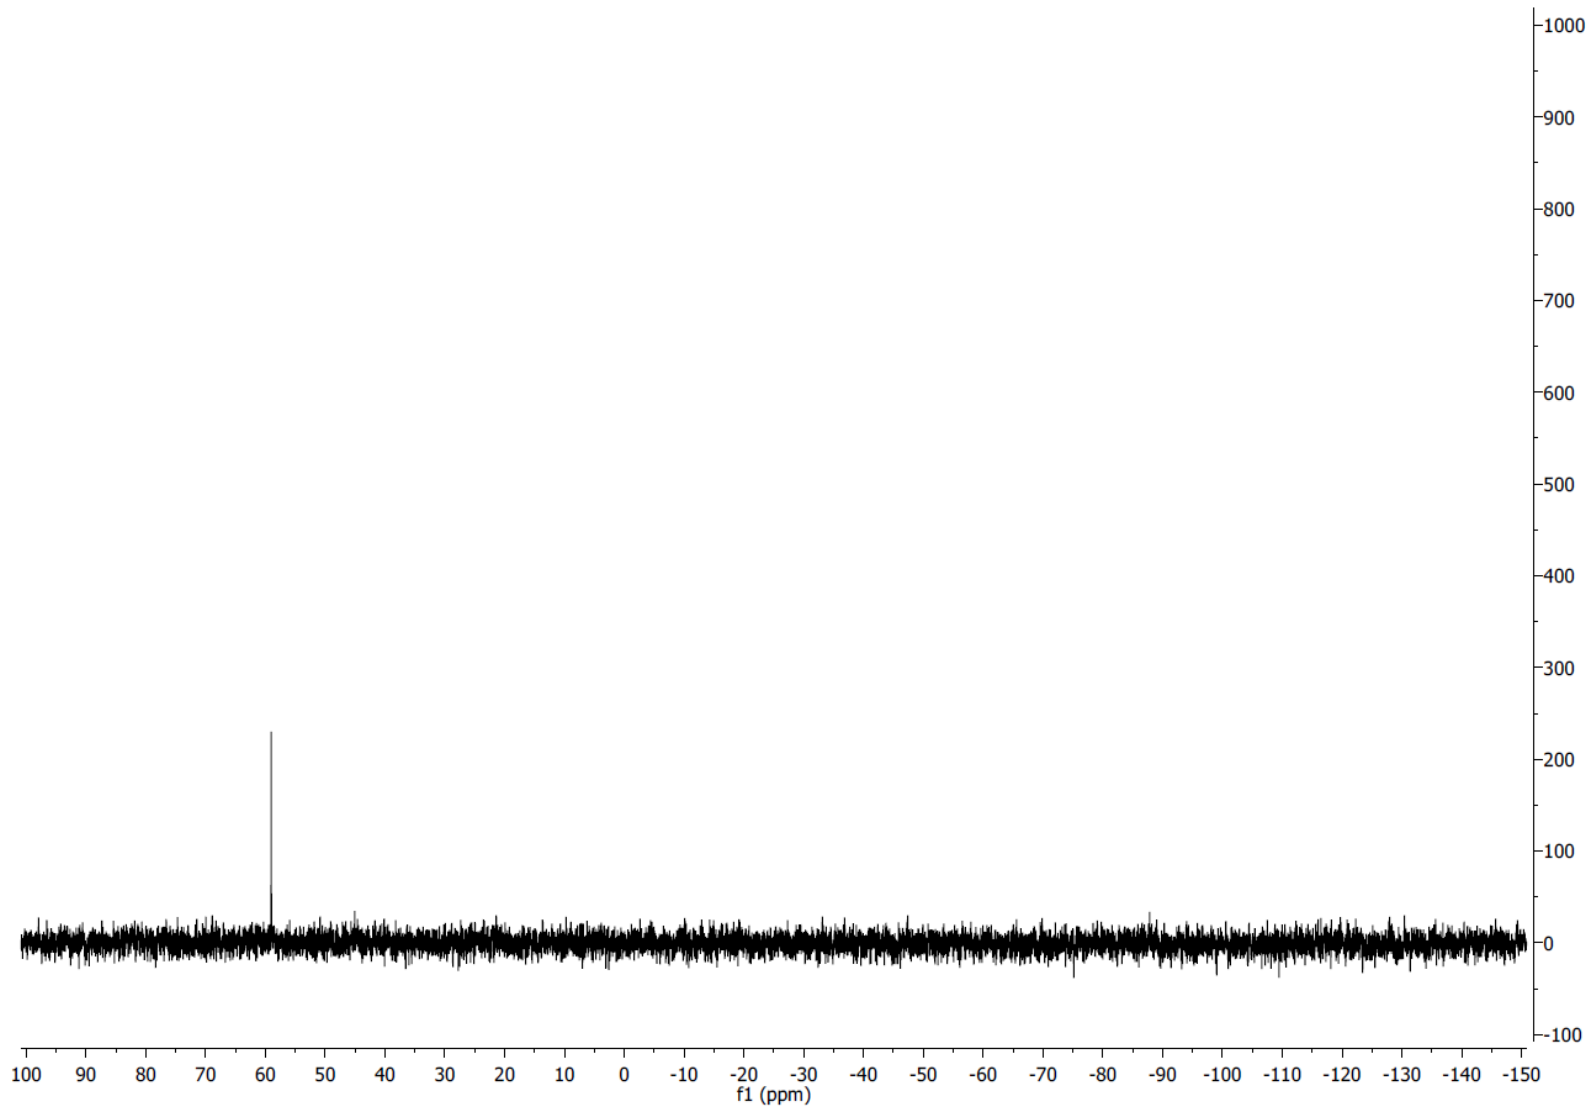

**Figure S9:**  $^{31}\text{P}\{^1\text{H}\}$  NMR (162 MHz, 298 K,  $\text{C}_6\text{D}_6$ ) of  $\text{Fe}(\text{Cl})_2(\text{dmpe})_2$  (**1**) (8.7  $\mu\text{mol}$ ) treated by 2 equiv. of  $\text{Li}(\text{hmnds})$  after 72 h at 20  $^\circ\text{C}$ .

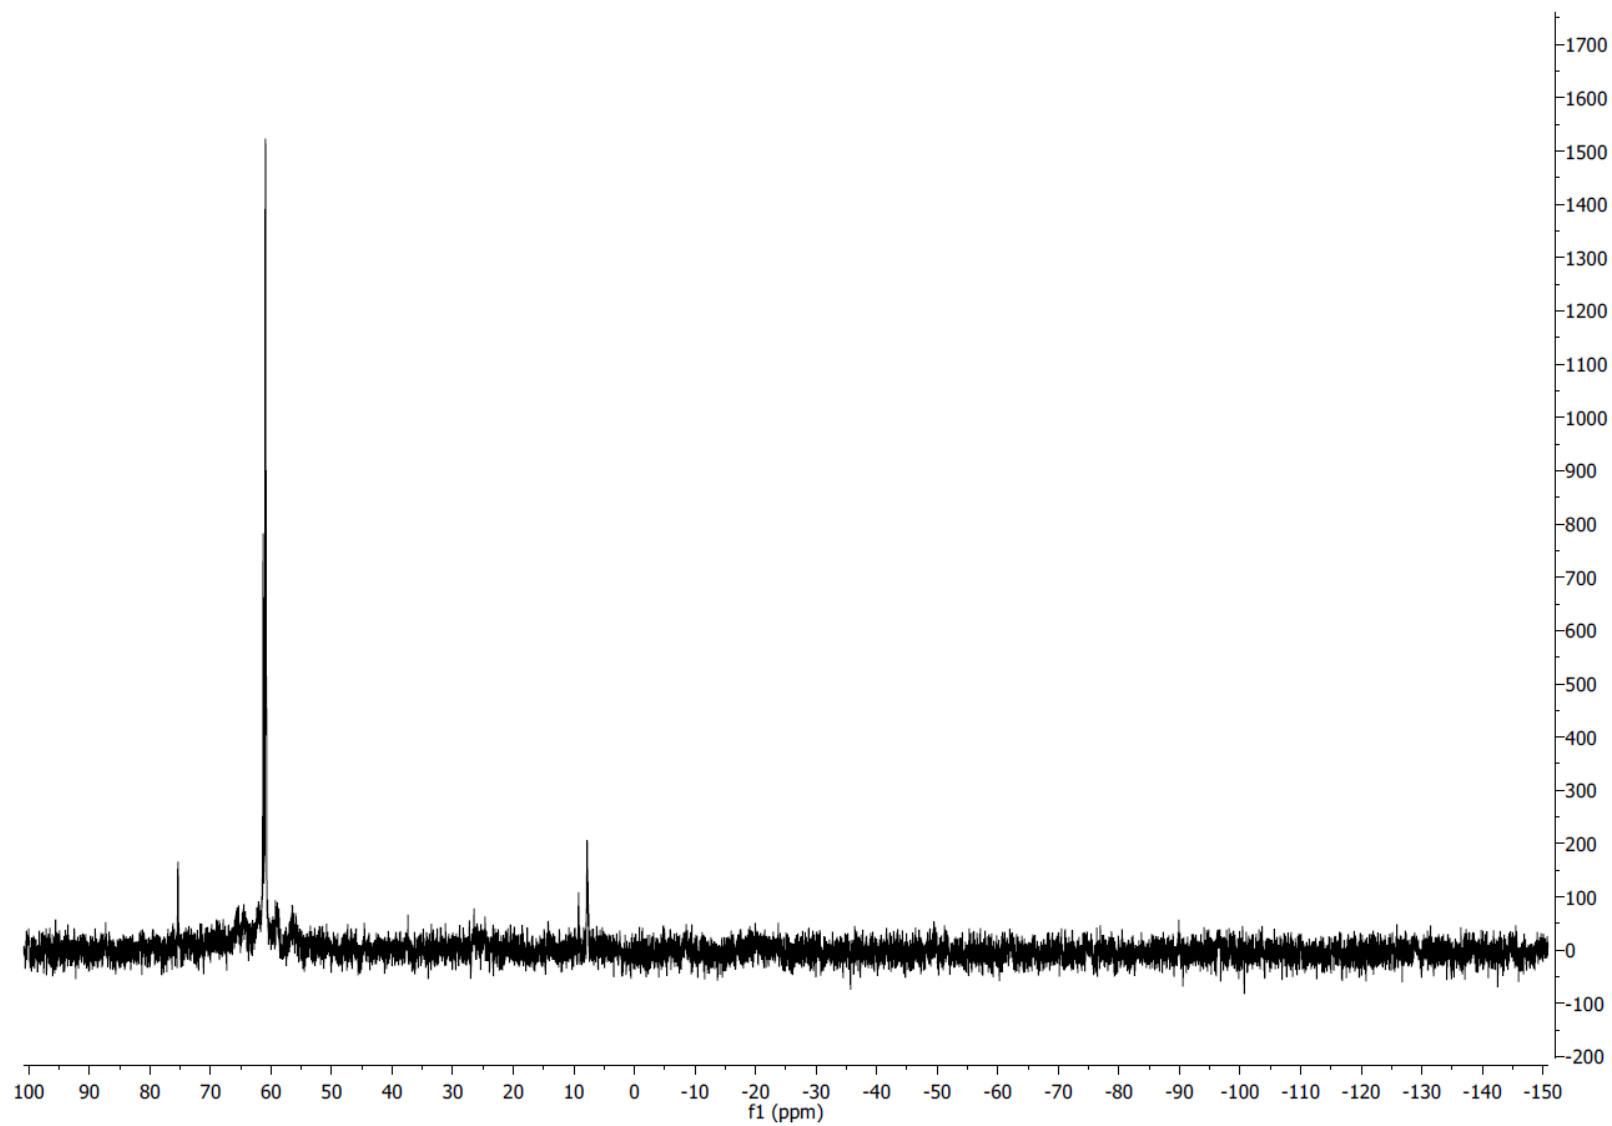

**Figure S10:**  $^{31}\text{P}\{^1\text{H}\}$  NMR (162 MHz, 298 K,  $\text{C}_6\text{D}_6$ ) of  $\text{Fe}(\text{Cl})_2(\text{dmpe})_2$  (**1**) (8.9  $\mu\text{mol}$ ) treated by 2 equiv. of  $\text{Na}(\text{hmde})$  after 72 h at 20  $^\circ\text{C}$ .



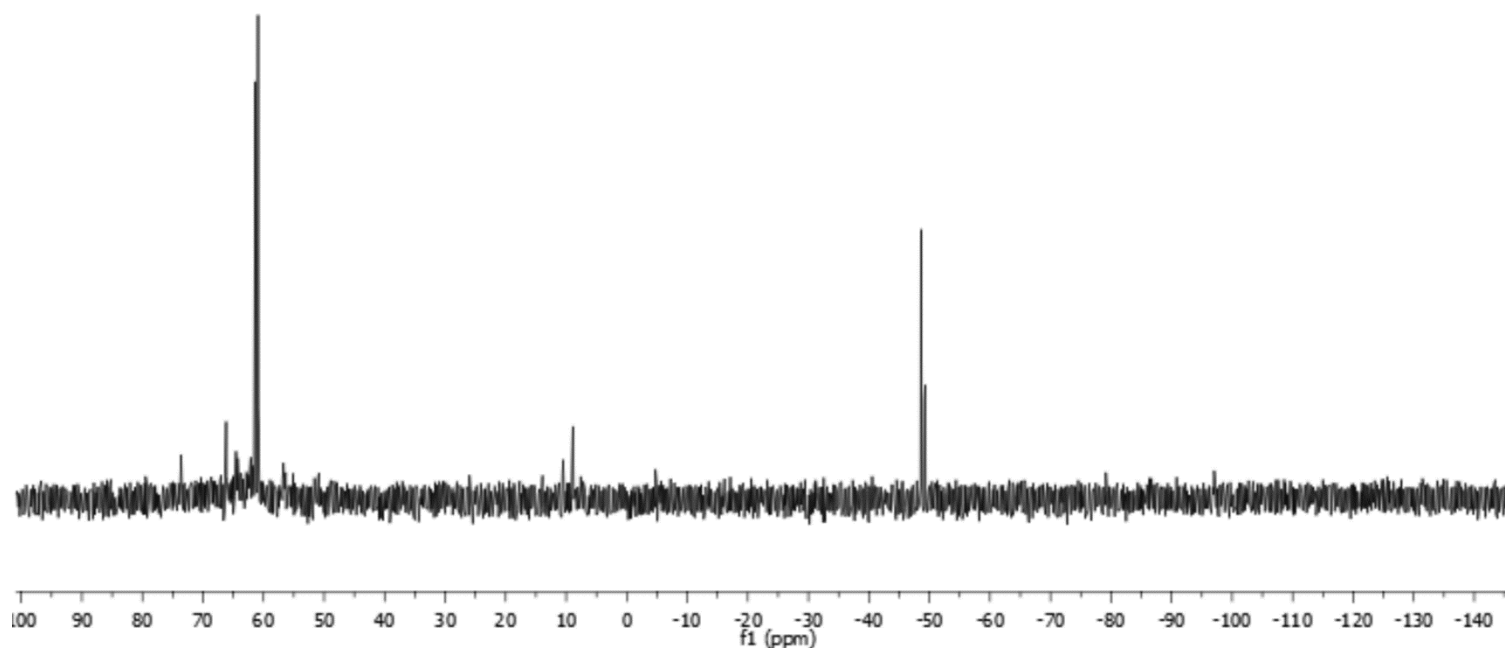

**Figure S11:**  $^{31}\text{P}\{^1\text{H}\}$  NMR (162 MHz, 298 K,  $\text{C}_6\text{D}_6$ ) of  $\text{Fe}(\text{Cl})_2(\text{dmpe})_2$  (**1**) (8.9  $\mu\text{mol}$ ) treated by 2 equiv. of  $\text{K}(\text{hmde})$  after 72 h at 20  $^\circ\text{C}$ .

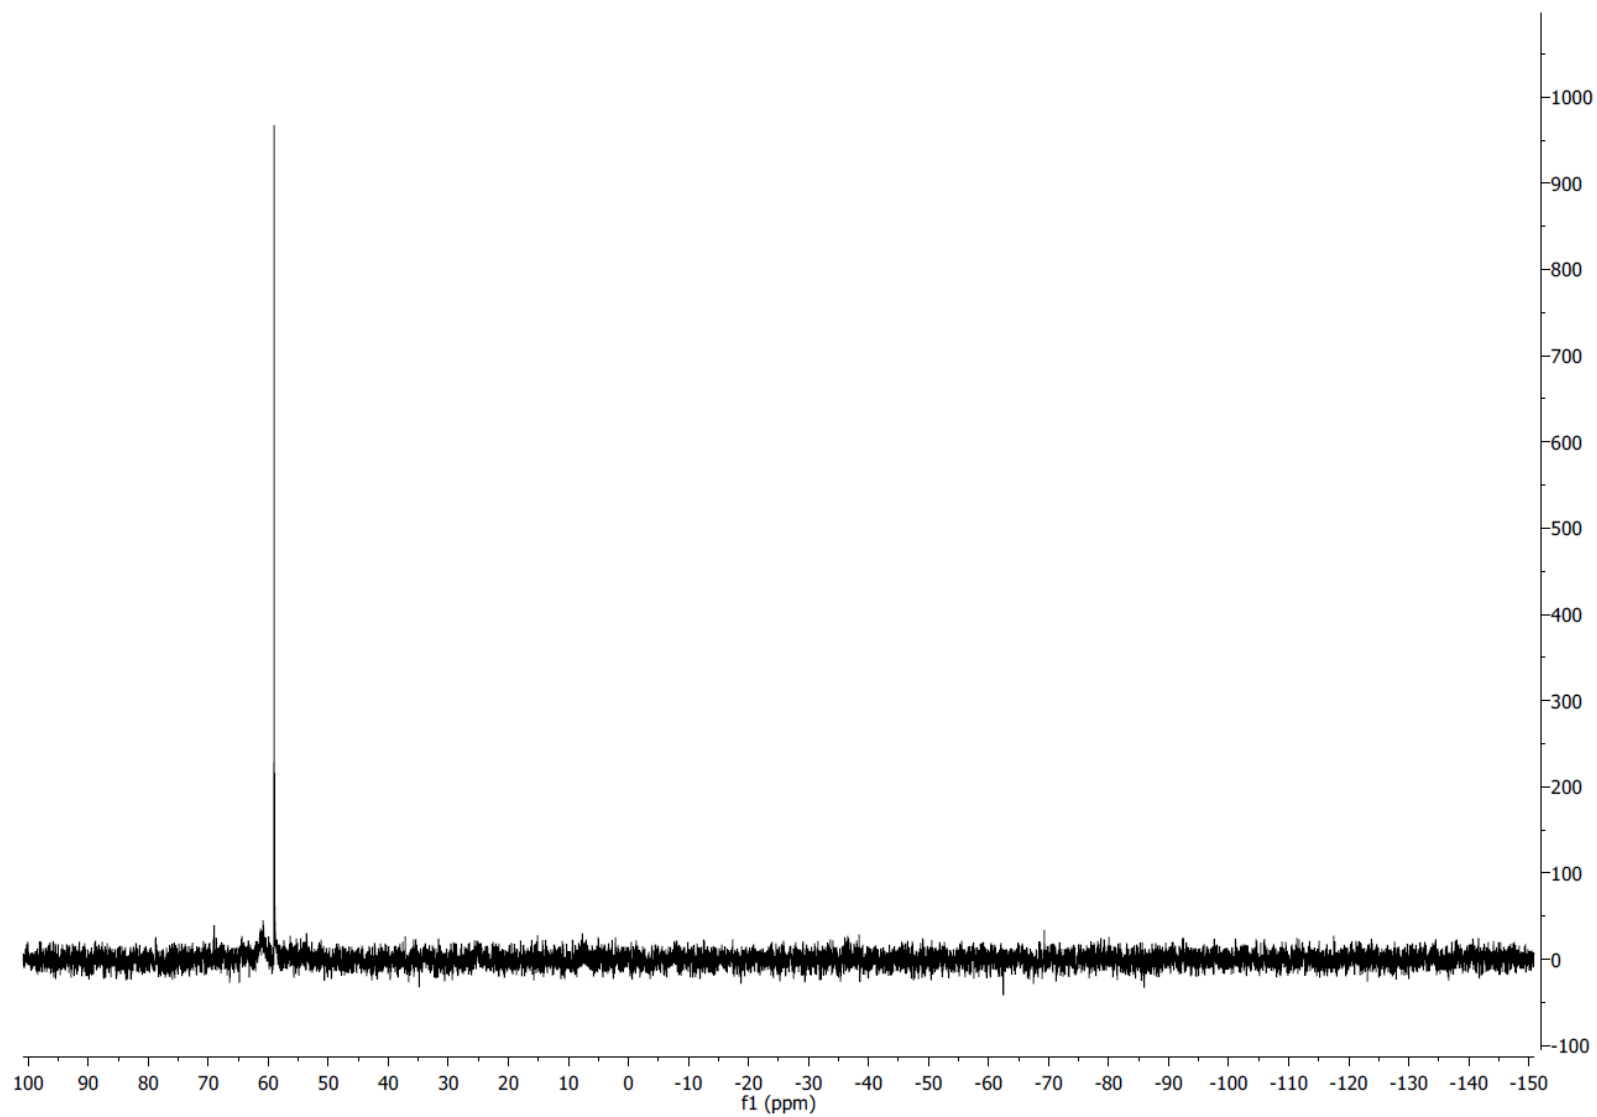

**Figure S12:**  $^{31}\text{P}\{^1\text{H}\}$  NMR (162 MHz, 298 K,  $\text{C}_6\text{D}_6/\text{THF}$  9:1) of  $\text{Fe}(\text{Cl})_2(\text{dmpe})_2$  (**1**) (8.7  $\mu\text{mol}$ ) treated by 2 equiv. of  $\text{Li}(\text{hmds})$  after 72 h at 20  $^\circ\text{C}$ .

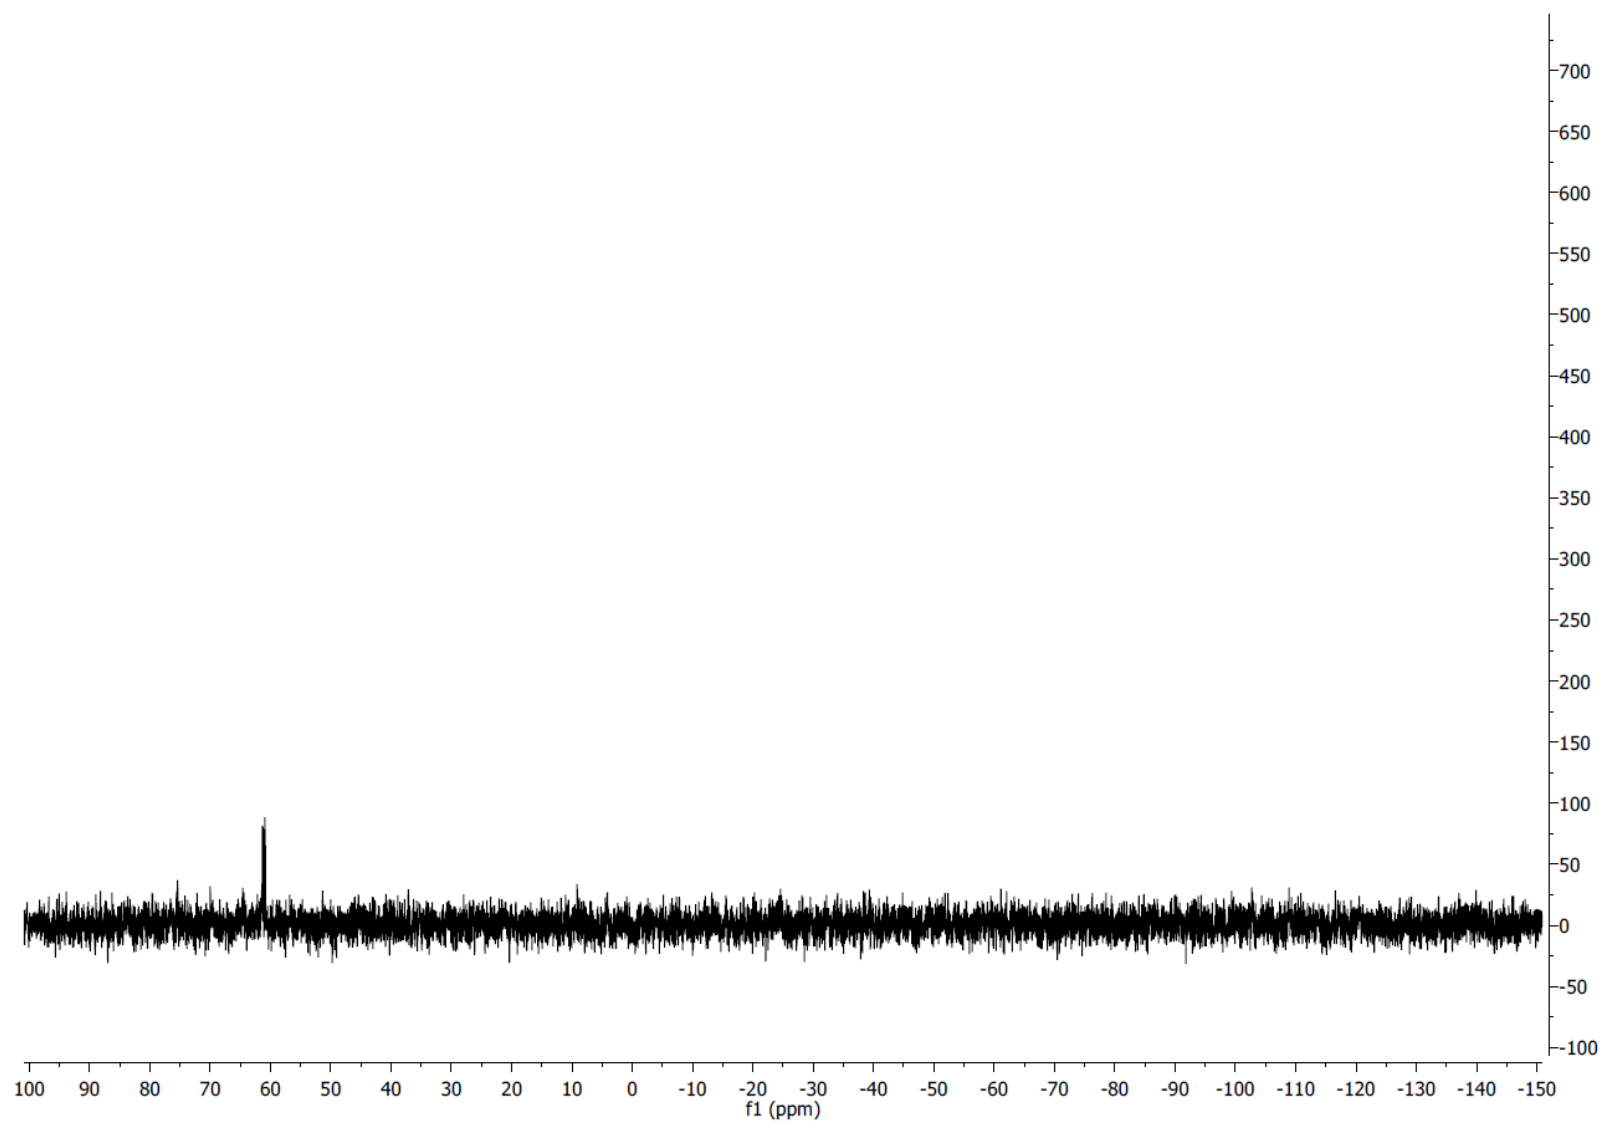

**Figure S13:**  $^{31}\text{P}\{^1\text{H}\}$  NMR (162 MHz, 298 K,  $\text{C}_6\text{D}_6/\text{THF}$  9:1) of  $\text{Fe}(\text{Cl})_2(\text{dmpe})_2$  (**1**) (8.7  $\mu\text{mol}$ ) treated by 2 equiv. of  $\text{Na}(\text{hmds})$  after 72 h at 20  $^\circ\text{C}$ .

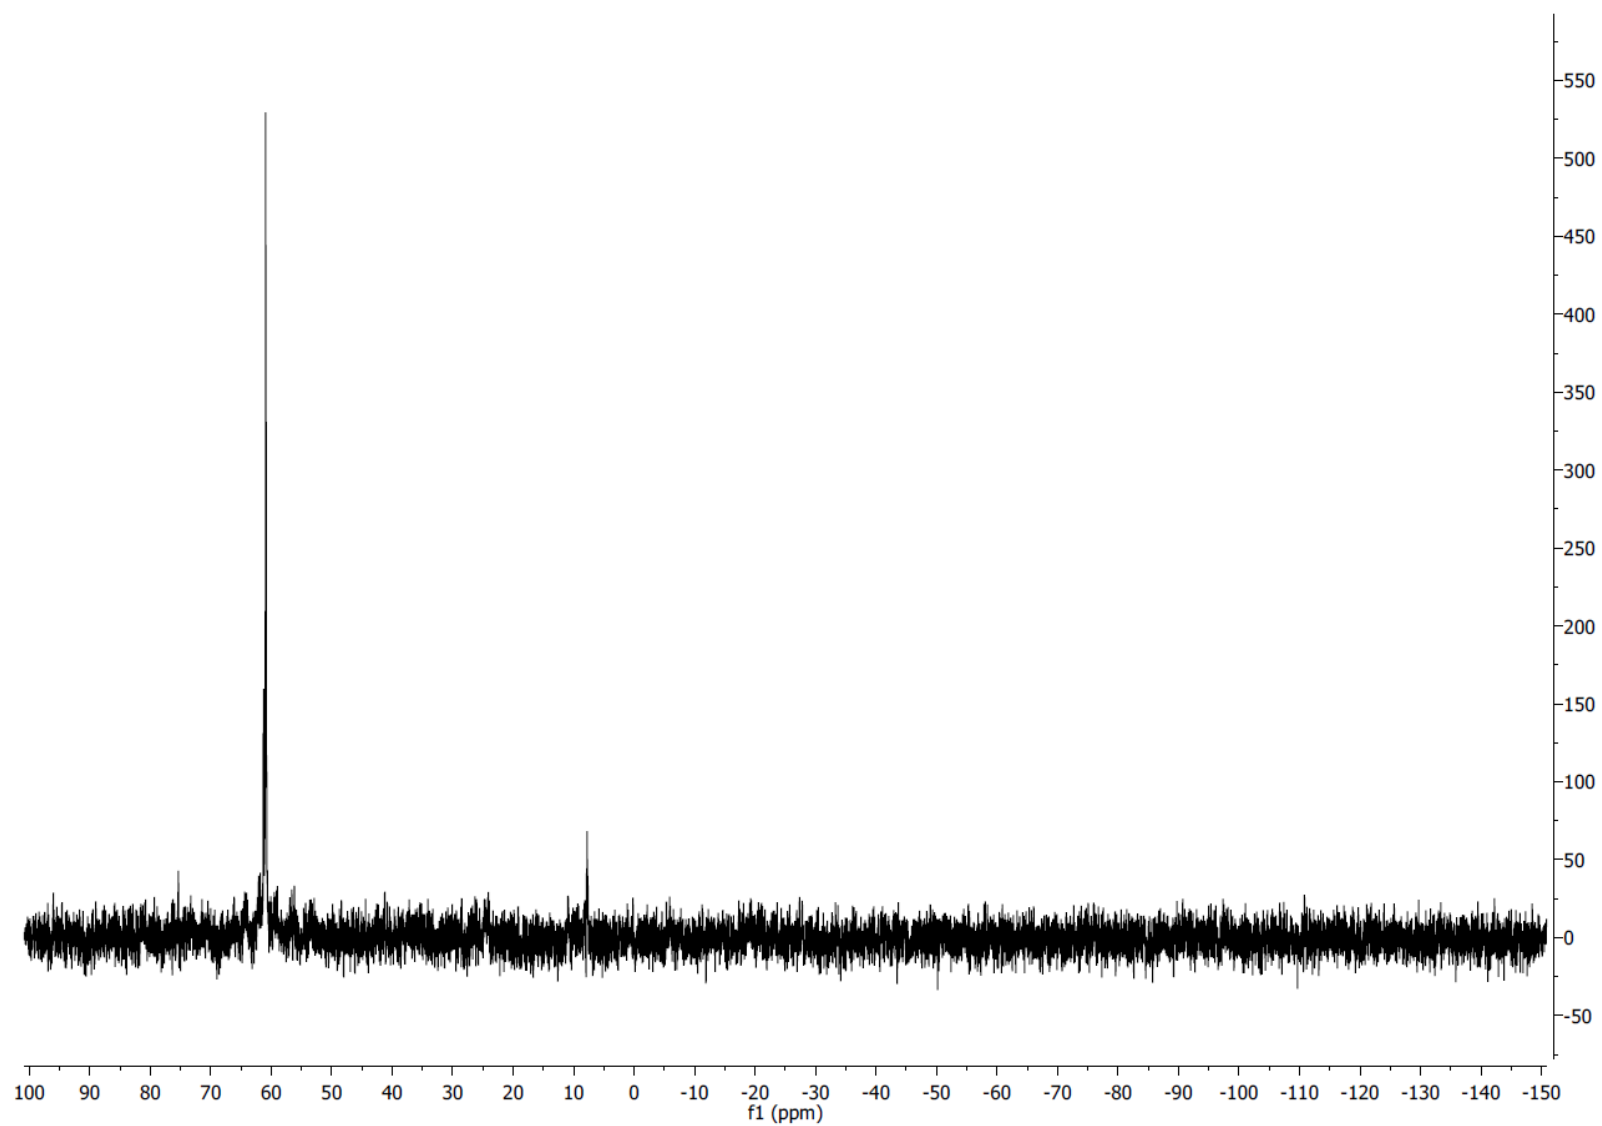

**Figure S14:**  $^{31}\text{P}\{^1\text{H}\}$  NMR (162 MHz, 298 K,  $\text{C}_6\text{D}_6/\text{THF}$  9:1) of  $\text{Fe}(\text{Cl})_2(\text{dmpe})_2$  (**1**) (8.7  $\mu\text{mol}$ ) treated by 2 equiv. of  $\text{K}(\text{hmds})$  after 72 h at 20  $^\circ\text{C}$ .

a) C<sub>6</sub>D<sub>6</sub>

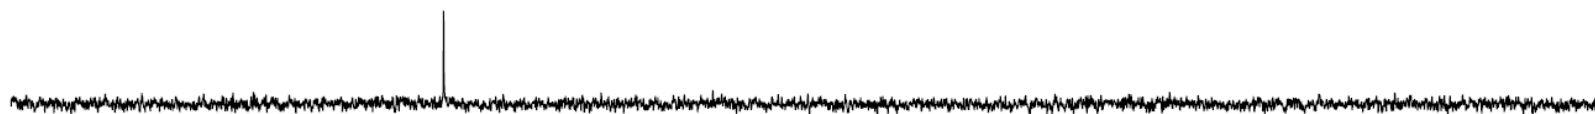

b) C<sub>6</sub>D<sub>6</sub>/THF

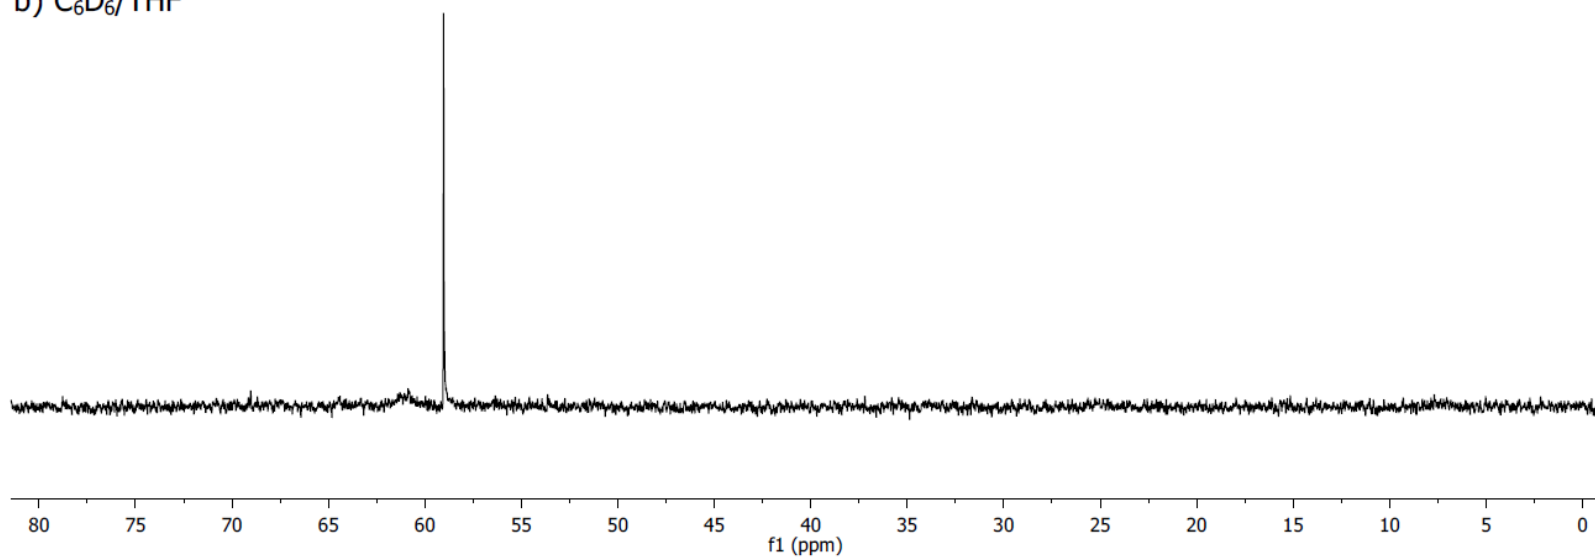

**Figure S15:** <sup>31</sup>P{<sup>1</sup>H} NMR (162 MHz, 298 K, C<sub>6</sub>D<sub>6</sub>) of Fe(Cl)<sub>2</sub>(dmpe)<sub>2</sub> treated by 2 equiv. of Li(hmds) after 72 h at 20 °C without THF (a) and with THF (b).

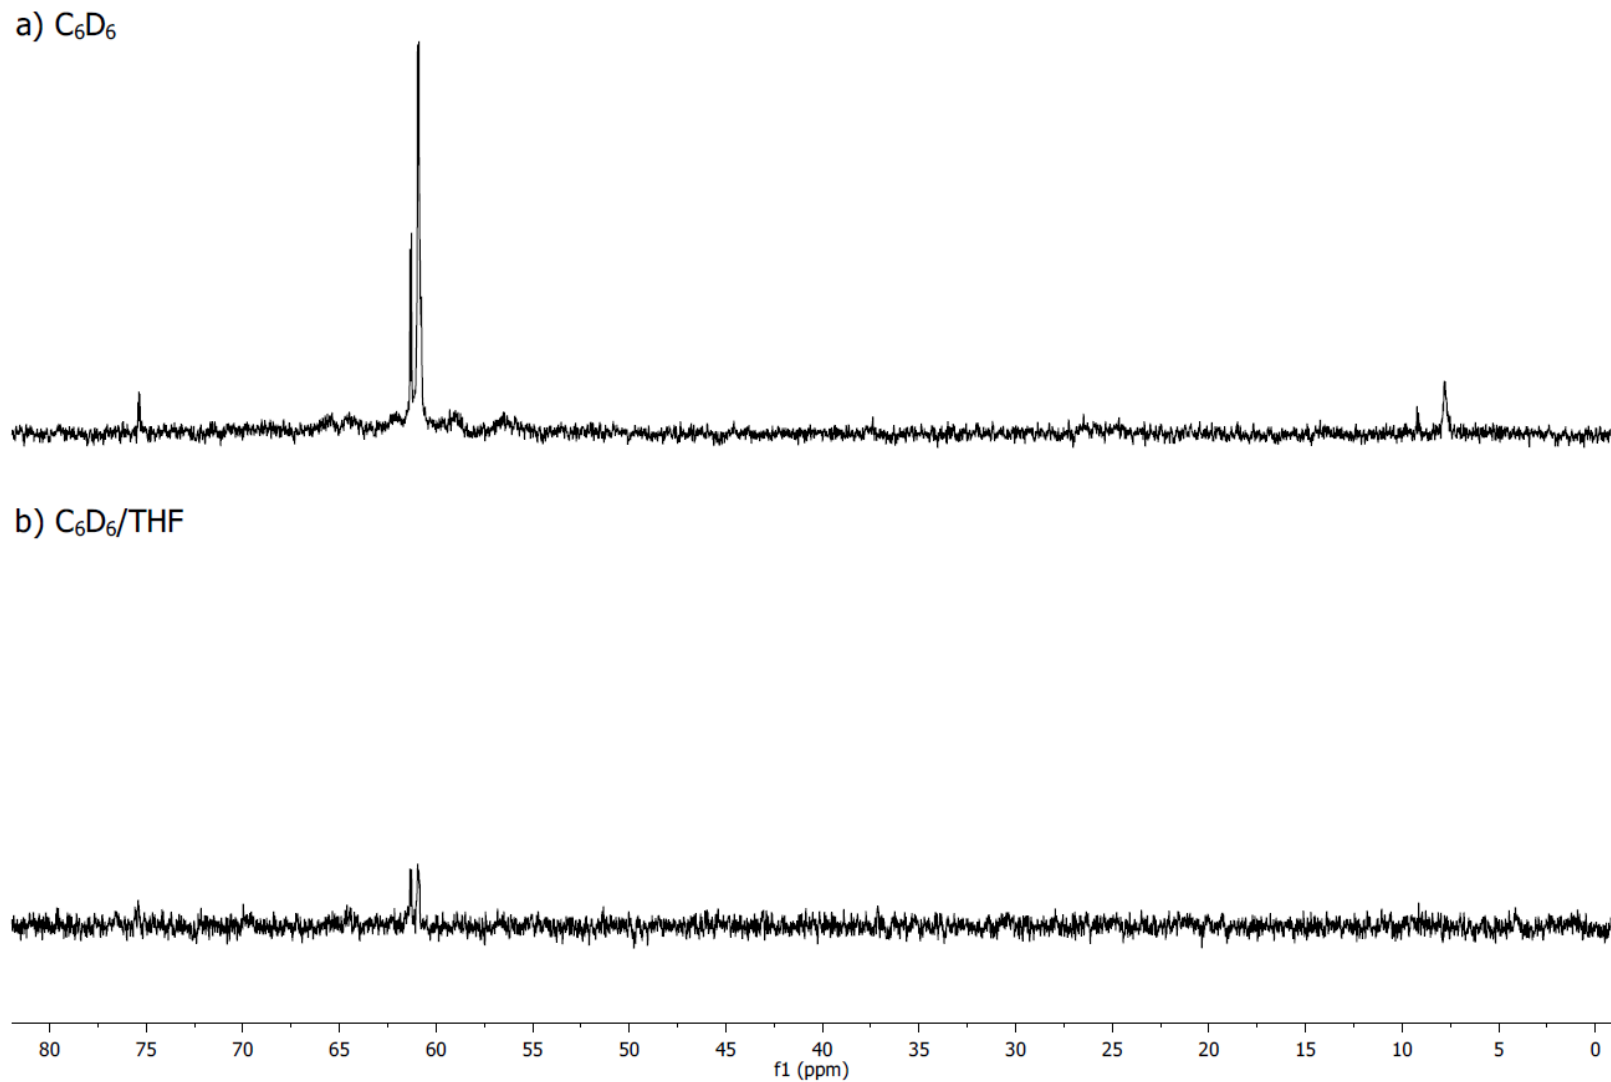

**Figure S16:**  $^{31}\text{P}\{^1\text{H}\}$  NMR (162 MHz, 298 K, C<sub>6</sub>D<sub>6</sub>) of Fe(Cl)<sub>2</sub>(dmpe)<sub>2</sub> treated by 2 equiv. of Na(hmds) after 72 h at 20 °C without THF (a) and with THF (b).

a) C<sub>6</sub>D<sub>6</sub>

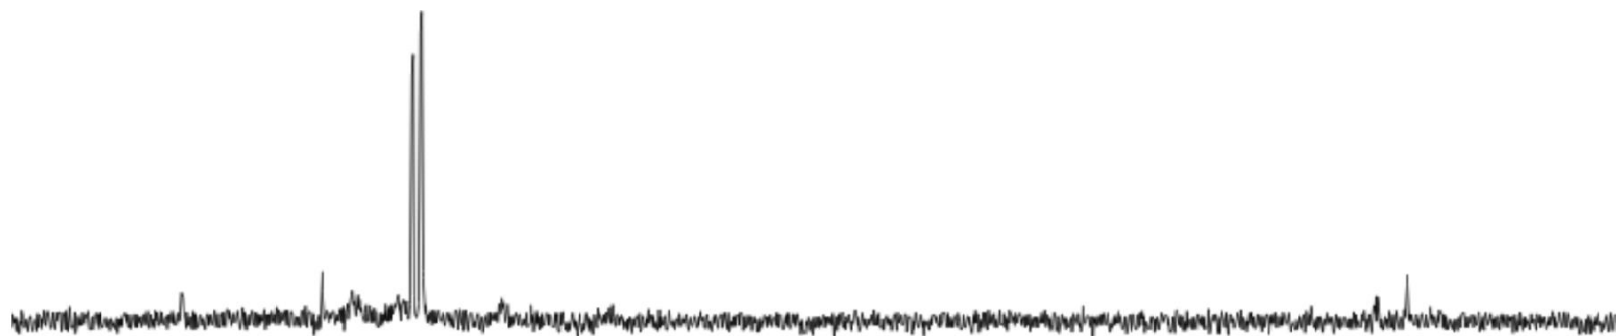

b) C<sub>6</sub>D<sub>6</sub>/THF

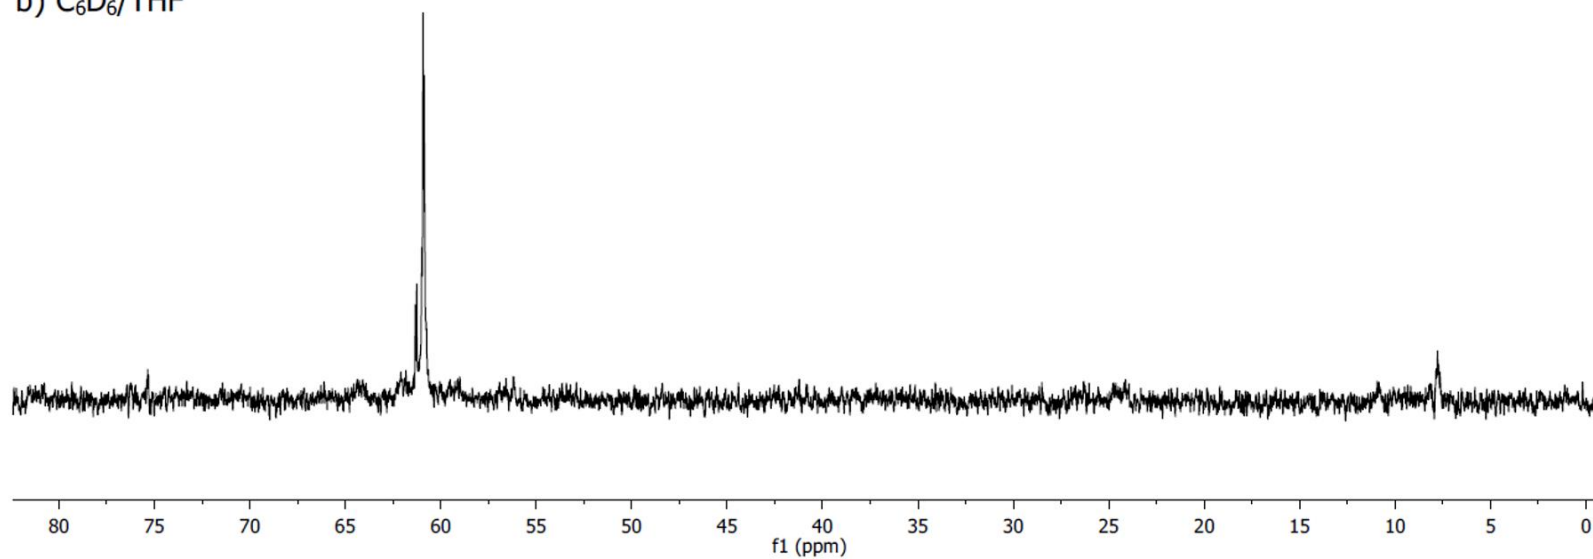

**Figure S17:**  $^{31}\text{P}\{^1\text{H}\}$  NMR (162 MHz, 298 K, C<sub>6</sub>D<sub>6</sub>) of Fe(Cl)<sub>2</sub>(dmpe)<sub>2</sub> treated by 2 equiv. of K(hmde) after 72 h at 20 °C without THF (a) and with THF (b).

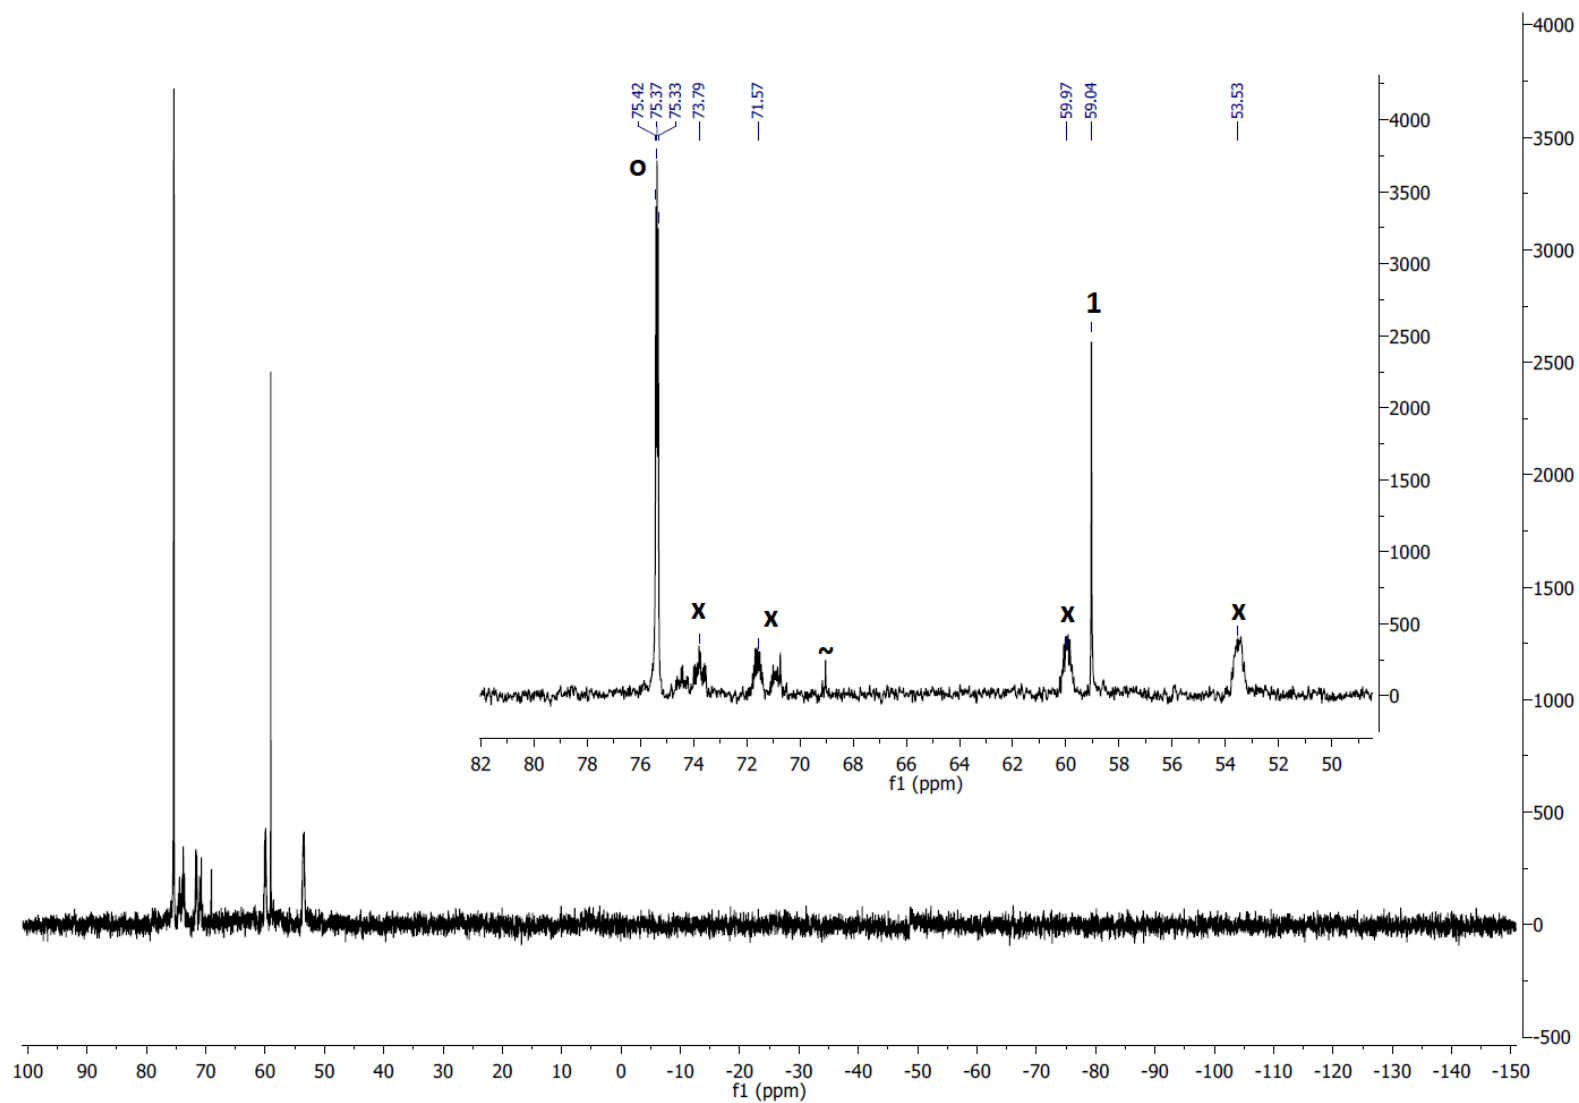

**Figure S18:**  $^{31}\text{P}\{^1\text{H}\}$  NMR (162 MHz, 298 K,  $\text{C}_6\text{D}_6$ ) of  $\text{Fe}(\text{Cl})_2(\text{dmpe})_2$  (**1**) (8.7  $\mu\text{mol}$ ) treated by 2 equiv. of  $\text{Li}(\text{hmde})$  after 72 h upon photolysis (350 nm). It shows the presence of *trans*- (**O**) and *cis*- (**X**)  $\text{Fe}(\text{D})(\text{C}_6\text{D}_5)(\text{dmpe})_2$  (**4C6D5,D**), starting  $\text{Fe}(\text{Cl})_2(\text{dmpe})_2$  (**1**) and unknown species (~).



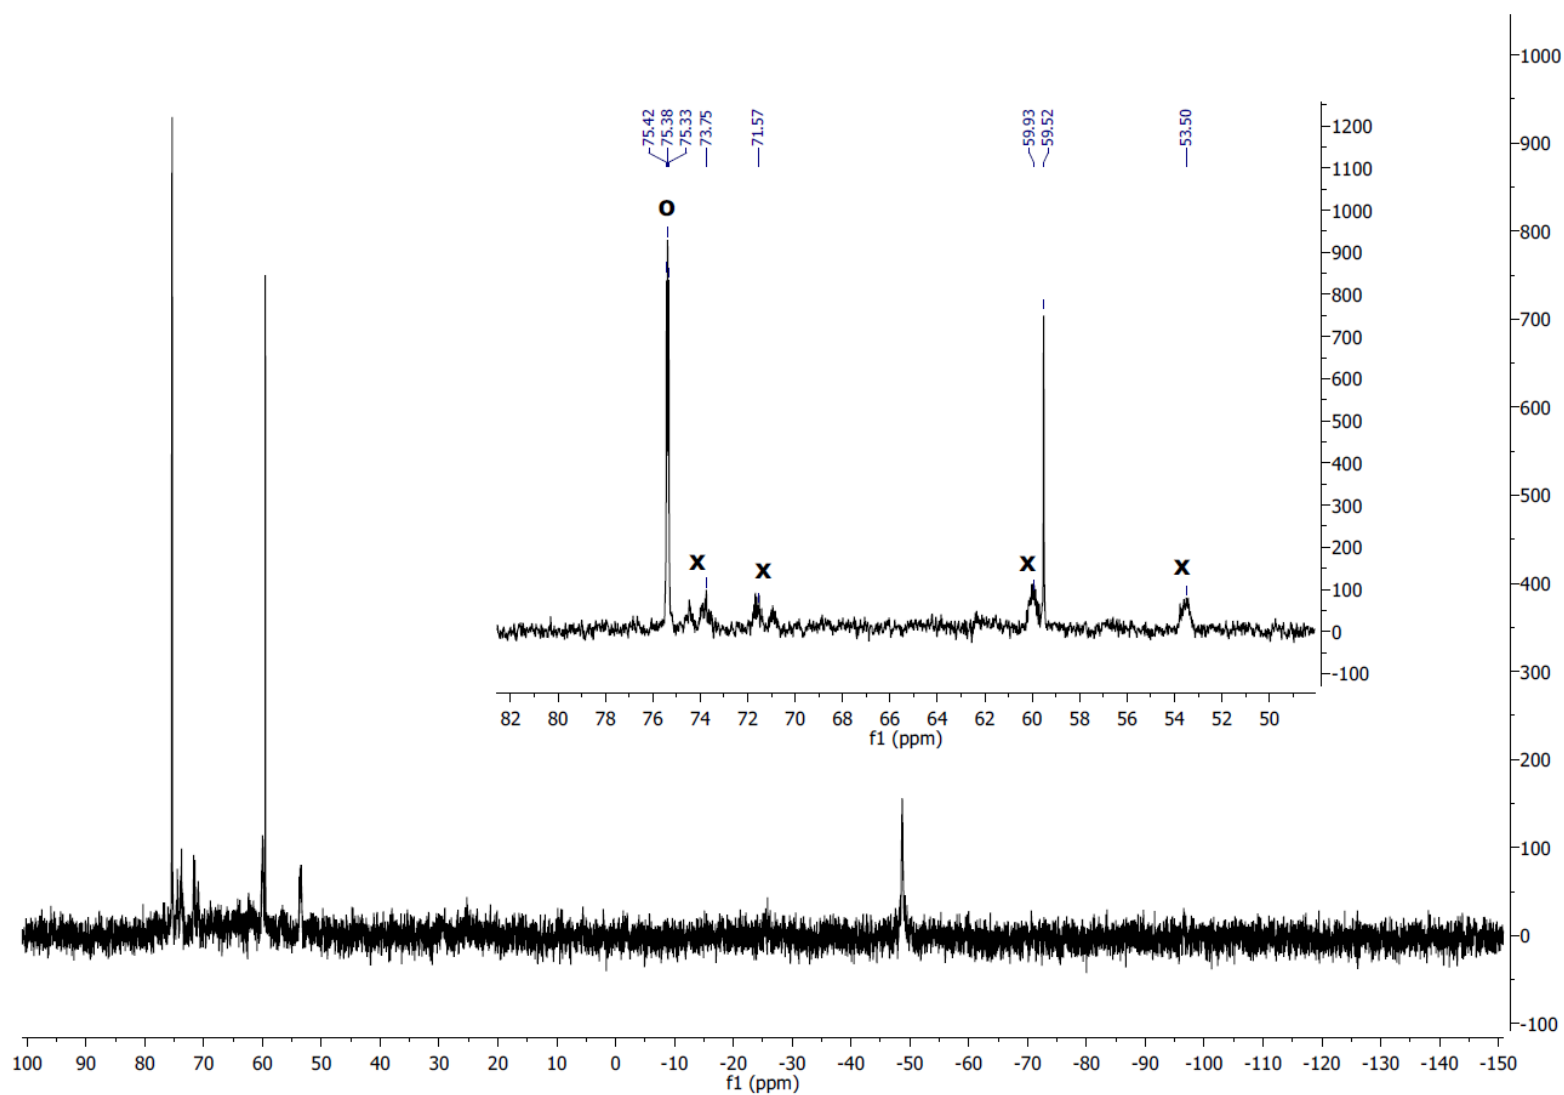

**Figure S19:**  $^{31}\text{P}\{^1\text{H}\}$  NMR (162 MHz, 298 K,  $\text{C}_6\text{D}_6$ ) of  $\text{Fe}(\text{Cl})_2(\text{dmpe})_2$  (**1**) (8.9  $\mu\text{mol}$ ) treated by 2 equiv. of  $\text{Na}(\text{hmde})$  after 72 h upon photolysis (350 nm). It shows the presence of *trans*- (**O**) and *cis*- (**X**)  $\text{Fe}(\text{D})(\text{C}_6\text{D}_5)(\text{dmpe})_2$  (**4C6D5,D**).

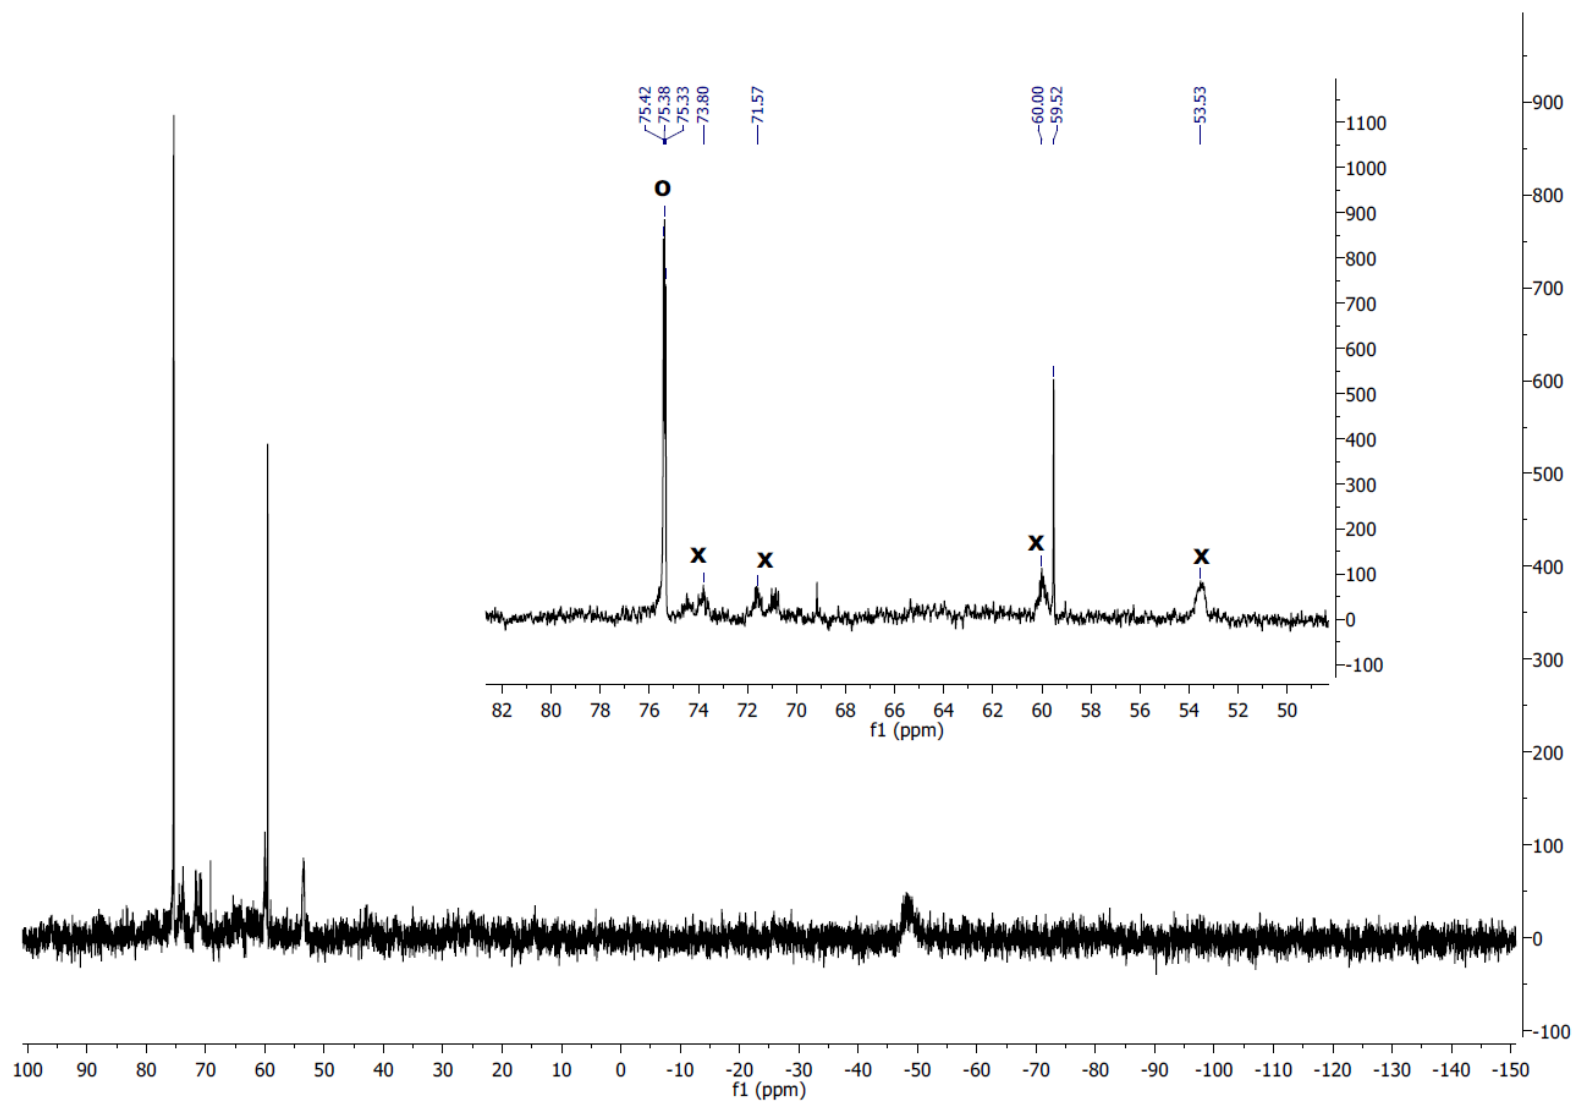

**Figure S20:**  $^{31}\text{P}\{^1\text{H}\}$  NMR (162 MHz, 298 K,  $\text{C}_6\text{D}_6$ ) of  $\text{Fe}(\text{Cl})_2(\text{dmpe})_2$  (**1**) (8.9  $\mu\text{mol}$ ) treated by 2 equiv. of  $\text{K}(\text{hmds})$  after 72 h upon photolysis (350 nm). It shows the presence of *trans*- (**O**) and *cis*- (**X**)  $\text{Fe}(\text{D})(\text{C}_6\text{D}_5)(\text{dmpe})_2$  (**4C6D5,D**).

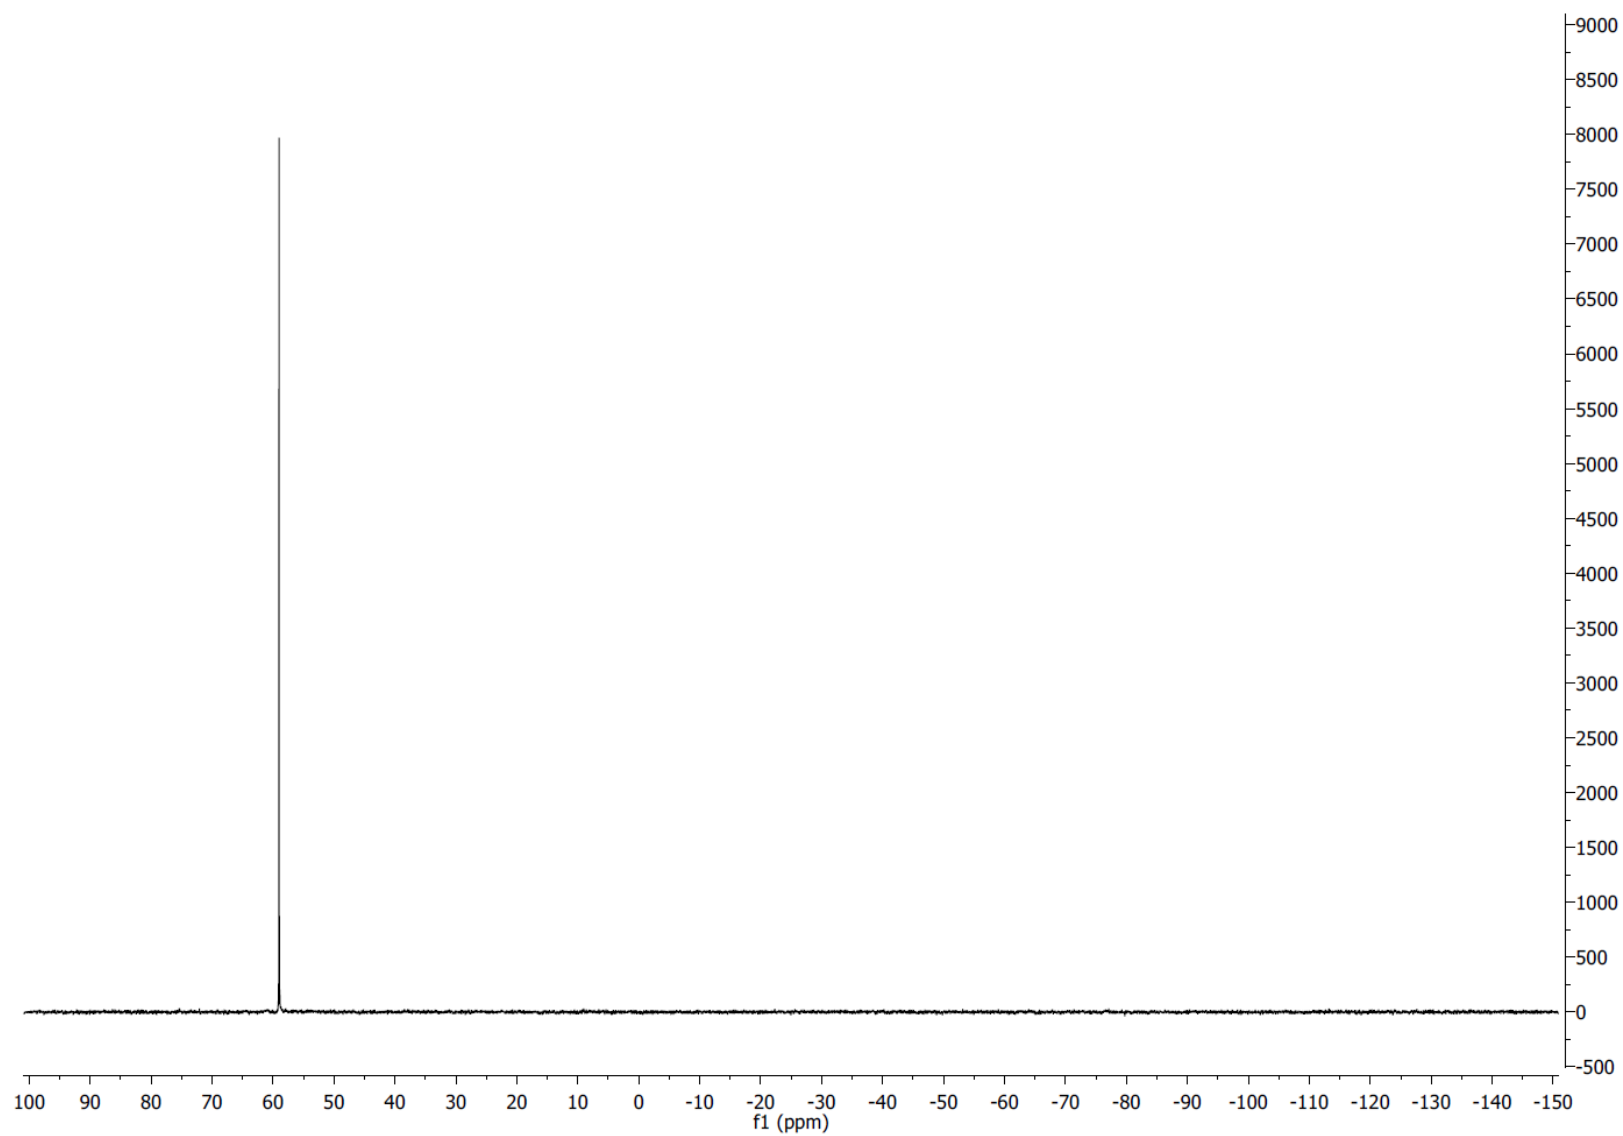

**Figure S21:**  $^{31}\text{P}\{^1\text{H}\}$  NMR (162 MHz, 298 K,  $\text{C}_6\text{D}_6/\text{THF}$  9:1) of  $\text{Fe}(\text{Cl})_2(\text{dmpe})_2$  (**1**) (9.1  $\mu\text{mol}$ ) treated by 10 equiv. of  $\text{Li}(\text{hmds})$  after 22 h at 20  $^\circ\text{C}$ .

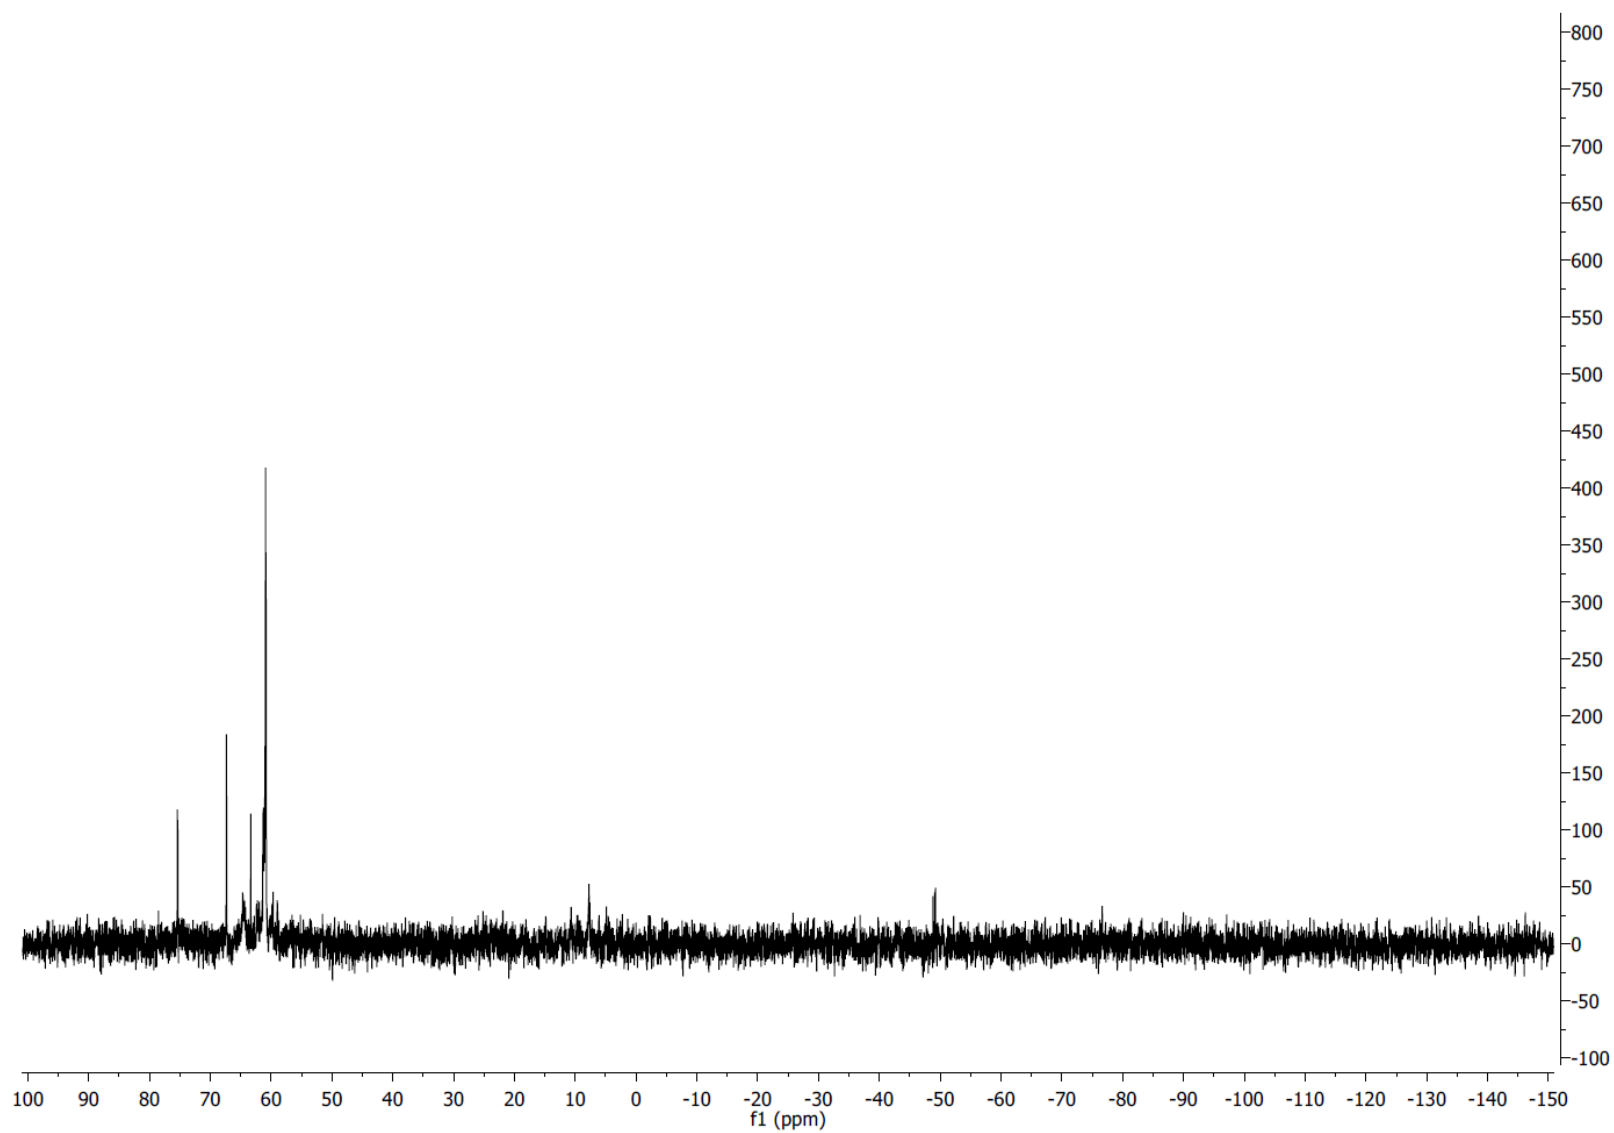

**Figure S22:**  $^{31}\text{P}\{^1\text{H}\}$  NMR (162 MHz, 298 K,  $\text{C}_6\text{D}_6/\text{THF}$  9:1) of  $\text{Fe}(\text{Cl})_2(\text{dmpe})_2$  (**1**) (8.4  $\mu\text{mol}$ ) treated by 10 equiv. of  $\text{Na}(\text{hmds})$  after 22 h at 20  $^\circ\text{C}$ .

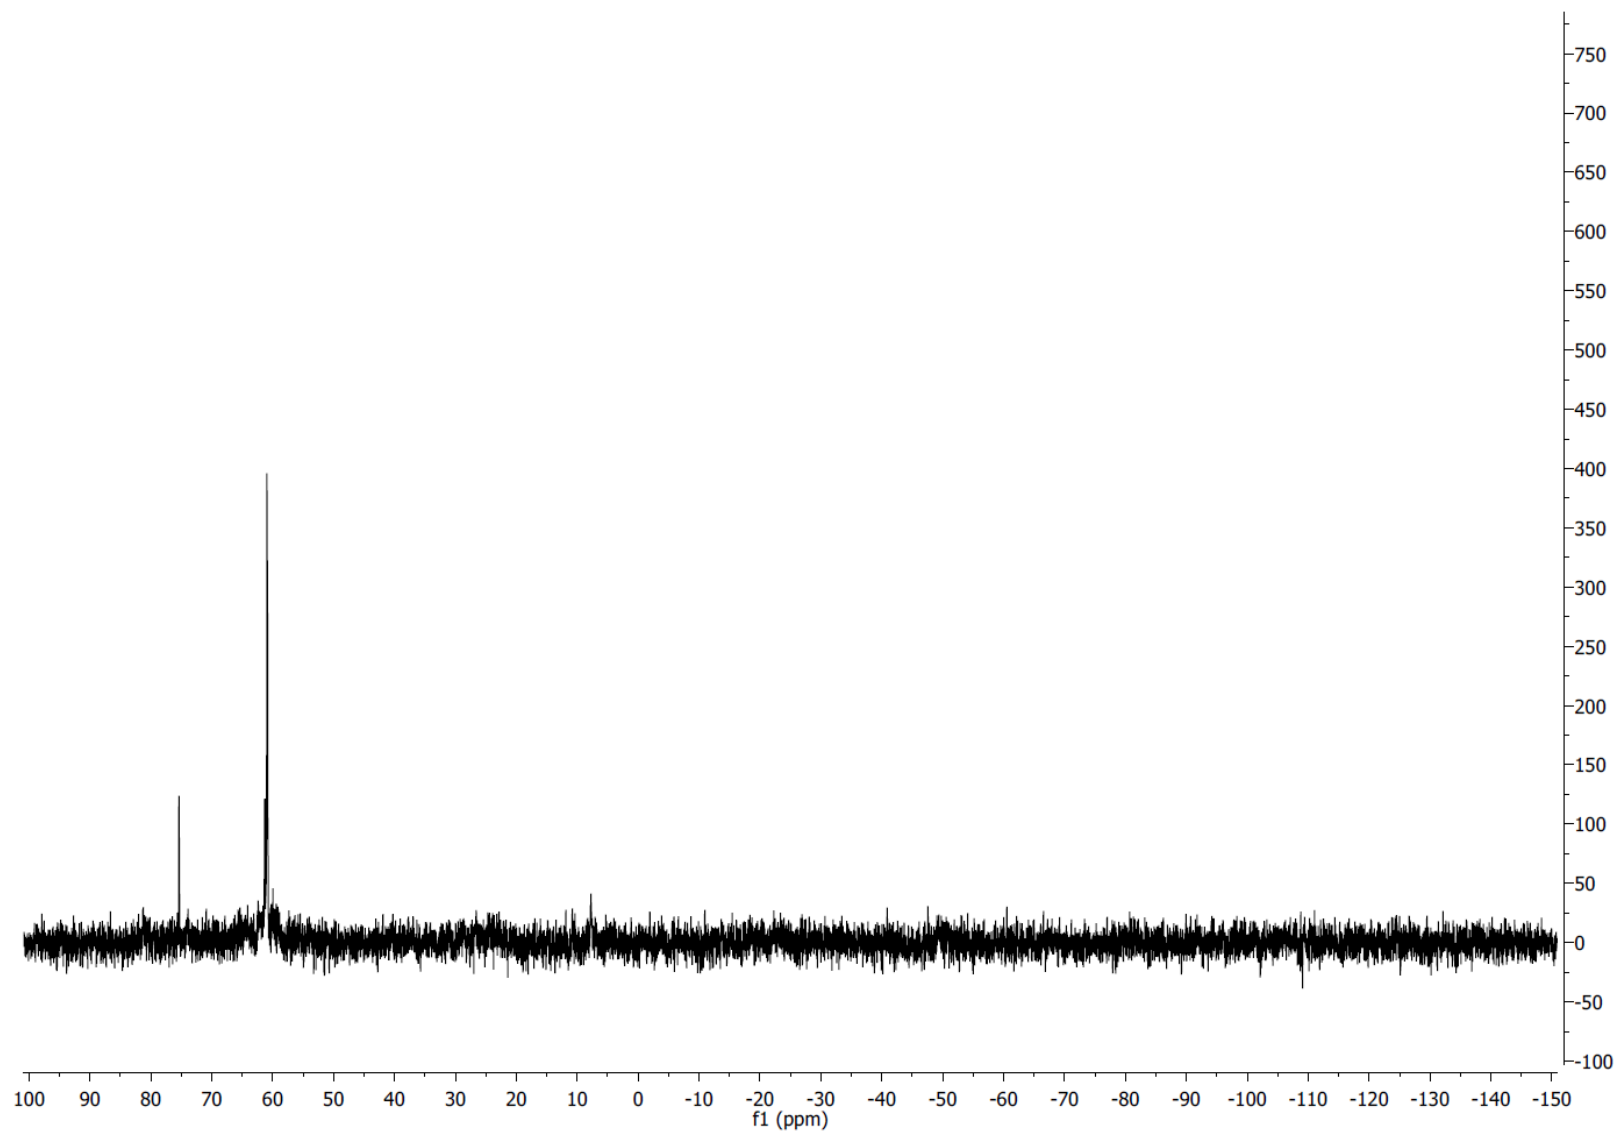

**Figure S23:**  $^{31}\text{P}\{^1\text{H}\}$  NMR (162 MHz, 298 K,  $\text{C}_6\text{D}_6/\text{THF}$  9:1) of  $\text{Fe}(\text{Cl})_2(\text{dmpe})_2$  (**1**) (8.9  $\mu\text{mol}$ ) treated by 10 equiv. of  $\text{K}(\text{hmds})$  after 22 h at 20  $^\circ\text{C}$ .

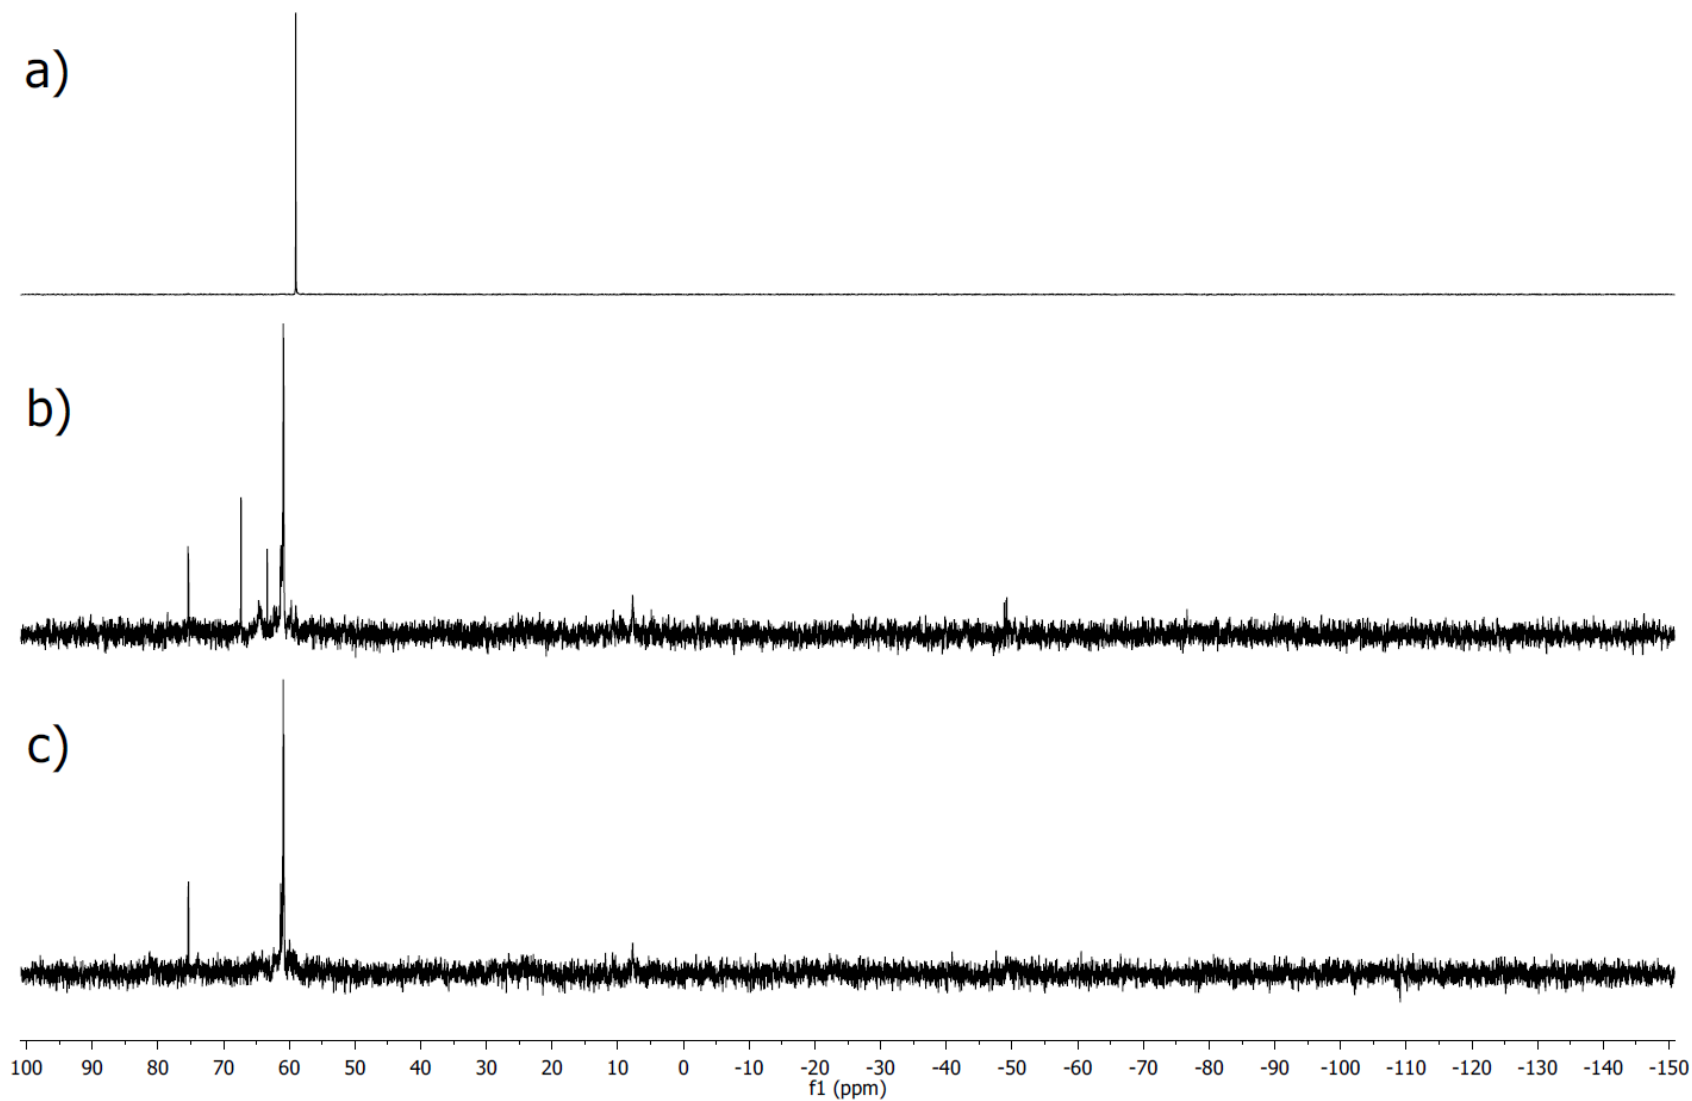

**Figure S24:**  $^{31}\text{P}\{^1\text{H}\}$  NMR (162 MHz, 298 K,  $\text{C}_6\text{D}_6/\text{THF}$  9:1) of  $\text{Fe}(\text{Cl})_2(\text{dmpe})_2$  (**1**) treated by 10 equiv. of  $\text{M}(\text{hmds})$  after 22 h at 20 °C.  $\text{M} = \text{Li}$  (a),  $\text{Na}$  (b) and  $\text{K}$  (c).

a)

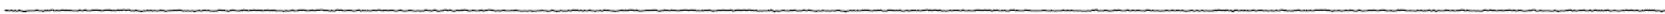

b)

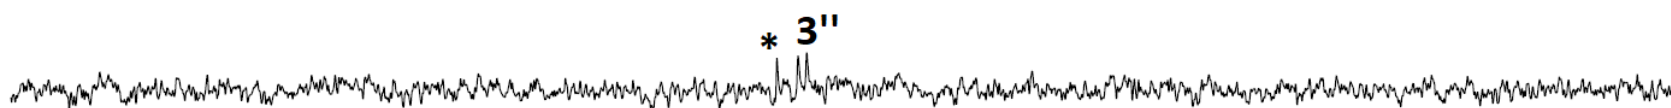

c)

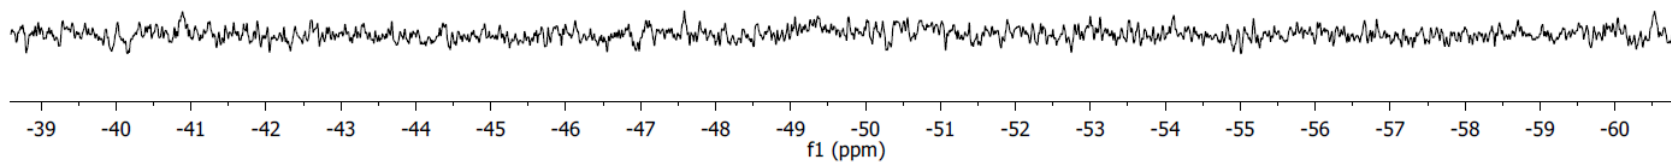

**Figure S25:** -40 ppm to -60 ppm area  $^{31}\text{P}\{^1\text{H}\}$  NMR (162 MHz, 298 K,  $\text{C}_6\text{D}_6/\text{THF}$  9:1) of  $\text{Fe}(\text{Cl})_2(\text{dmpe})_2$  (**1**) treated by 10 equiv. of  $\text{M}(\text{hmds})$  after 22 h at 20 °C.  $\text{M} = \text{Li}$  (a),  $\text{Na}$  (b) and  $\text{K}$  (c); \* = free dmpe and  $\text{Fe}^0(\text{dmpe})_3$  (**3''**).

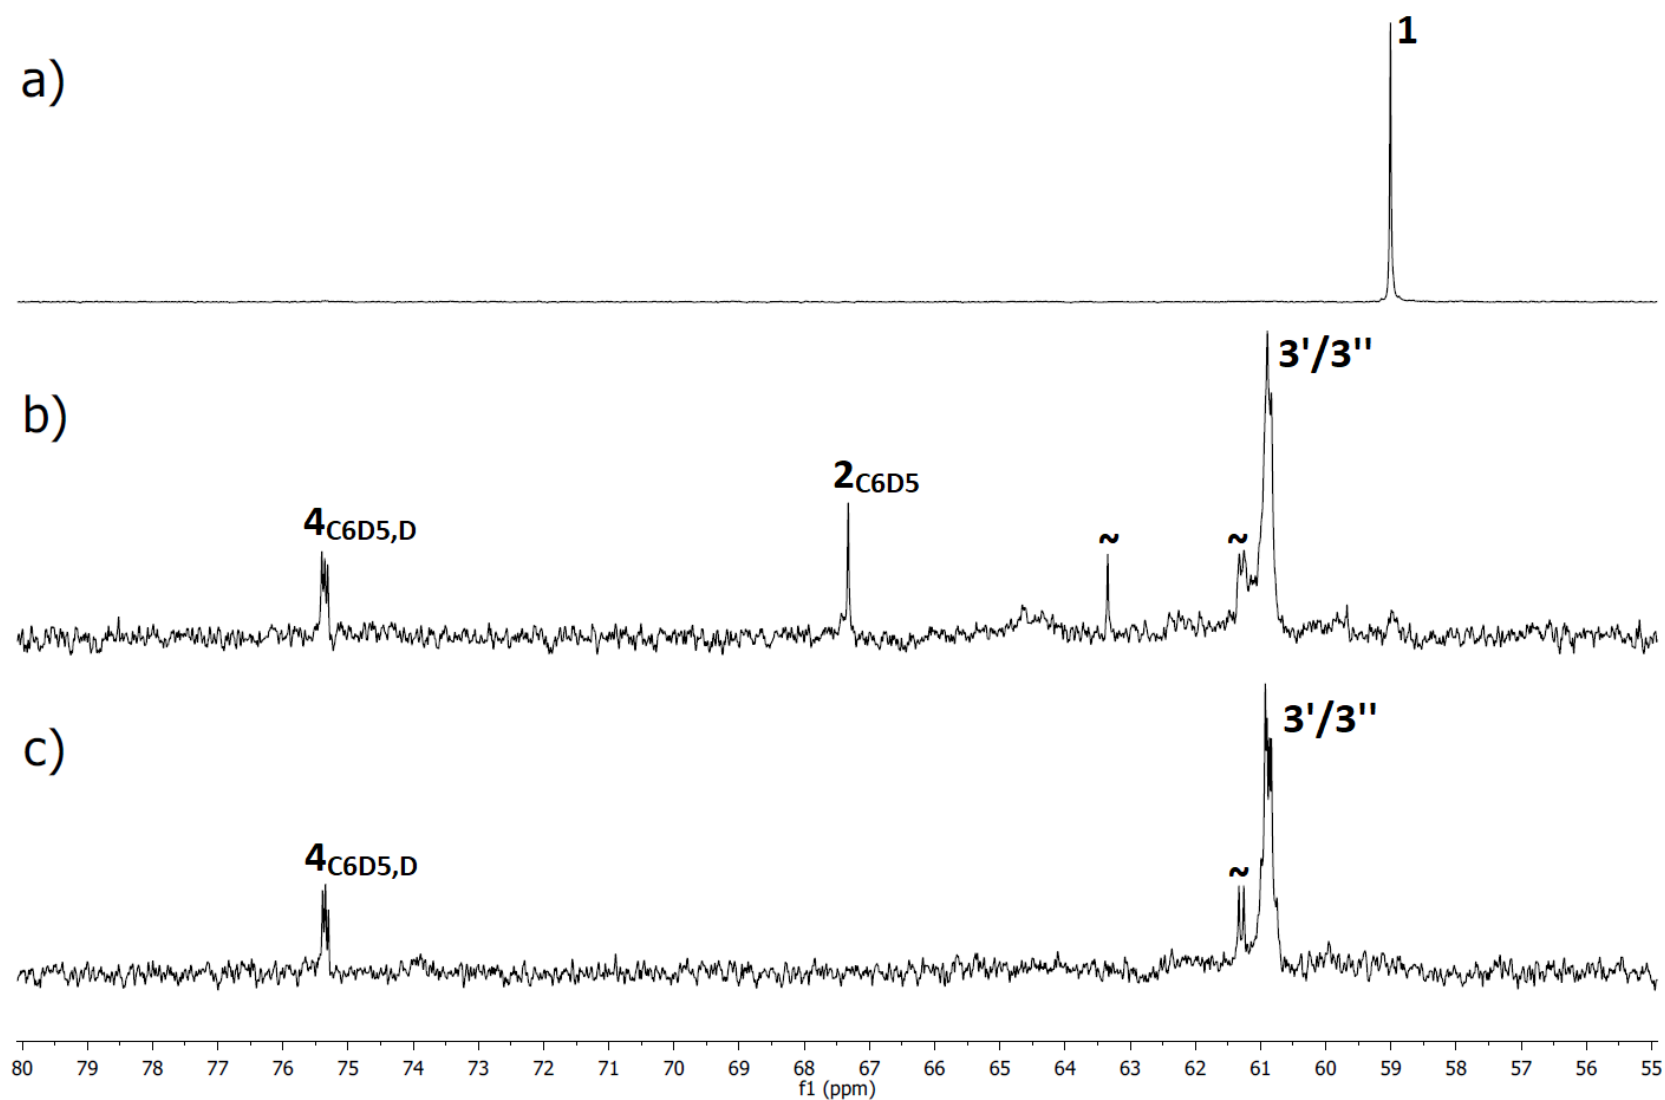

**Figure S26:** 80 ppm to 55 ppm area  $^{31}\text{P}\{^1\text{H}\}$  NMR (162 MHz, 298 K,  $\text{C}_6\text{D}_6/\text{THF}$  9:1) of  $\text{Fe}(\text{Cl})_2(\text{dmpe})_2$  (**1**) treated by 10 equiv. of  $\text{M}(\text{hmde})$  after 22 h at 20 °C.  $\text{M} = \text{Li}$  (a),  $\text{Na}$  (b) and  $\text{K}$  (c);  $\text{Fe}^0_2(\text{dmpe})_5$  (**3'**);  $\text{Fe}^0(\text{dmpe})_3$  (**3''**); *trans*-  $\text{Fe}(\text{D})(\text{C}_6\text{D}_5)(\text{dmpe})_2$  (**4<sub>C6D5,D</sub>**);  $\text{FeCl}(\text{C}_6\text{D}_5)(\text{dmpe})_2$  (**2<sub>C6D5</sub>**) and (~) = unknown species **3\***.



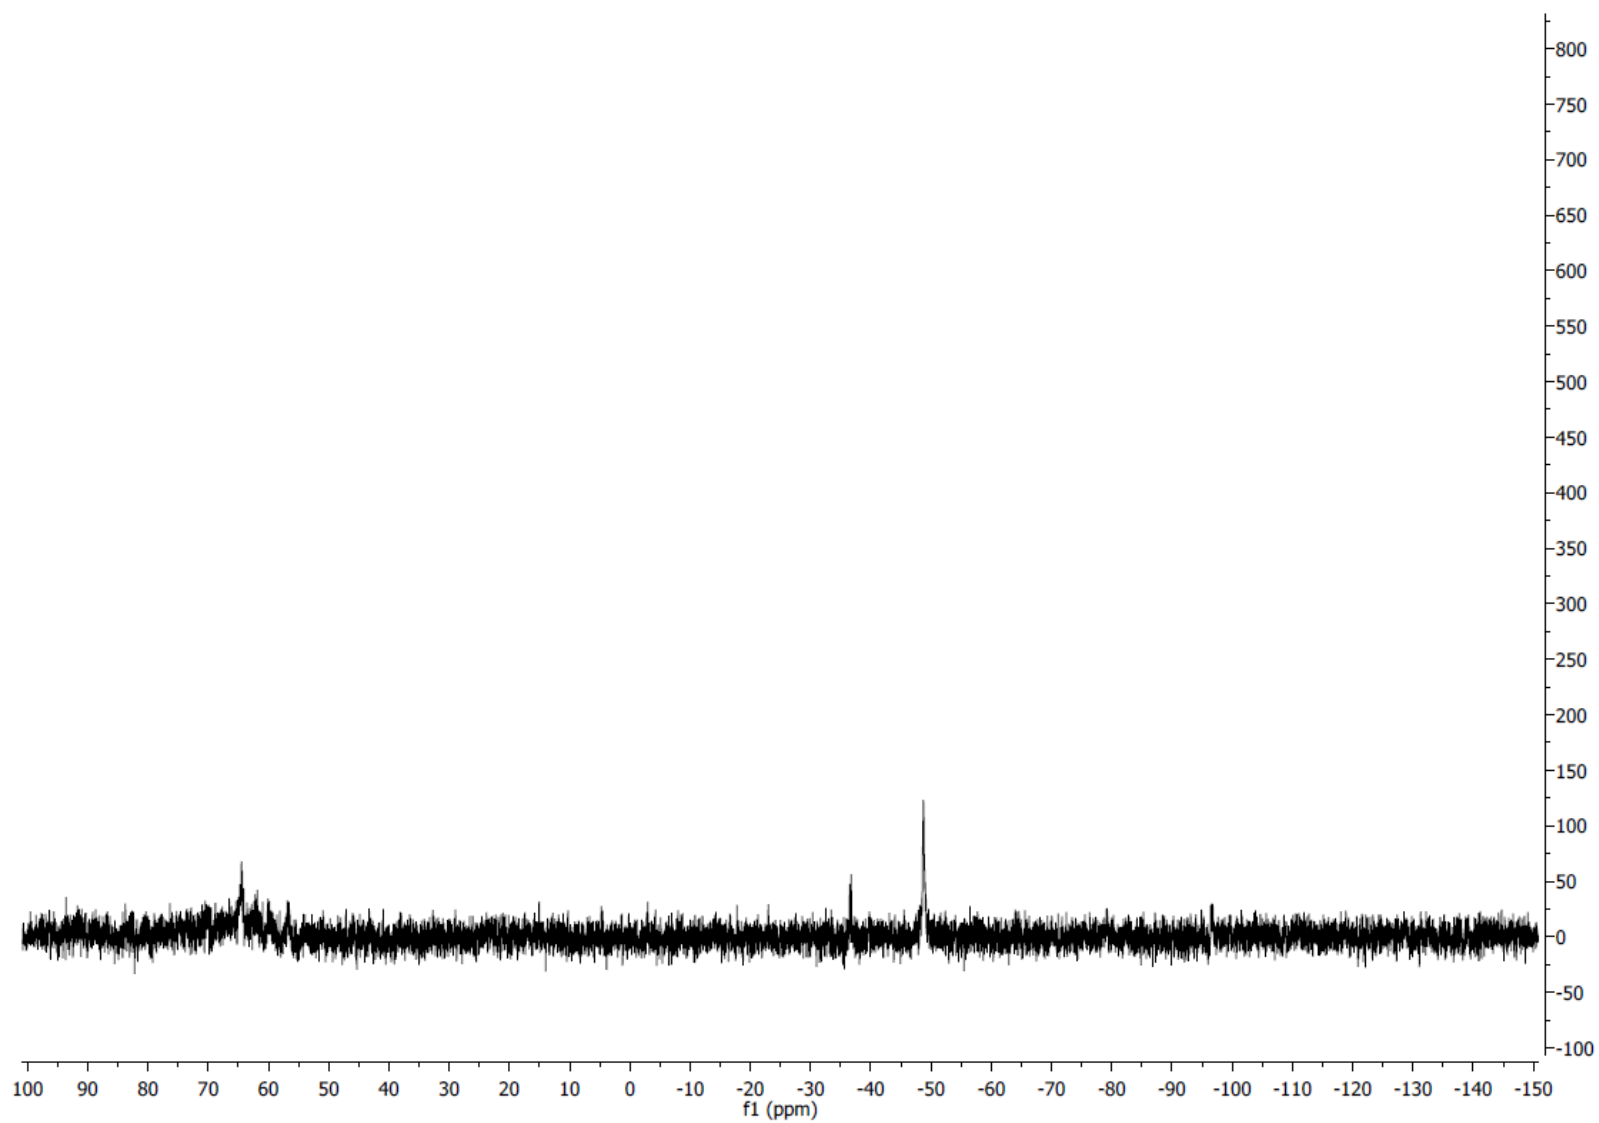

**Figure S27:**  $^{31}\text{P}\{^1\text{H}\}$  NMR (162 MHz, 298 K,  $\text{C}_6\text{D}_6/\text{THF}$  9:1) of  $\text{Fe}(\text{Cl})_2(\text{dmpe})_2$  (**1**) (8.7  $\mu\text{mol}$ ) treated by 10 equiv. of  $\text{Li}(\text{hmds})$  after 22 h at 80  $^\circ\text{C}$ .

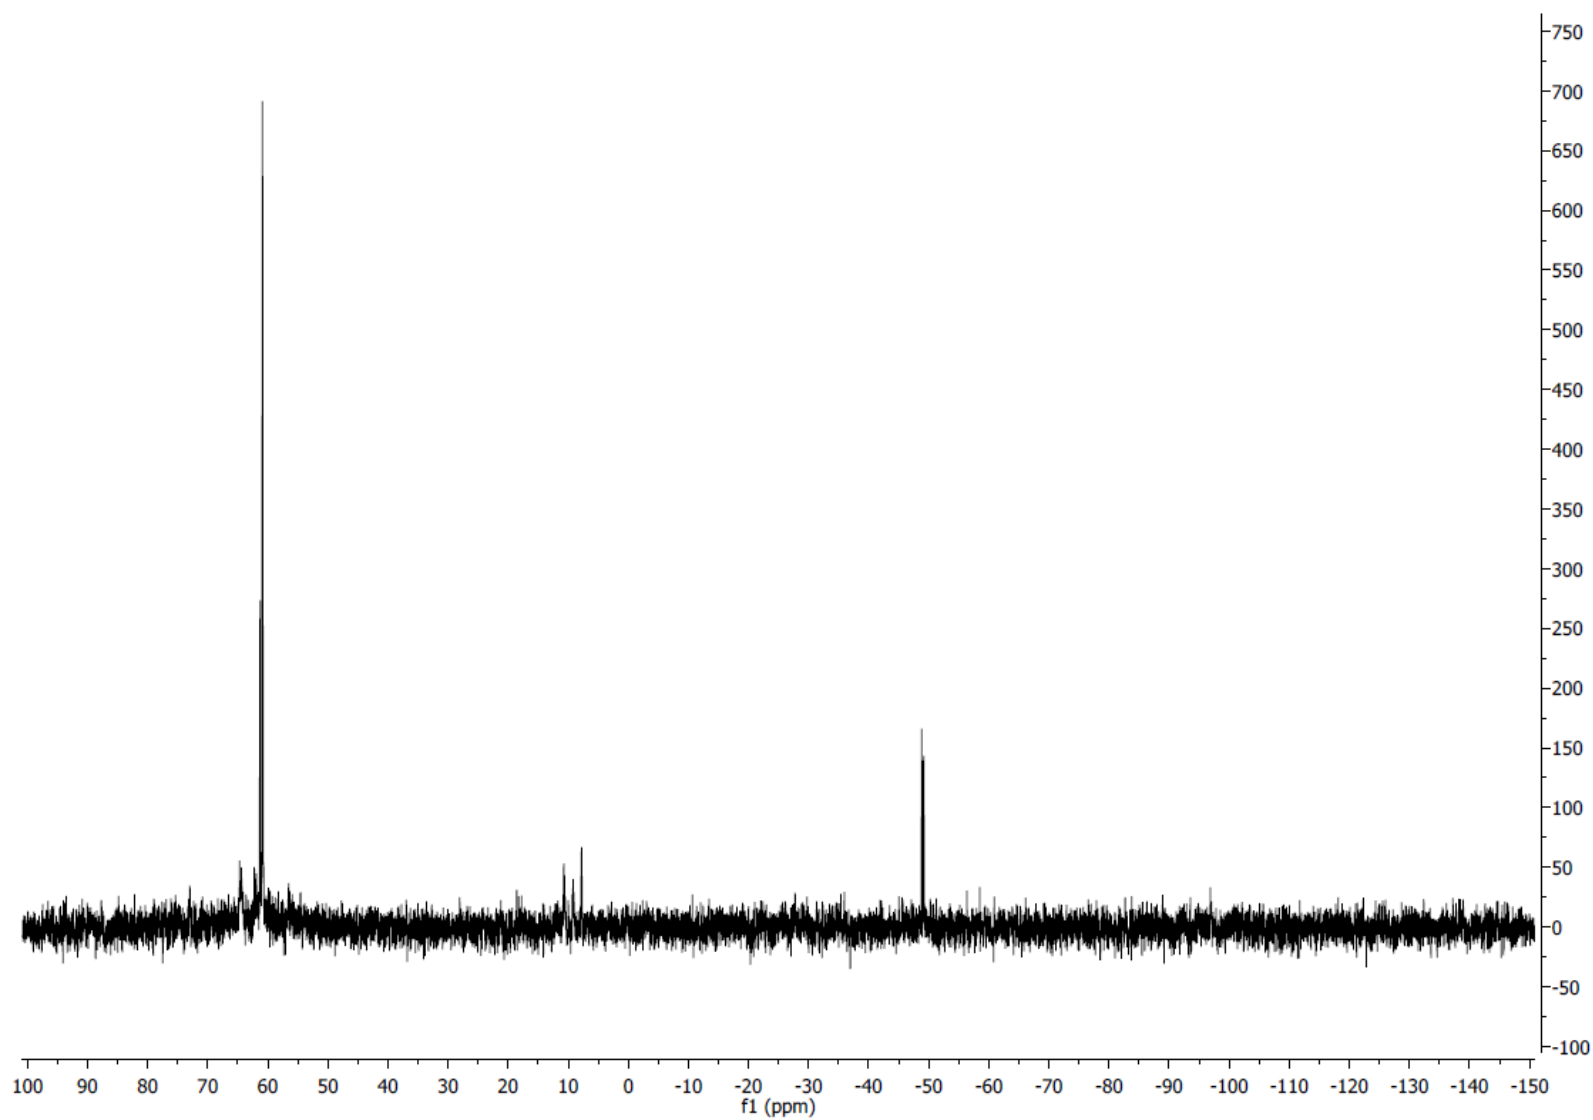

**Figure S28:**  $^{31}\text{P}\{^1\text{H}\}$  NMR (162 MHz, 298 K,  $\text{C}_6\text{D}_6/\text{THF}$  9:1) of  $\text{Fe}(\text{Cl})_2(\text{dmpe})_2$  (**1**) (8.9  $\mu\text{mol}$ ) treated by 10 equiv. of  $\text{Na}(\text{hmde})$  after 22 h at 80  $^\circ\text{C}$ .

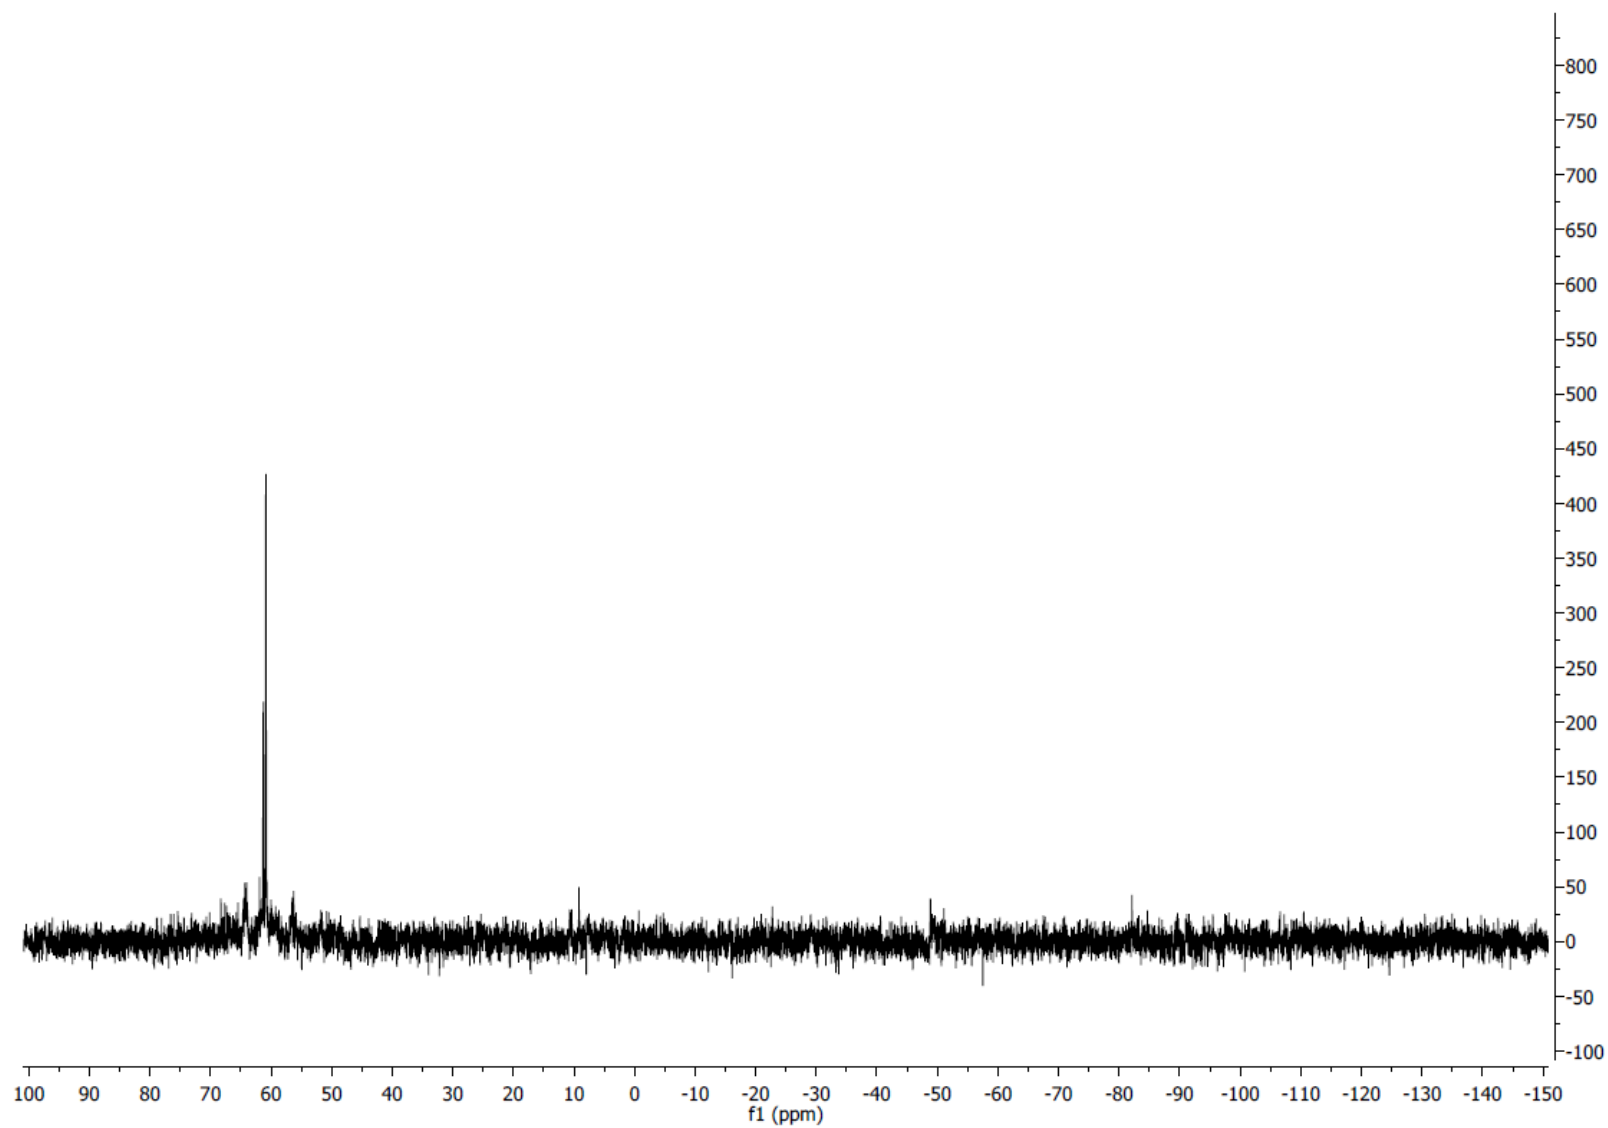

**Figure S29:**  $^{31}\text{P}\{^1\text{H}\}$  NMR (162 MHz, 298 K,  $\text{C}_6\text{D}_6/\text{THF}$  9:1) of  $\text{Fe}(\text{Cl})_2(\text{dmpe})_2$  (**1**) (8.9  $\mu\text{mol}$ ) treated by 10 equiv. of  $\text{K}(\text{hmds})$  after 22 h at 80  $^\circ\text{C}$ .

a)

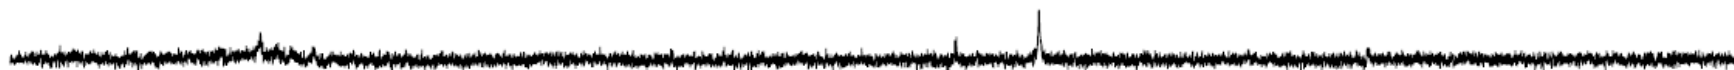

b)

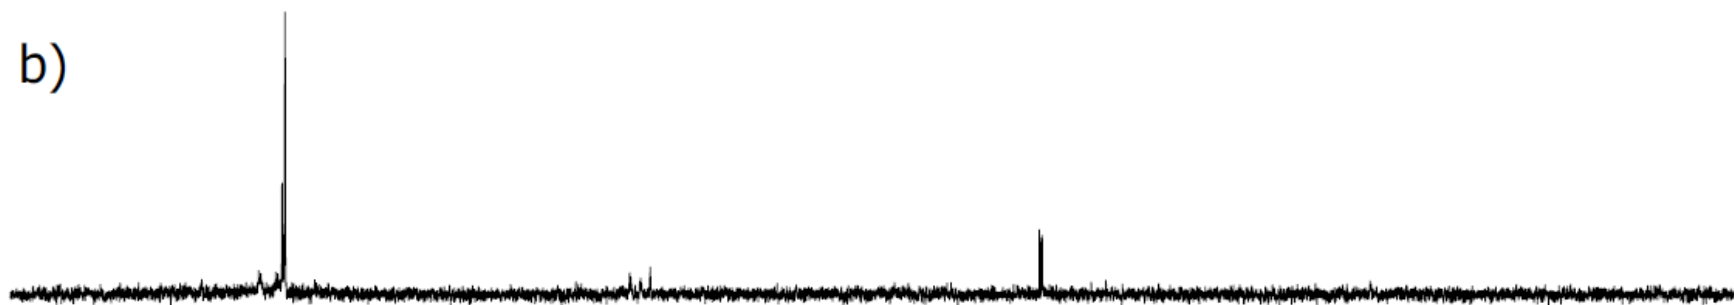

c)

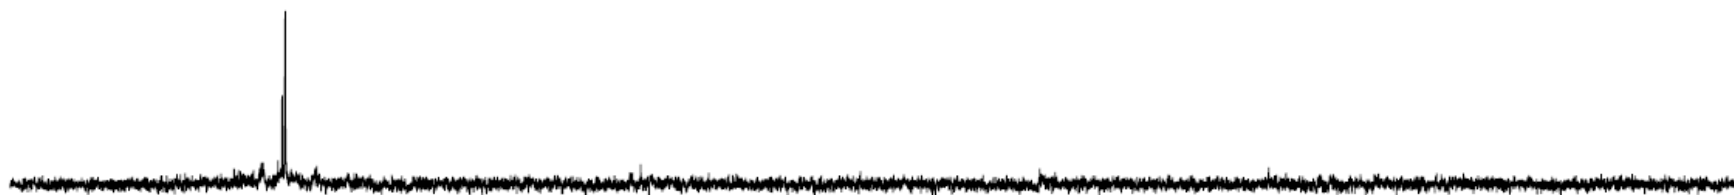

100 90 80 70 60 50 40 30 20 10 0 -10 -20 -30 -40 -50 -60 -70 -80 -90 -100 -110 -120 -130 -140 -150  
f1 (ppm)

**Figure S30:**  $^{31}\text{P}\{^1\text{H}\}$  NMR (162 MHz, 298 K,  $\text{C}_6\text{D}_6/\text{THF}$  9:1) of  $\text{Fe}(\text{Cl})_2(\text{dmpe})_2$  (**1**) treated by 10 equiv. of  $\text{M}(\text{hmds})$  after 22 h at 80 °C.  $\text{M} = \text{Li}$  (a),  $\text{Na}$  (b) and  $\text{K}$  (c).

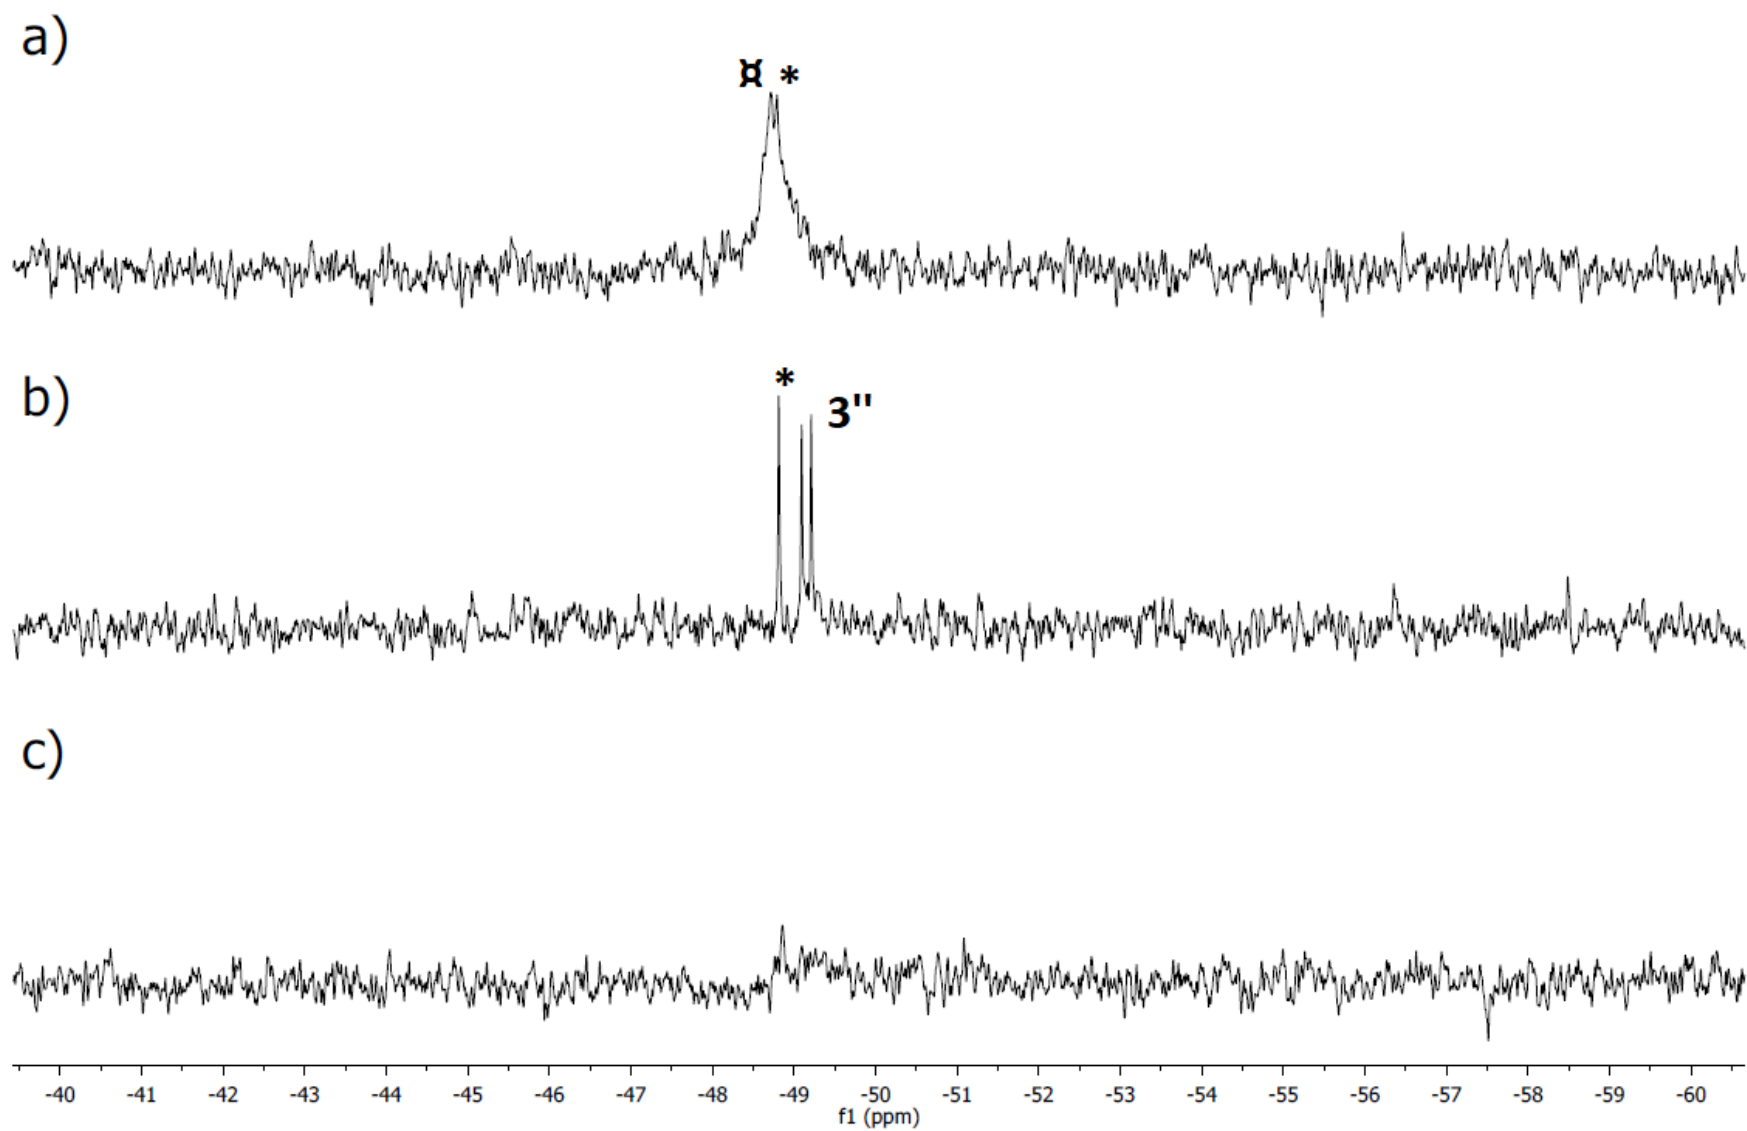

**Figure S31:** -40 ppm to -60 ppm area  $^{31}\text{P}\{^1\text{H}\}$  NMR (162 MHz, 298 K,  $\text{C}_6\text{D}_6/\text{THF}$  9:1) of  $\text{Fe}(\text{Cl})_2(\text{dmpe})_2$  (**1**) treated by 10 equiv. of  $\text{M}(\text{hmde})$  after 22 h at 80 °C.  $\text{M} = \text{Li}$  (a),  $\text{Na}$  (b) and  $\text{K}$  (c); \* = free  $\text{dmpe}$ ,  $\square^*$  =  $[\text{dmpe}\cdot\text{Li}^+]$  adduct and  $\text{Fe}^0(\text{dmpe})_3$  (**3''**).

a)

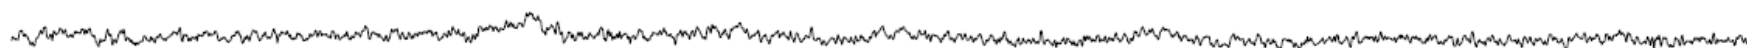

b)

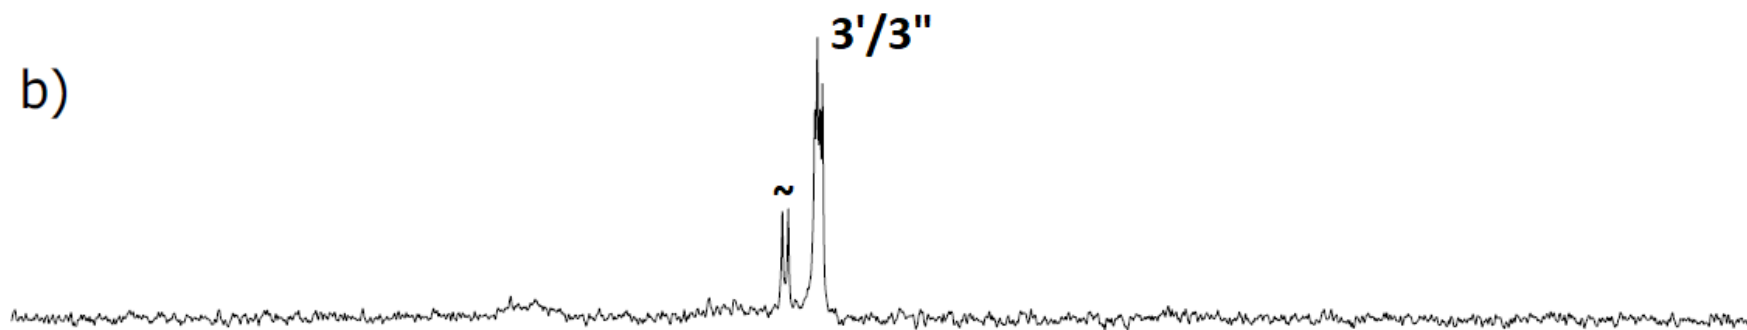

c)

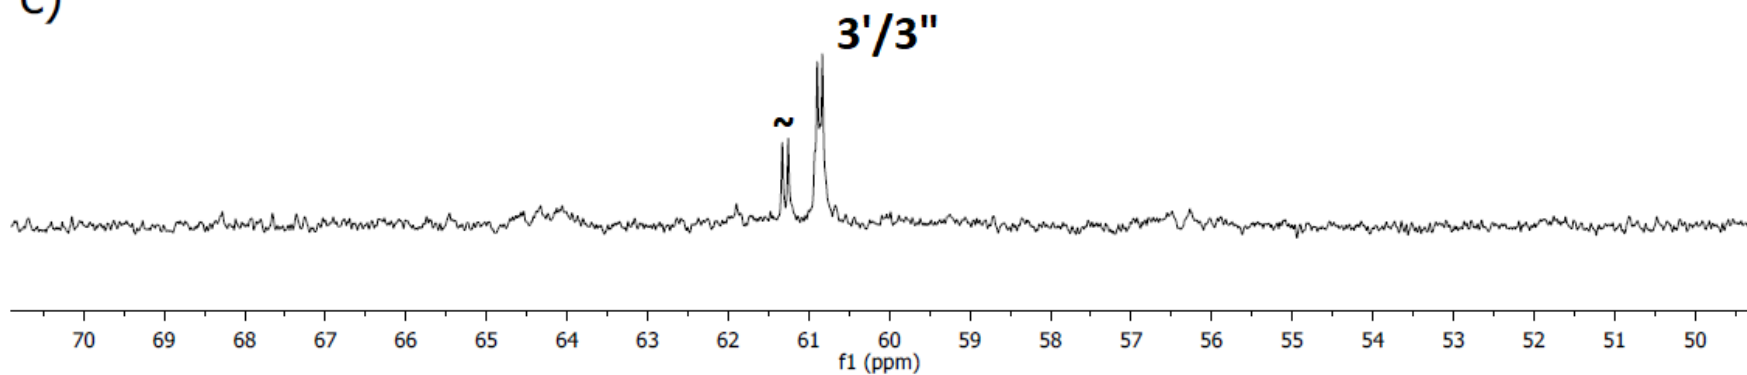

**Figure S32:** 70 ppm to 50 ppm area  $^{31}\text{P}\{^1\text{H}\}$  NMR (162 MHz, 298 K,  $\text{C}_6\text{D}_6/\text{THF}$  9:1) of  $\text{Fe}(\text{Cl})_2(\text{dmpe})_2$  (**1**) treated by 10 equiv. of  $\text{M}(\text{hmds})$  after 22 h at 80 °C.  $\text{M} = \text{Li}$  (a),  $\text{Na}$  (b) and  $\text{K}$  (c);  $\text{Fe}^0_2(\text{dmpe})_5$  (**3'**);  $\text{Fe}^0(\text{dmpe})_3$  (**3''**) and (~) = unknown species **3\***.

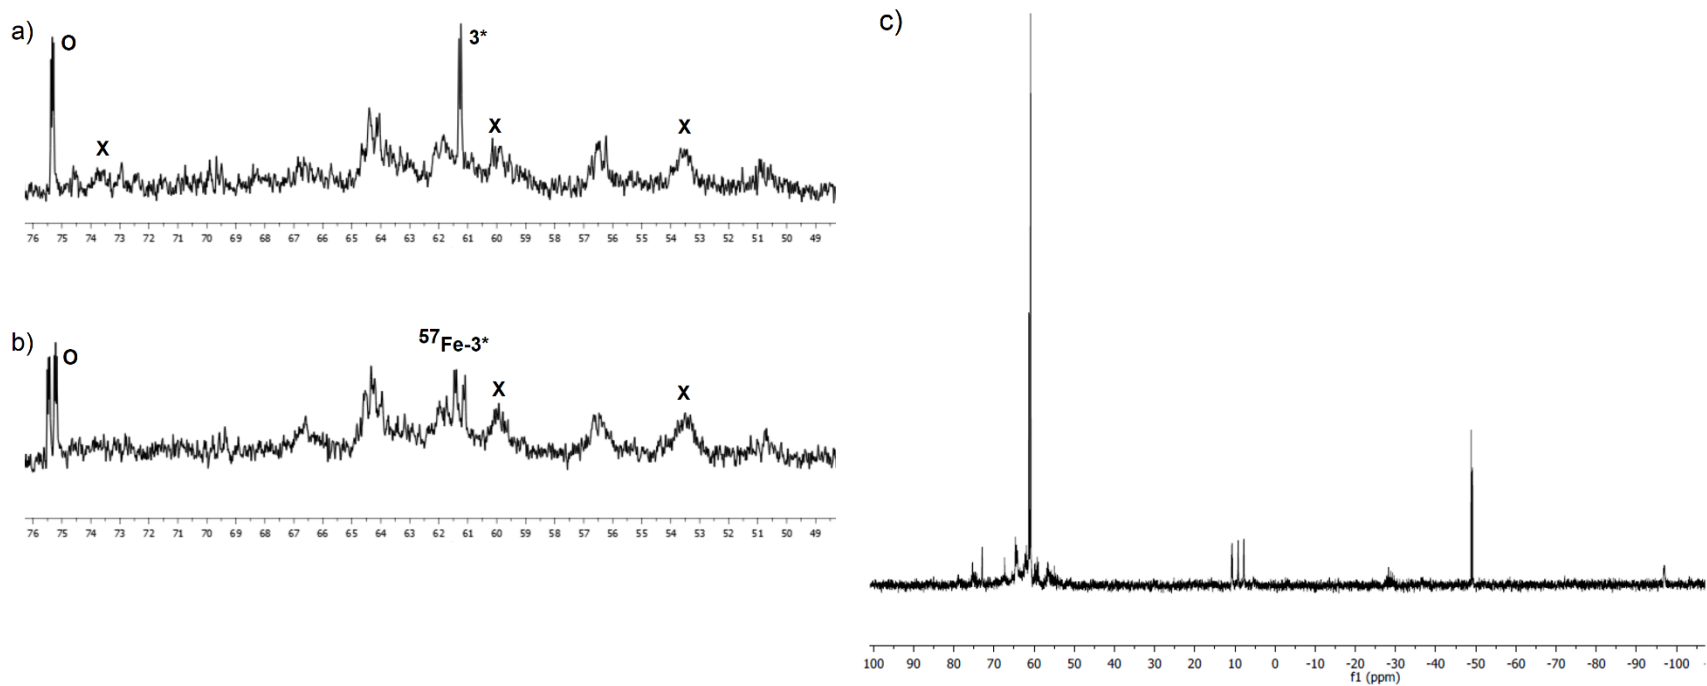

**Figure S33:**  $^{31}\text{P}\{^1\text{H}\}$  NMR (162 MHz, 298 K,  $\text{C}_6\text{D}_6/\text{THF}$  9:1) of  $\text{Fe}(\text{Cl})_2(\text{dmpe})_2$  (**1**) (9.4  $\mu\text{mol}$ ) treated by 10 equiv.  $\text{Li}(\text{hmds})$  after 22 h at 80  $^\circ\text{C}$  followed by 10 additional hours at 20  $^\circ\text{C}$  (a); same than (a) but with  $^{57}\text{Fe}$ -**1** as starting material (b);  $\text{Fe}(\text{Cl})_2(\text{dmpe})_2$  (**1**) (9.4  $\mu\text{mol}$ ) treated by 10 equiv. of  $\text{Na}(\text{hmds})$  after 22 h at 80  $^\circ\text{C}$  then cooled 72 h at room temperature (c); *trans*- (**O**) and *cis*- (**X**)  $\text{Fe}(\text{D})(\text{C}_6\text{D}_5)(\text{dmpe})_2$  (**4C6D5,D**).

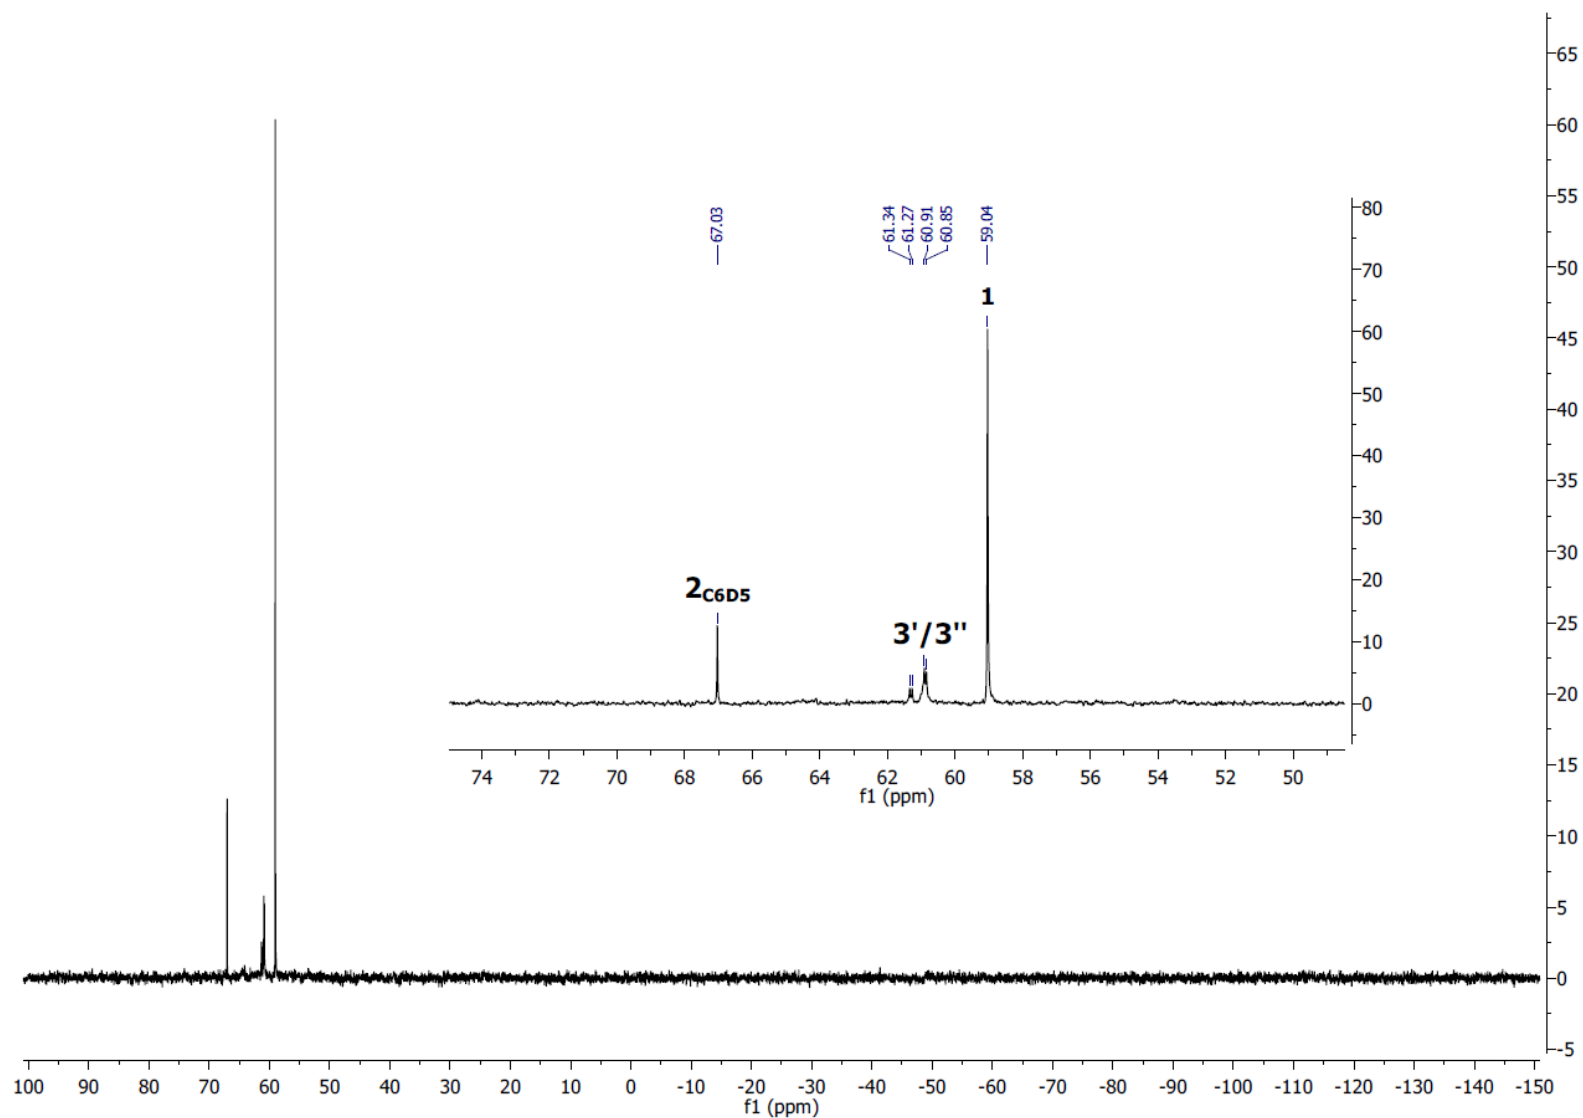

**Figure S34:**  $^{31}\text{P}\{^1\text{H}\}$  NMR (162 MHz, 298 K,  $\text{C}_6\text{D}_6$ ) of  $\text{Fe}(\text{Cl})_2(\text{dmpe})_2$  (**1**) (9.4  $\mu\text{mol}$ ) treated by 2 equiv. of  $\text{Li}(\text{hmds})$  and 2 equiv. of 15-C-5 after 72 h at 20  $^\circ\text{C}$ . It shows the presence of  $\text{FeCl}(\text{C}_6\text{D}_5)(\text{dmpe})_2$  ( $2\text{C}_6\text{D}_5$ ), starting  $\text{Fe}(\text{Cl})_2(\text{dmpe})_2$  (**1**) and  $\text{Fe}^0$  species ( $3'/3''$ ).



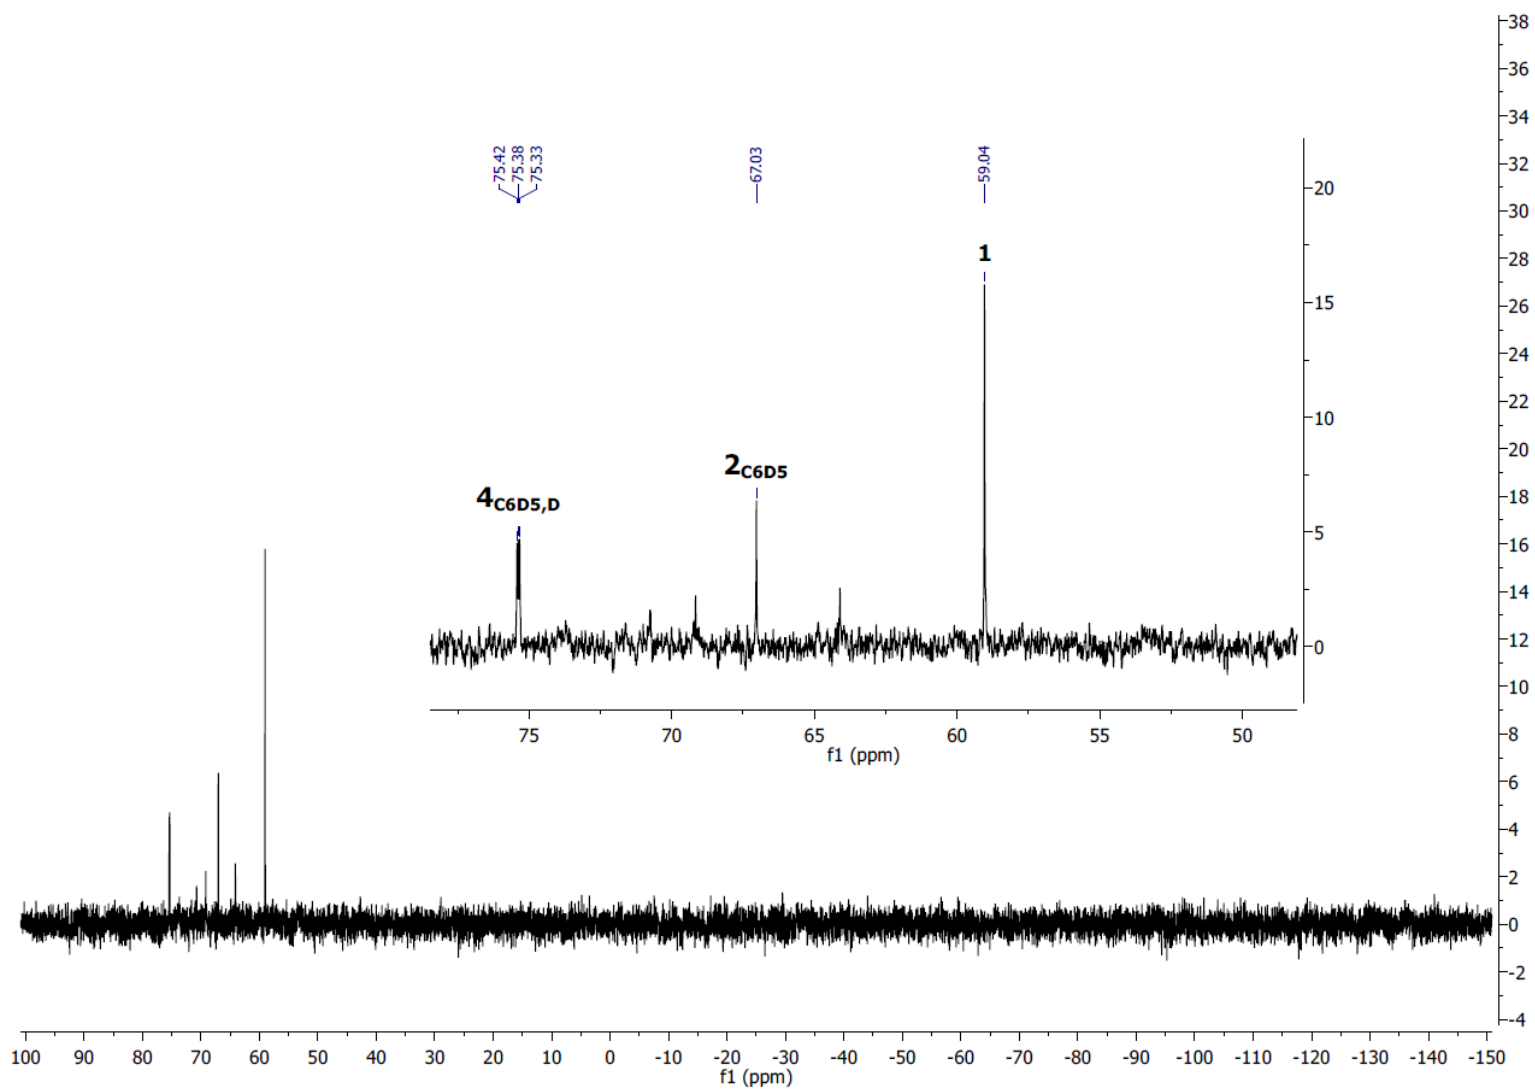

**Figure S35:**  $^{31}\text{P}\{^1\text{H}\}$  NMR (162 MHz, 298 K,  $\text{C}_6\text{D}_6$ ) of  $\text{Fe}(\text{Cl})_2(\text{dmpe})_2$  (**1**) (9.4  $\mu\text{mol}$ ) treated by 2 equiv. of  $\text{Li}(\text{hmde})$  and 2 equiv. of 15-C-5 after 72 h upon photolysis (350 nm). It shows the presence of  $\text{FeCl}(\text{C}_6\text{D}_5)(\text{dmpe})_2$  (**2 $\text{C}_6\text{D}_5$** ), starting  $\text{Fe}(\text{Cl})_2(\text{dmpe})_2$  (**1**) and *trans*- $\text{Fe}(\text{D})(\text{C}_6\text{D}_5)(\text{dmpe})_2$  (**4 $\text{C}_6\text{D}_5,\text{D}$** ).

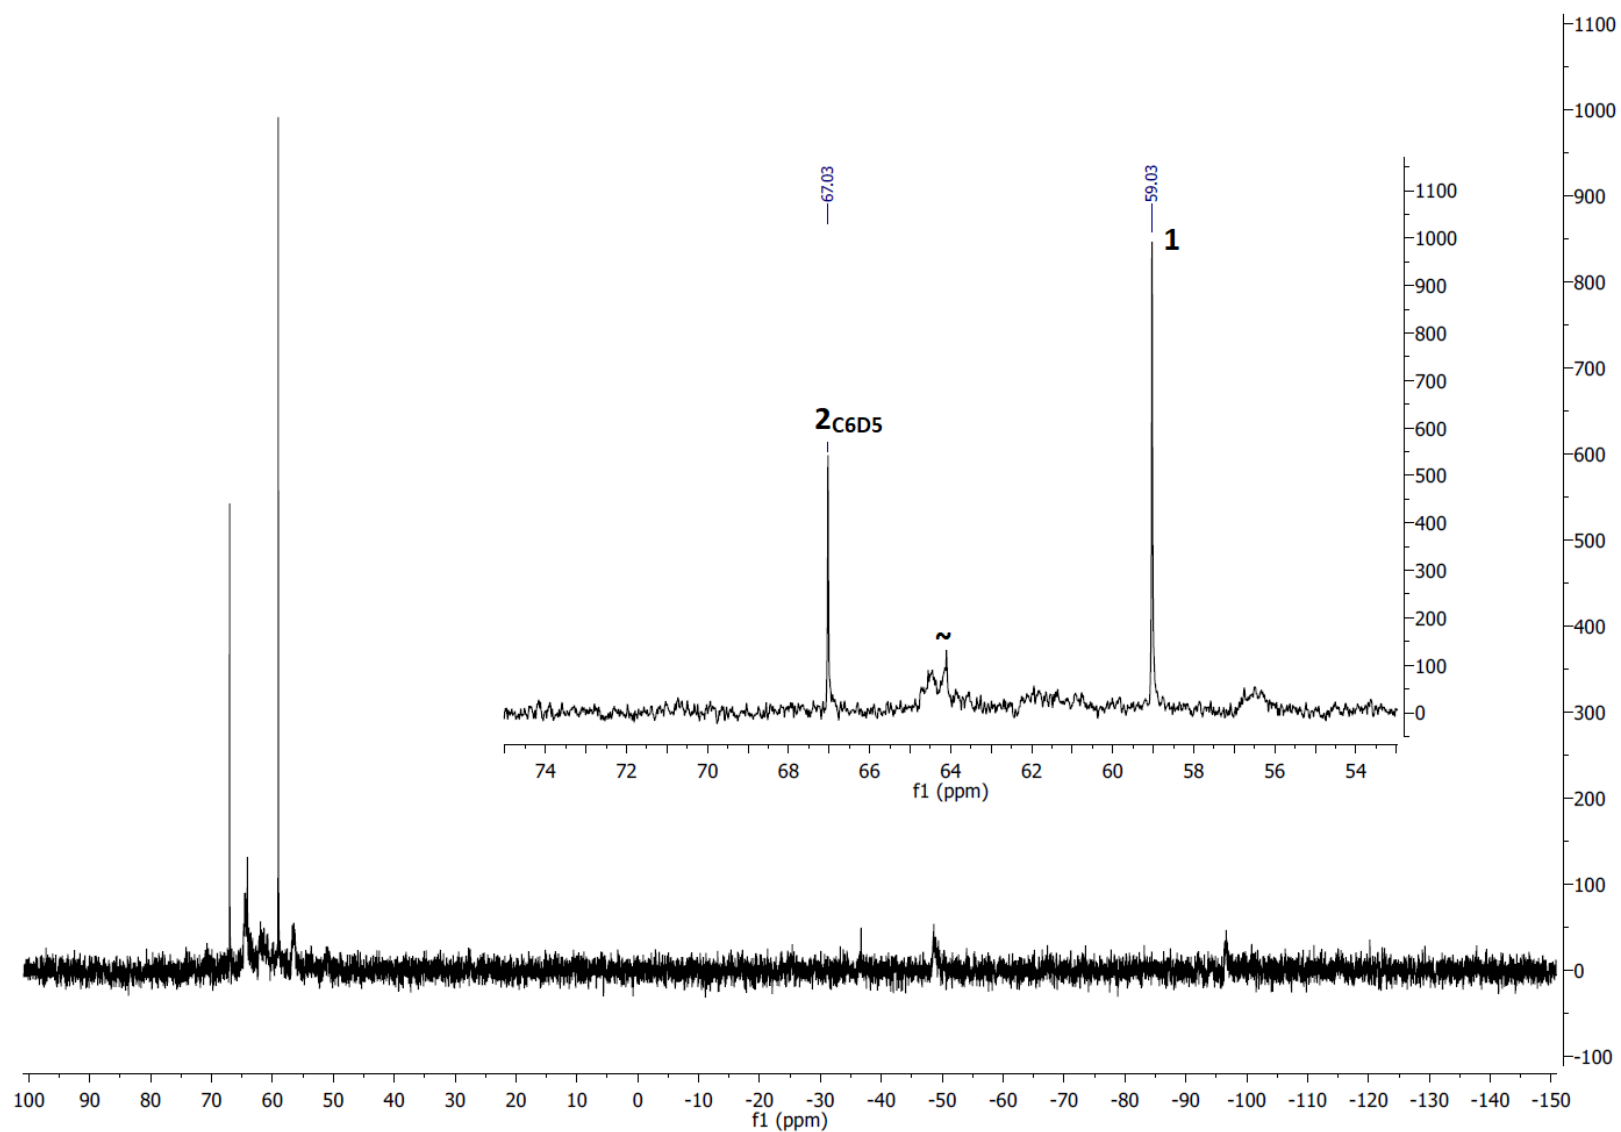

**Figure S36:**  $^{31}\text{P}\{^1\text{H}\}$  NMR (162 MHz, 298 K,  $\text{C}_6\text{D}_6$ ) of  $\text{Fe}(\text{Cl})_2(\text{dmpe})_2$  (**1**) (9.4  $\mu\text{mol}$ ) treated by 2 equiv. of  $\text{Li}(\text{hmds})$  and 2 equiv. of 15-C-5 after 22 h at 80  $^\circ\text{C}$ . It shows the presence of  $\text{FeCl}(\text{C}_6\text{D}_5)(\text{dmpe})_2$  (**2C<sub>6</sub>D<sub>5</sub>**), starting  $\text{Fe}(\text{Cl})_2(\text{dmpe})_2$  (**1**) and unknown species (~).

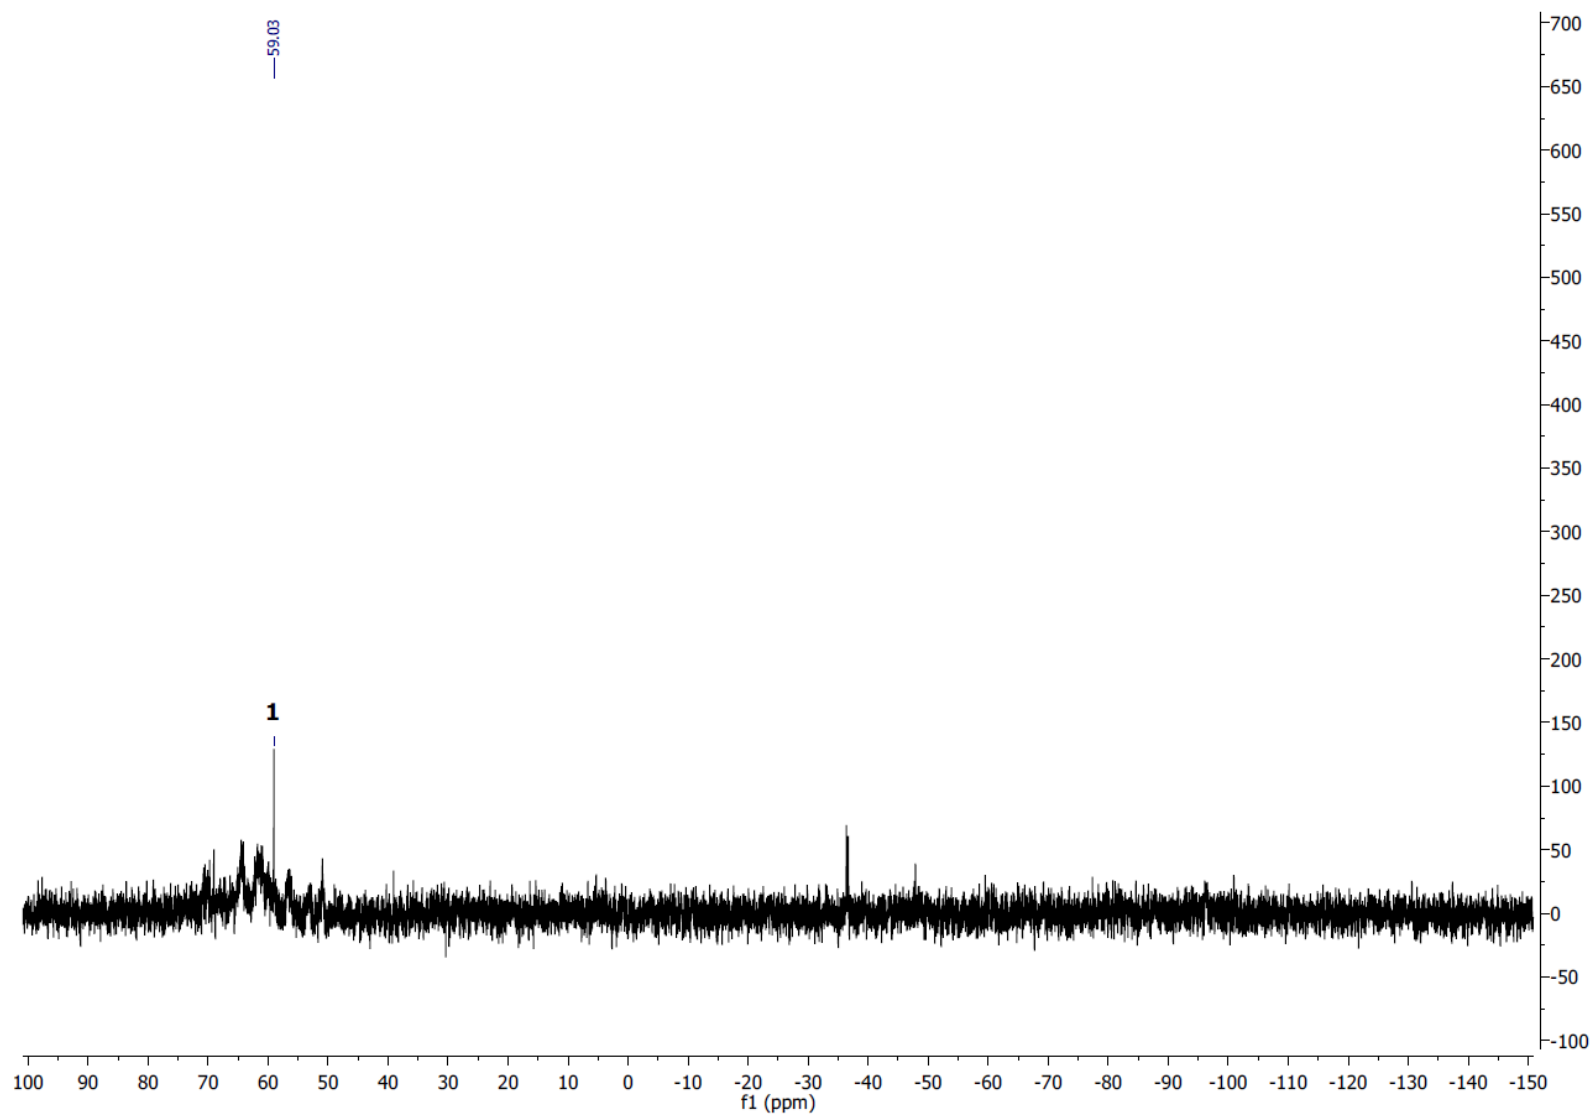

**Figure S37:**  $^{31}\text{P}\{^1\text{H}\}$  NMR (162 MHz, 298 K,  $\text{C}_6\text{D}_6$ ) of  $\text{Fe}(\text{Cl})_2(\text{dmpe})_2$  (**1**) (8.4  $\mu\text{mol}$ ) treated by 2 equiv. of  $\text{Li}(\text{hmnds})$  after 22 h at 80  $^\circ\text{C}$ . It shows the presence of starting  $\text{Fe}(\text{Cl})_2(\text{dmpe})_2$  (**1**) and unknown species.

## 4) Catalytic applications

### a) General procedure for cross-coupling reactions with $n\text{-C}_{12}\text{H}_{25}\text{I}$ and iodocyclohexane

All the cross-coupling reactions discussed in the main article, involving either benzene or fluorobenzene (PhF), were carried out using the following procedure (Figure S38a). Yields were determined by both GC-MS (optimization and screening and the conditions) and NMR analysis of the purified products. NMR analysis for Ph( $n\text{-C}_{12}\text{H}_{25}$ ) and Ph(cyclohexyl) match with reported data.[R5] The  $^{19}\text{F}$  NMR spectrum of the purified fraction containing the three isomers formed by cross-coupling attempt between PhF and  $n\text{-C}_{12}\text{H}_{25}\text{I}$  is given in Figure S38b.

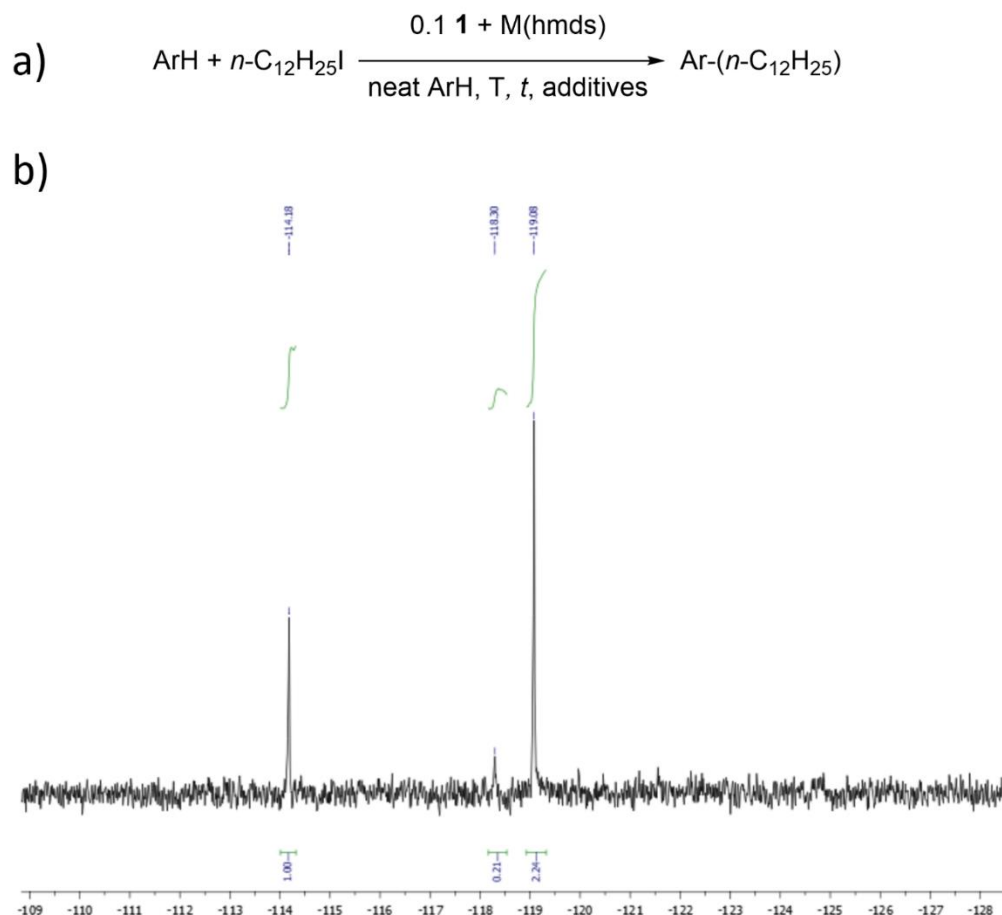

**Figure S38:** Cross-coupling between ArH and  $n\text{-C}_{12}\text{H}_{25}\text{I}$  mediated by **1** in the presence of M(hm ds) (a);  $^{19}\text{F}$  NMR spectrum ( $\text{CDCl}_3$ , 377 MHz) of the purified mixture of cross-coupling products between PhF and  $n\text{-C}_{12}\text{H}_{25}\text{I}$  ( $\delta = -119.1$  (*ortho*, 65%);  $-114.2$  (*meta*, 29%);  $-118.3$  (*para*, 6%)) (b).

*General coupling procedure for GC-MS-monitored coupling experiments :*

The reaction with  $\text{Fe}(\text{Cl})_2(\text{dmpe})_2$  (**1**) and  $\text{Li}(\text{hmde})$  at 80 °C is given as an example (main article, Table 3, Entry 2). In an argon-filled glove box, a 12 mL vial equipped with a magnetic stir bar was loaded with  $\text{Fe}(\text{Cl})_2(\text{dmpe})_2$  (3.5 mg, 8.4  $\mu\text{mol}$ , 0.1 equiv.), ArH (1.5 mL) and decane as an internal standard for GC-MS analysis. The mixture was placed under stirring and  $n\text{-C}_{12}\text{H}_{25}\text{I}$  (20.2  $\mu\text{L}$ , 82  $\mu\text{mol}$ , 1 equiv.) was added dropwise followed by  $\text{Li}(\text{hmde})$  (15.0 mg, 82  $\mu\text{mol}$ , 1 equiv.). The color of the reaction medium gradually changed from emerald green to yellow/orange. The reaction mixture was stirred for 5 min and transferred into an NMR tube fitted with a J.Young valve. The tube was placed in an oil bath at 80°C and left for 72 h. The color turned pale yellow. The tube was cooled to room temperature and quenched with 2 mL of  $\text{H}_2\text{O}$ . The solution was extracted with 2 mL of MTBE and analyzed by GC-MS.

*Procedure and analytical data for cross-coupling between benzene and  $n\text{-C}_{12}\text{H}_{25}\text{I}$ :*

In an argon-filled glove box, a 50 mL J. Young flask equipped with a magnetic stir bar was loaded with  $\text{Fe}(\text{Cl})_2(\text{dmpe})_2$  (43.9 mg, 102.8  $\mu\text{mol}$ , 0.1 equiv.),  $\text{C}_6\text{H}_6$  (16 mL) and decane as an internal standard for GC-MS analysis. The mixture was placed under stirring and  $n\text{-C}_{12}\text{H}_{25}\text{I}$  (253.6  $\mu\text{L}$ , 1028  $\mu\text{mol}$ , 1 equiv.) was added dropwise followed by  $\text{Li}(\text{hmde})$  (172.0 mg, 1028  $\mu\text{mol}$ , 1 equiv.). The color of the reaction medium gradually changed from emerald green to yellow/brown. The reaction mixture was stirred for 5 min at room temperature then placed in an oil bath at 80°C and left for 72 h. The color turned dark brown with a white precipitate in suspension. The flask was cooled to room temperature and quenched with 10 mL of  $\text{H}_2\text{O}$ . The solution was extracted with DCM (3 x 10 mL) and the organic fractions were combined. The organic layer was dried over  $\text{MgSO}_4$  and concentrated under vacuum. The crude product purified by silica gel chromatography (100 % cyclohexane as eluent).

Standard analysis conditions: 40 °C (hold 1 min) to 250 °C (hold 6 min), heating rate: 7.5 °C/min.

GC-MS (LRMS):

$n\text{-C}_{12}\text{H}_{26}$ :  $t_{\text{R}} = 10.777$  min,  $m/z = 170.2$  (calcd. = 170.2).

$n\text{-C}_{12}\text{H}_{25}\text{I}$ :  $t_{\text{R}} = 19.074$  min,  $m/z = 296.2$  (calcd. = 296.1).

$\text{Ph}(n\text{-C}_{12}\text{H}_{25})$ :  $t_{\text{R}} = 22.415$  min,  $m/z = 246.2$  (calcd. = 246.2).

*Procedure and analytical data for cross-coupling between PhF and n-C<sub>12</sub>H<sub>25</sub>I:*

In an argon-filled glove box, a 50 mL J. Young flask equipped with a magnetic stir bar was loaded with Fe(Cl)<sub>2</sub>(dmpe)<sub>2</sub> (42.9 mg, 101.4 μmol, 0.1 equiv.), C<sub>6</sub>H<sub>5</sub>F (16.5 mL) and decane as an internal standard for GC-MS analysis. The mixture was placed under stirring and *n*-C<sub>12</sub>H<sub>25</sub>I (250.1 μL, 1014 μmol, 1 equiv.) was added dropwise followed by Li(hmnds) (169.7 mg, 1014 μmol, 1 equiv.). The color of the reaction medium gradually changed from emerald green to orange/brown. The reaction mixture was stirred for 5 min at room temperature then placed in an oil bath at 80°C and left for 72 h. The color turned dark brown with a white precipitate in suspension.. The flask was cooled to room temperature and quenched with 10 mL of H<sub>2</sub>O. The solution was extracted with DCM (3 x 10 mL) and the organic fractions were combined. The organic layer was dried over MgSO<sub>4</sub> and concentrated under vacuum. The crude product purified by silica gel chromatography (100 % cyclohexane as eluent); overall yield for the three *ortho* / *meta* / *para* isomers : 15% (11:5:1). <sup>19</sup>F NMR analytical data (Figure S24b) of the pure fraction containing the three coupling isomers was analyzed by GC-MS, and is in agreement with reported literature (comparison with *meta*-C<sub>6</sub>H<sub>4</sub>F(*n*-C<sub>6</sub>H<sub>13</sub>),[R5] *para*-C<sub>6</sub>H<sub>4</sub>F(*n*-C<sub>12</sub>H<sub>25</sub>),[R6] and *ortho*-C<sub>6</sub>H<sub>4</sub>F(*n*-C<sub>6</sub>H<sub>13</sub>),[R7]).

**b) General procedure for cross-coupling reactions with radical clock:  
Br(CH<sub>2</sub>)<sub>4</sub>CH=CH<sub>2</sub>**

All the cross-coupling reactions below were carried out using the following procedure. The reaction with Fe(Cl)<sub>2</sub>(dmpe)<sub>2</sub> (**1**) and Li(hmnds) without additives at 80 °C is given as an example (Entry 1) and was analyzed by GC-MS using pure compounds as internal standards.

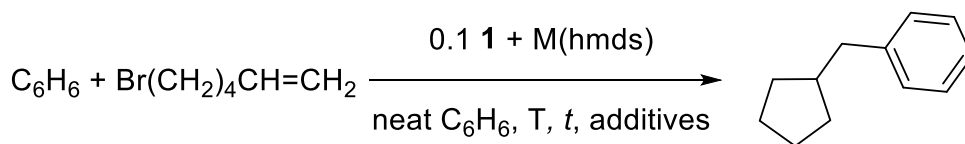

| Entry            | M  | T / °C | t / h | additives     | Yield (%) |
|------------------|----|--------|-------|---------------|-----------|
| 1                | Li | 80     | 24    | -             | 8         |
| 2                | Li | 80     | 24    | dmpe 1 equiv. | 3         |
| 3                | Li | 80     | 24    | dmpe 5 equiv. | 1         |
| 4 <sup>[a]</sup> | Li | 80     | 24    | dmpe 1 equiv. | 8         |

**Figure S39:** Cross-coupling between C<sub>6</sub>H<sub>6</sub> and Br(CH<sub>2</sub>)<sub>4</sub>CH=CH<sub>2</sub> mediated by **1** in the presence of Li(hmnds); other iron sources: [a] = 0.1 equiv. FeCl<sub>2</sub>.

In an argon-filled glove box, a 12 mL vial equipped with a magnetic stir bar was loaded with  $\text{Fe}(\text{Cl})_2(\text{dmpe})_2$  (3.1 mg, 7.3  $\mu\text{mol}$ , 0.1 equiv.),  $\text{C}_6\text{H}_6$  (1.5 mL) and decane as an internal standard for GC-MS analysis. The mixture was placed under stirring and  $\text{Br}(\text{CH}_2)_4\text{CH}=\text{CH}_2$  (9.7  $\mu\text{L}$ , 72.6  $\mu\text{mol}$ , 1 equiv.) was added dropwise followed by  $\text{Li}(\text{hmds})$  (12.2 mg, 72.6  $\mu\text{mol}$ , 1 equiv.). The color of the reaction medium gradually changed from emerald green to brown. The reaction mixture was stirred for 5 min and transferred into an NMR tube fitted with a J.Young valve. The tube was placed in an oil bath at 80°C and left for 24 h. The color turned dark orange. The tube was cooled to room temperature and quenched with 2 mL of  $\text{H}_2\text{O}$ . The solution was extracted with 2 mL of MTBE and analyzed by GC-MS.

Standard analysis conditions: 40 °C (hold 1 min) to 250 °C (hold 6 min), heating rate: 7.5 °C/min.

GC-MS (LRMS):

$\text{Br}(\text{CH}_2)_4\text{CH}=\text{CH}_2$ :  $t_{\text{R}} = 5.168$  min,  $m/z = 162.0$  (calcd. = 162.0).

$\text{C}_{12}\text{H}_{16}$ :  $t_{\text{R}} = 12.810$  min,  $m/z = 160.1$  (calcd. = 160.1).

**c) General procedure for cross-coupling reactions with  $2_{\text{Ph}}$  and  $n\text{-C}_{12}\text{H}_{25}\text{I}$**

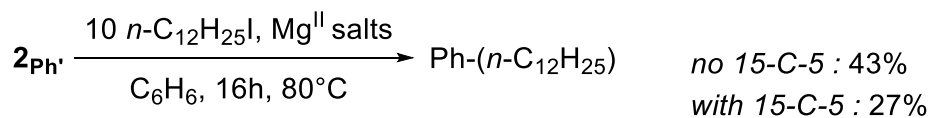

**Figure S40:** Cross-coupling between  $2_{\text{Ph}}$  and  $n\text{-C}_{12}\text{H}_{25}\text{I}$  with or without 15-C-5; yields based on GC-MS analysis.

$\text{FeBr}(\text{C}_6\text{H}_5)(\text{dmpe})_2$  was synthesized using the procedure previously described with  $\text{Fe}(\text{Cl})_2(\text{dmpe})_2$  (12 mg, 28.1  $\mu\text{mol}$ , 1 equiv.),  $\text{C}_6\text{H}_6$  (1.4 mL) and  $\text{PhMgBr}$  (14.1  $\mu\text{L}$ , 14.05  $\mu\text{mol}$ , 0.5 equiv.) in a 12 mL vial equipped with a magnetic stir bar. After one night at room temperature in the glove box, the solution was separated into two NMR tubes fitted with a J. Young valve. In the first tube (T1),  $n\text{-C}_{12}\text{H}_{25}\text{I}$  (34.7  $\mu\text{L}$ , 140.5  $\mu\text{mol}$ , 5 equiv.) was added dropwise and then the tube was vigorously shaken. The solution turned pink. In the second tube (T2),  $n\text{-C}_{12}\text{H}_{25}\text{I}$  (34.7  $\mu\text{L}$ , 140.5  $\mu\text{mol}$ , 5 equiv.) was also added dropwise followed by 15-C-5 (2.8  $\mu\text{L}$ , 14.05  $\mu\text{mol}$ , 0.5 equiv.) then vigorously shaken. The solution remained yellow/orange. Both tubes were placed in an oil bath at 80°C and left for 16 h. The tube (T1) turned pale green and the tube (T2) turned

green/yellow. Tubes were cooled to room temperature and quenched with 1 mL H<sub>2</sub>O. They were extracted with 1 mL of MTBE and analyzed by GC-MS.



## 5) C-H / B-H bond metathesis: reductive dehydrocoupling

### a) General procedure for borylation of C-H bonds

All the borylation reactions present in the main article, Table 4 were carried out using the following procedure. The reaction with  $\text{Fe}(\text{Cl})_2(\text{dmpe})_2$  (**1**) and  $\text{Li}(\text{hmds})$  is given as an example (Entry 4).

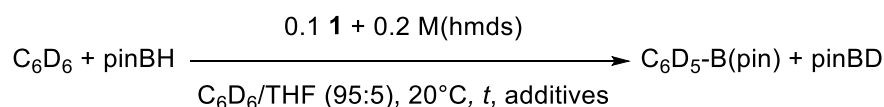

**Figure S41:** Borylation between  $\text{C}_6\text{D}_6$  and pinBH mediated by **1** in the presence of  $\text{M}(\text{hmds})$ ; composition of the crude mixture was determined by  $^{11}\text{B}$  NMR integration.

In an argon-filled glove box, a 12 mL vial equipped with a magnetic stir bar was loaded with  $\text{Fe}(\text{Cl})_2(\text{dmpe})_2$  (3.7 mg, 8.7  $\mu\text{mol}$ , 0.1 equiv.),  $\text{C}_6\text{D}_6$  (0.6 mL) and THF in a 9:1 ratio. The mixture was placed under stirring and  $\text{Li}(\text{hmds})$  (2.9 mg, 17.3  $\mu\text{mol}$ , 0.2 equiv.) was added. The color of the reaction medium gradually changed from emerald green to yellow/orange. The reaction mixture was stirred for 3 days at room temperature in order to afford the expected distribution of **3**, **3'** and **4<sub>C6D5,D</sub>** species. Pinacolborane (12.6  $\mu\text{L}$ , 87  $\mu\text{mol}$ , 1 equiv.) was added dropwise and the mixture was transferred into an NMR tube fitted with a J.Young valve. The tube was irradiated, and the reaction was followed by  $^{11}\text{B}$ ,  $^{31}\text{P}\{^1\text{H}\}$  and  $^1\text{H}$  NMR.

The  $^1\text{H}$  and  $^{11}\text{B}$  NMR data are in agreement with the literature[**R8**].

Ph-Bpin:  $^1\text{H}$  NMR (400 MHz,  $\text{CDCl}_3$ ):  $\delta = 7.79\text{-}7.76$  (m, 2H), 7.44-7.40 (m, 1H), 7.35-7.31 (m, 2H), 1.31 (s, 12H).  $^{11}\text{B}$  NMR (128 MHz,  $\text{CDCl}_3$ ):  $\delta = 31.02$  (br. s).

Standard GC-MS analysis conditions: 40  $^\circ\text{C}$  (hold 1 min) to 250  $^\circ\text{C}$  (hold 6 min), heating rate: 7.5  $^\circ\text{C}/\text{min}$ .

GC-MS (LRMS):

Ph-Bpin:  $t_{\text{R}} = 13.945$  min,  $m/z = 204.1$  (calcd. = 204.1).

### b) $^{11}\text{B}$ , $^{31}\text{P}\{^1\text{H}\}$ and $^1\text{H}$ NMR data for borylation experiments

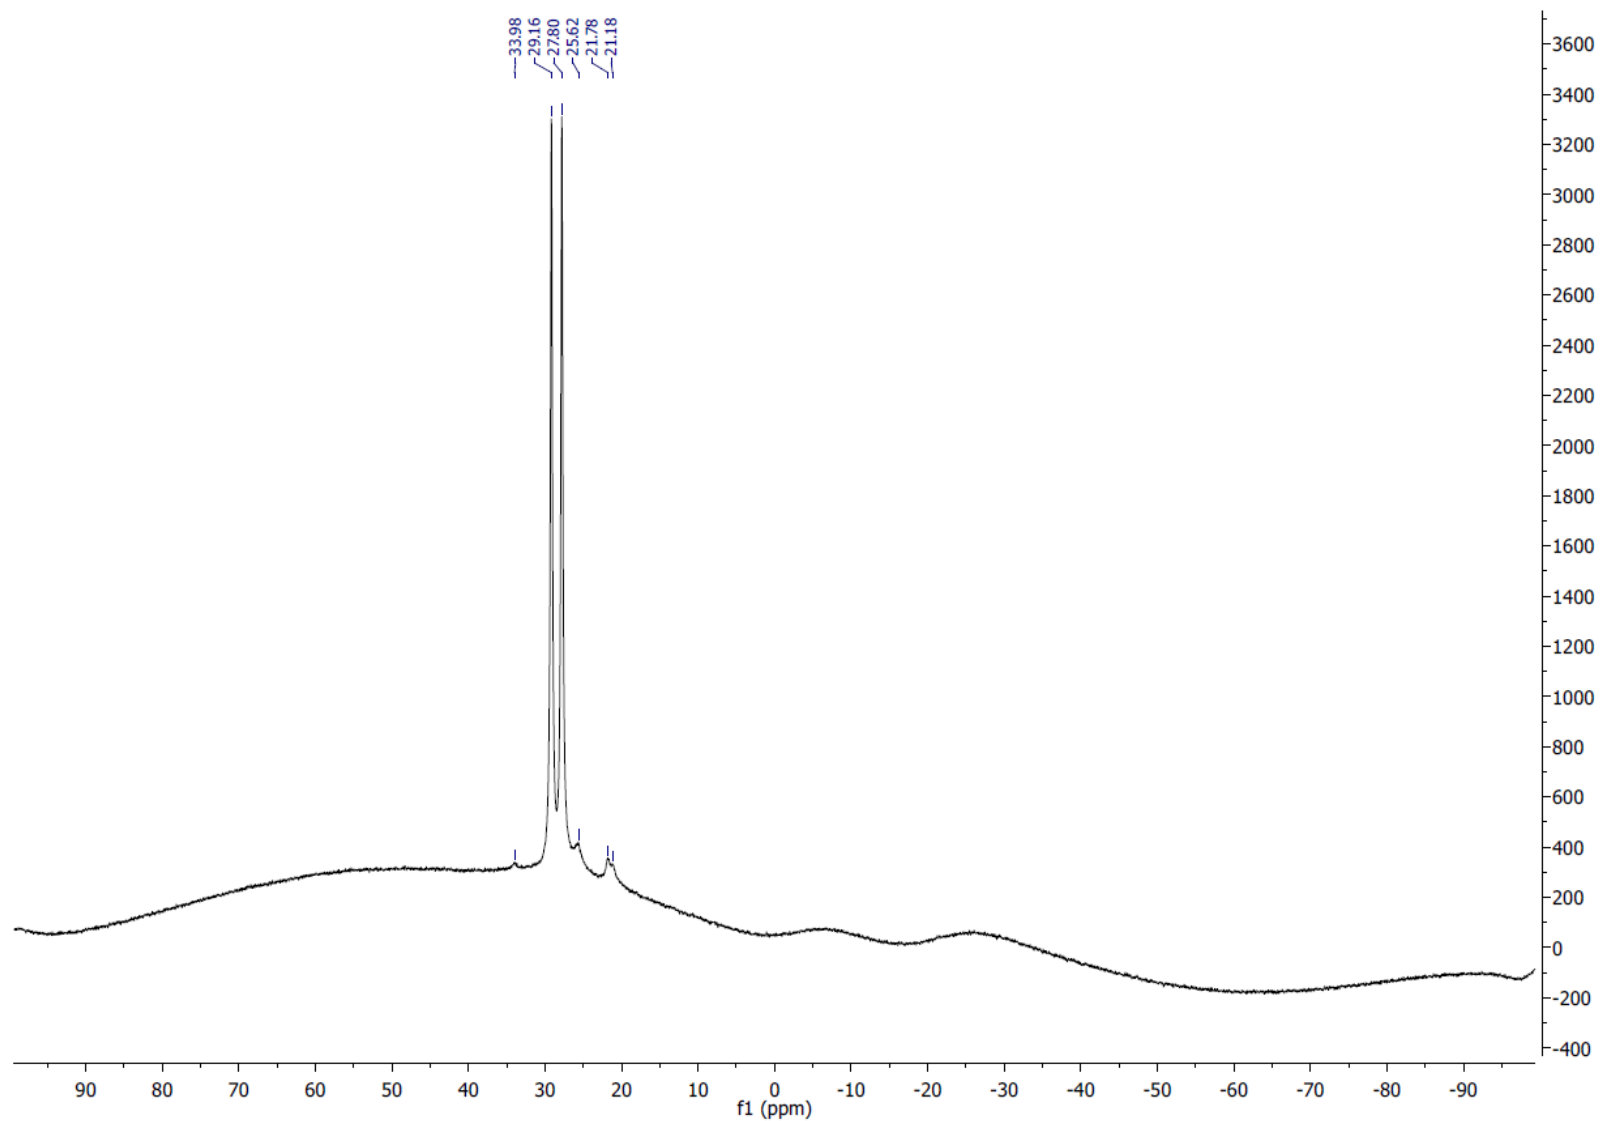

**Figure S42:**  $^{11}\text{B}$  NMR (128 MHz, 298 K,  $\text{C}_6\text{D}_6/\text{THF}$  9:1) of  $\text{Fe}(\text{Cl})_2(\text{dmpe})_2$  (**1**) (8.2  $\mu\text{mol}$ ) treated by 2 equiv. of  $\text{Na}(\text{hmds})$  (premix 3 days) and 10 equiv. of pinBH after 7 days in the dark.

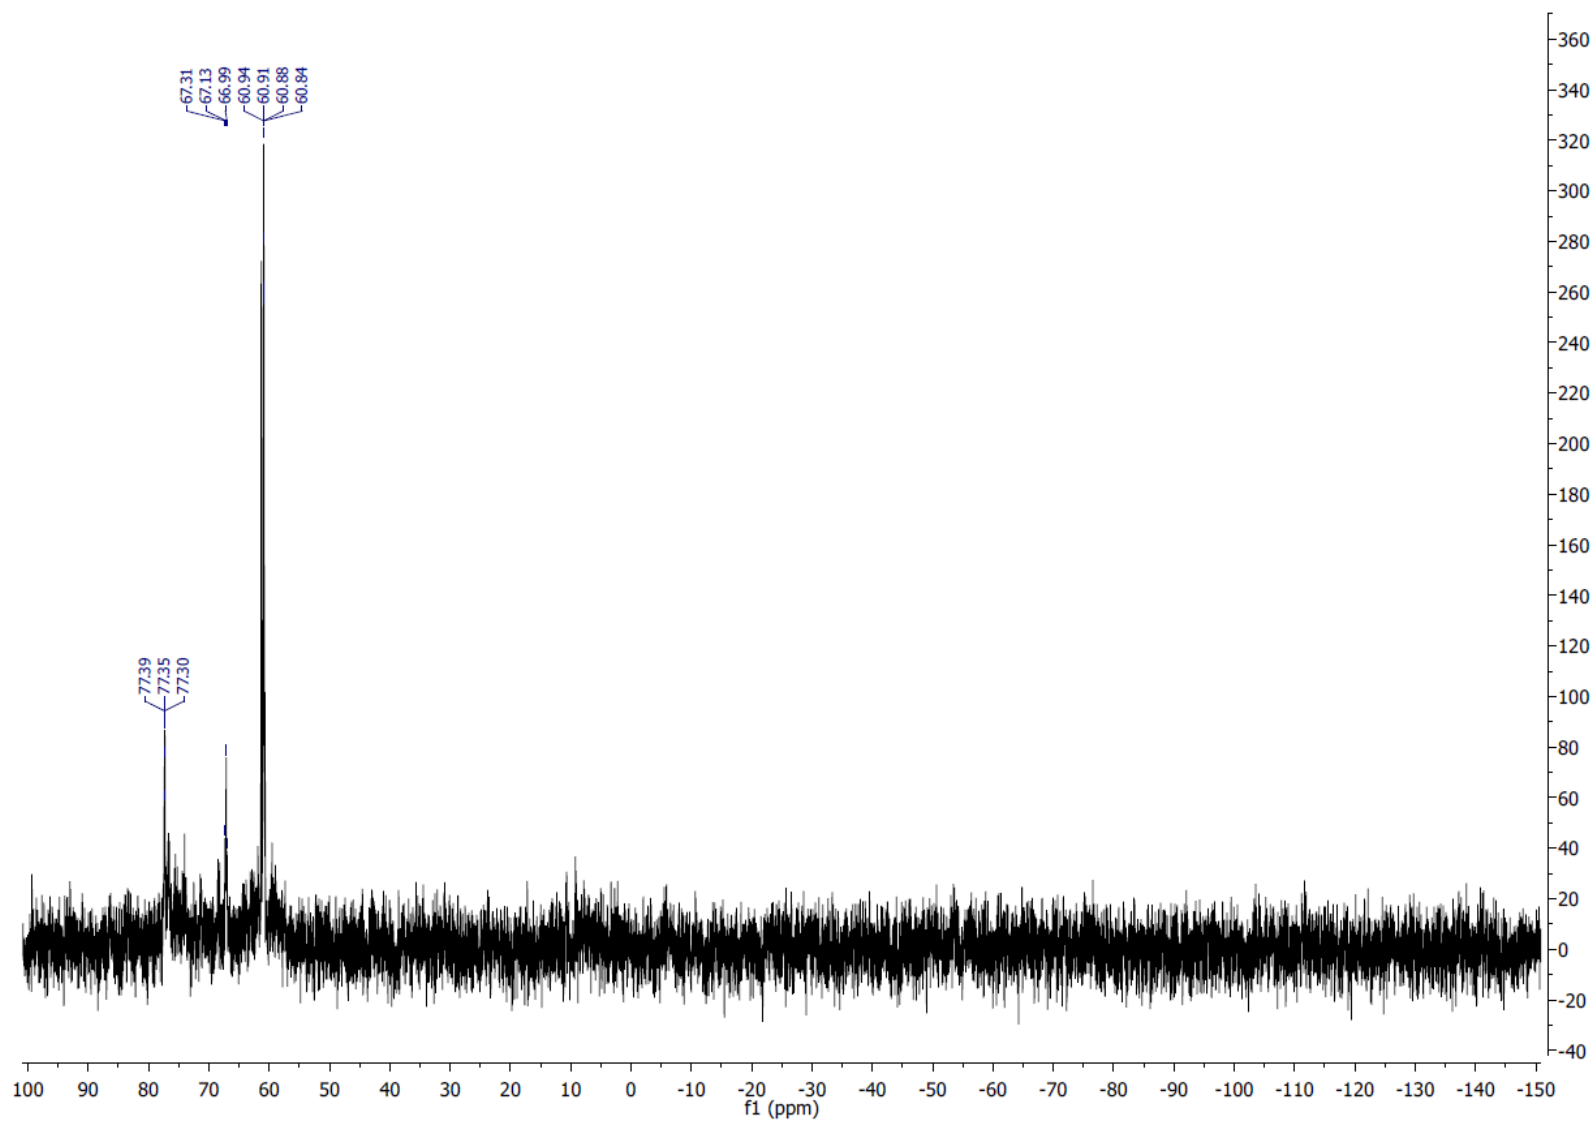

**Figure S43:**  $^{31}\text{P}\{^1\text{H}\}$  NMR (162 MHz, 298 K,  $\text{C}_6\text{D}_6/\text{THF}$  9:1) of  $\text{Fe}(\text{Cl})_2(\text{dmpe})_2$  (**1**) (8.2  $\mu\text{mol}$ ) treated by 2 equiv. of  $\text{Na}(\text{hmds})$  (premix 3 days) and 10 equiv. of pinBH after 7 days in the dark. It shows the presence of (**3'**), (**3''**),  $\text{Fe}(\text{H})_2(\text{dmpe})_2$  and  $\text{Fe}(\text{H})(\text{D})(\text{dmpe})_2$ .

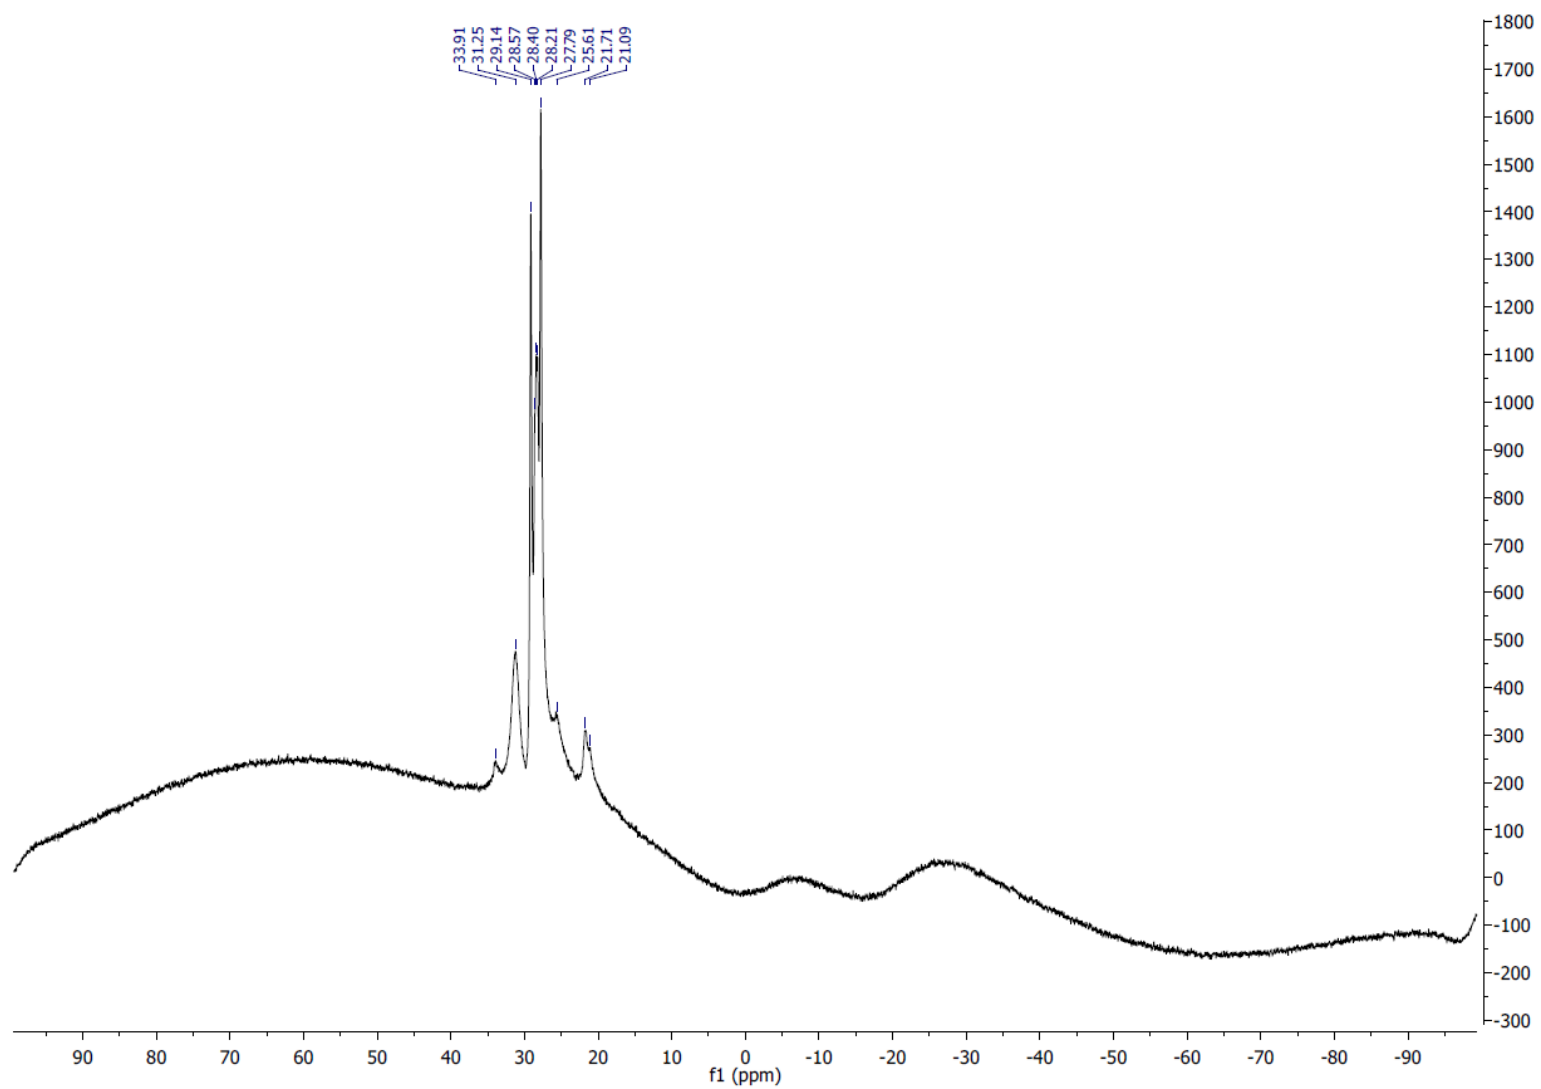

**Figure S44:**  $^{11}\text{B}$  NMR (128 MHz, 298 K,  $\text{C}_6\text{D}_6/\text{THF}$  9:1) of  $\text{Fe}(\text{Cl})_2(\text{dmpe})_2$  (**1**) (8.2  $\mu\text{mol}$ ) treated by 2 equiv. of  $\text{Na}(\text{hmds})$  (premix 3 days) and 10 equiv. of pinBH after 7 days upon photolysis (350 nm). It shows the presence of Ph-Bpin (s, 31.25 ppm) and pinBD (t, 28.4 ppm).

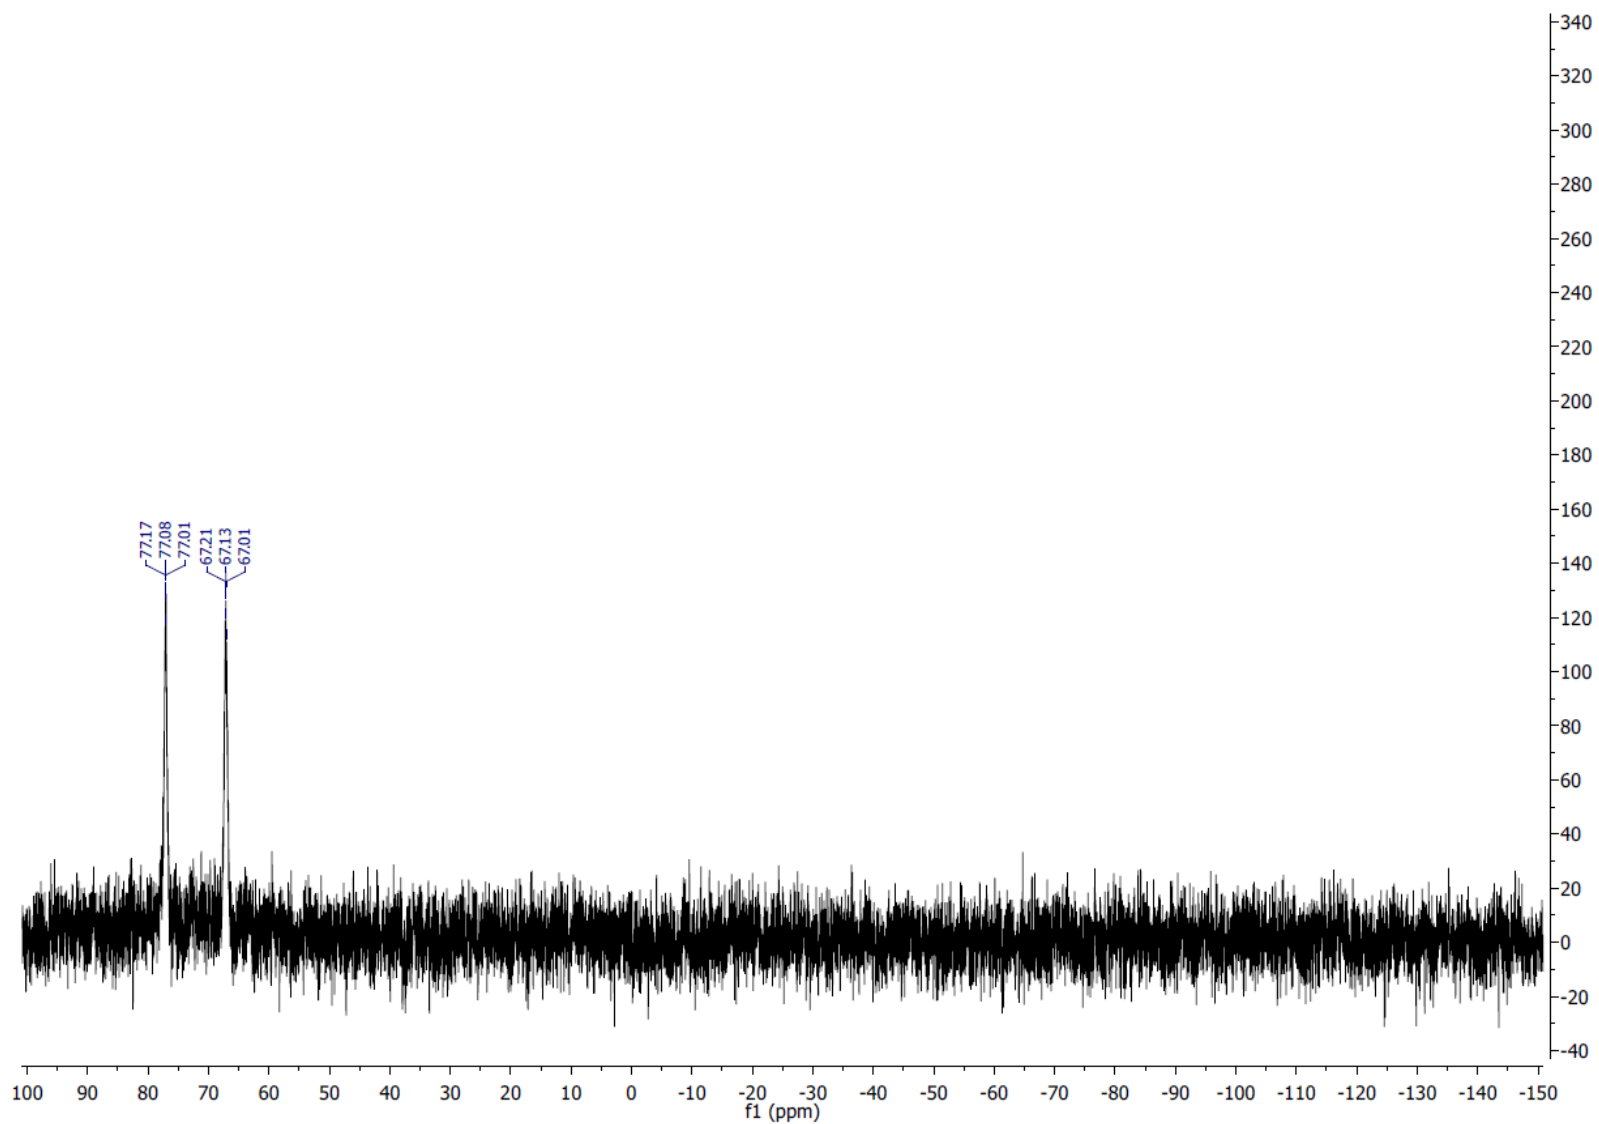

**Figure S45:**  $^{31}\text{P}\{^1\text{H}\}$  NMR (162 MHz, 298 K,  $\text{C}_6\text{D}_6/\text{THF}$  9:1) of  $\text{Fe}(\text{Cl})_2(\text{dmpe})_2$  (**1**) (8.2  $\mu\text{mol}$ ) treated by 2 equiv. of  $\text{Na}(\text{hmde})$  (premix 3 days) and 10 equiv. of pinBH after 7 days upon photolysis (350 nm). It shows only the presence of  $\text{Fe}(\text{H})_2(\text{dmpe})_2$  and  $\text{Fe}(\text{H})(\text{D})(\text{dmpe})_2$ .

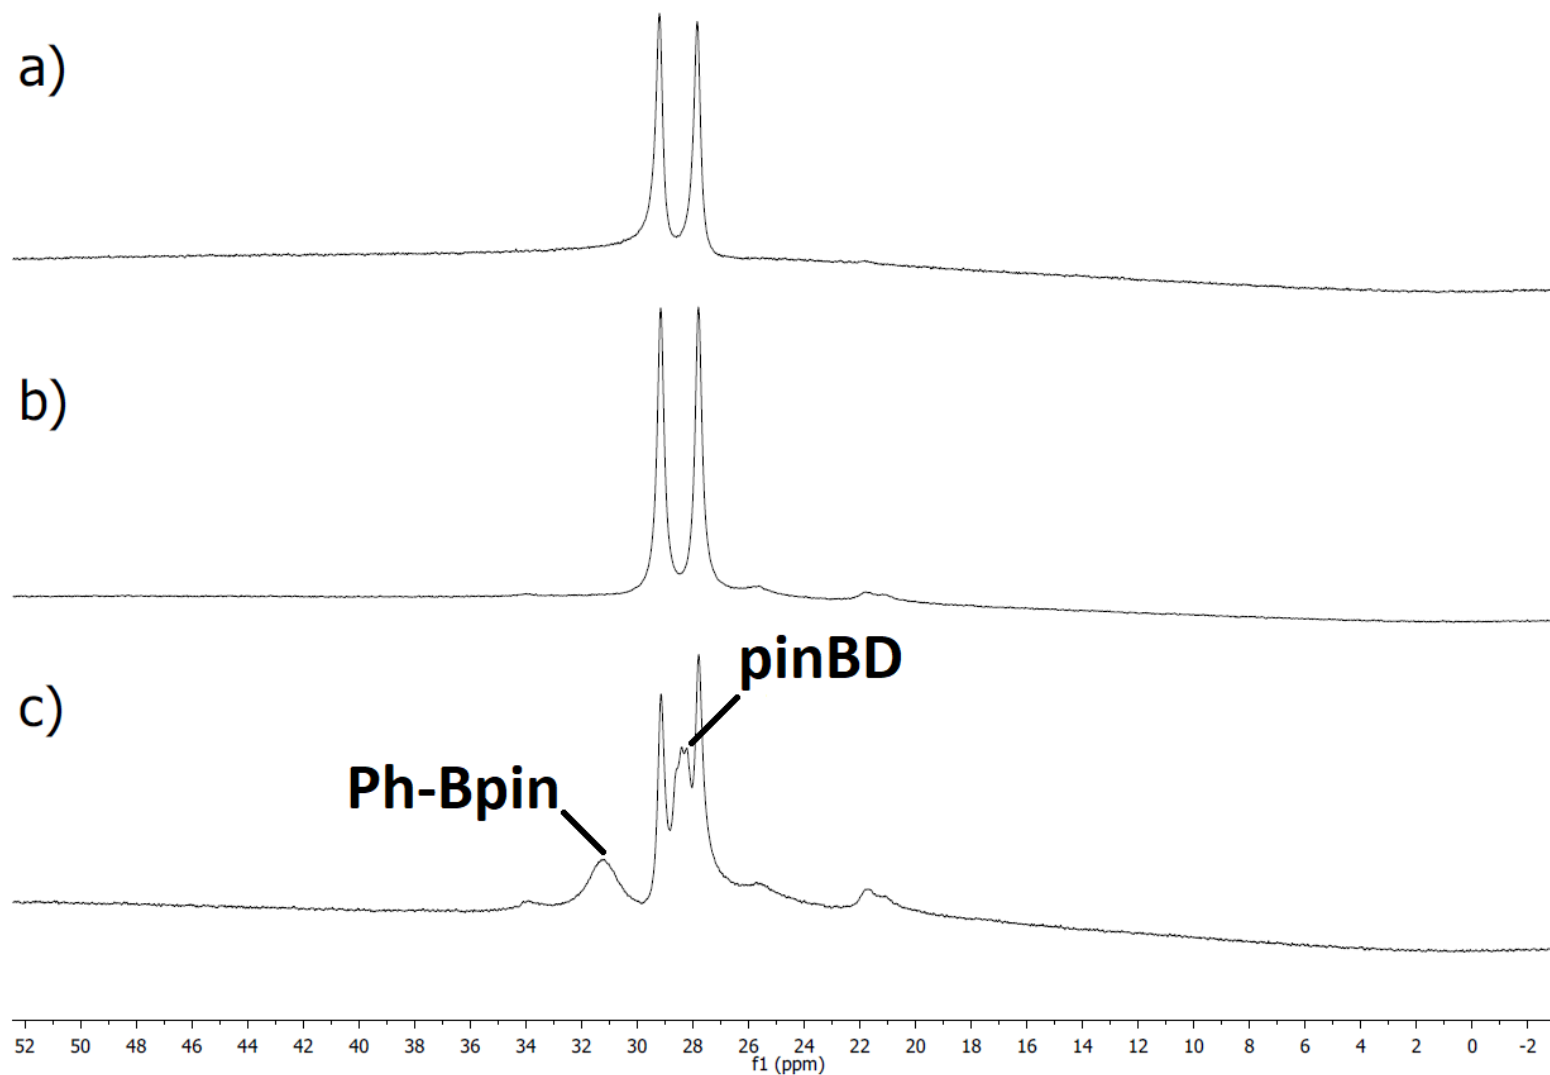

**Figure S46:**  $^{11}\text{B}$  NMR (128 MHz, 298 K,  $\text{C}_6\text{D}_6/\text{THF}$  9:1) of pinBH (a), **1** (8.2  $\mu\text{mol}$ ) treated by 2 equiv. of Na(hmds) (premix 3 days) and 10 equiv. of pinBH after 7 days in the dark (b) and (**1**) (8.2  $\mu\text{mol}$ ) treated by 2 equiv. of Na(hmds) (premix 3 days) and 10 equiv. of pinBH after 7 days upon photolysis (350 nm) (c).

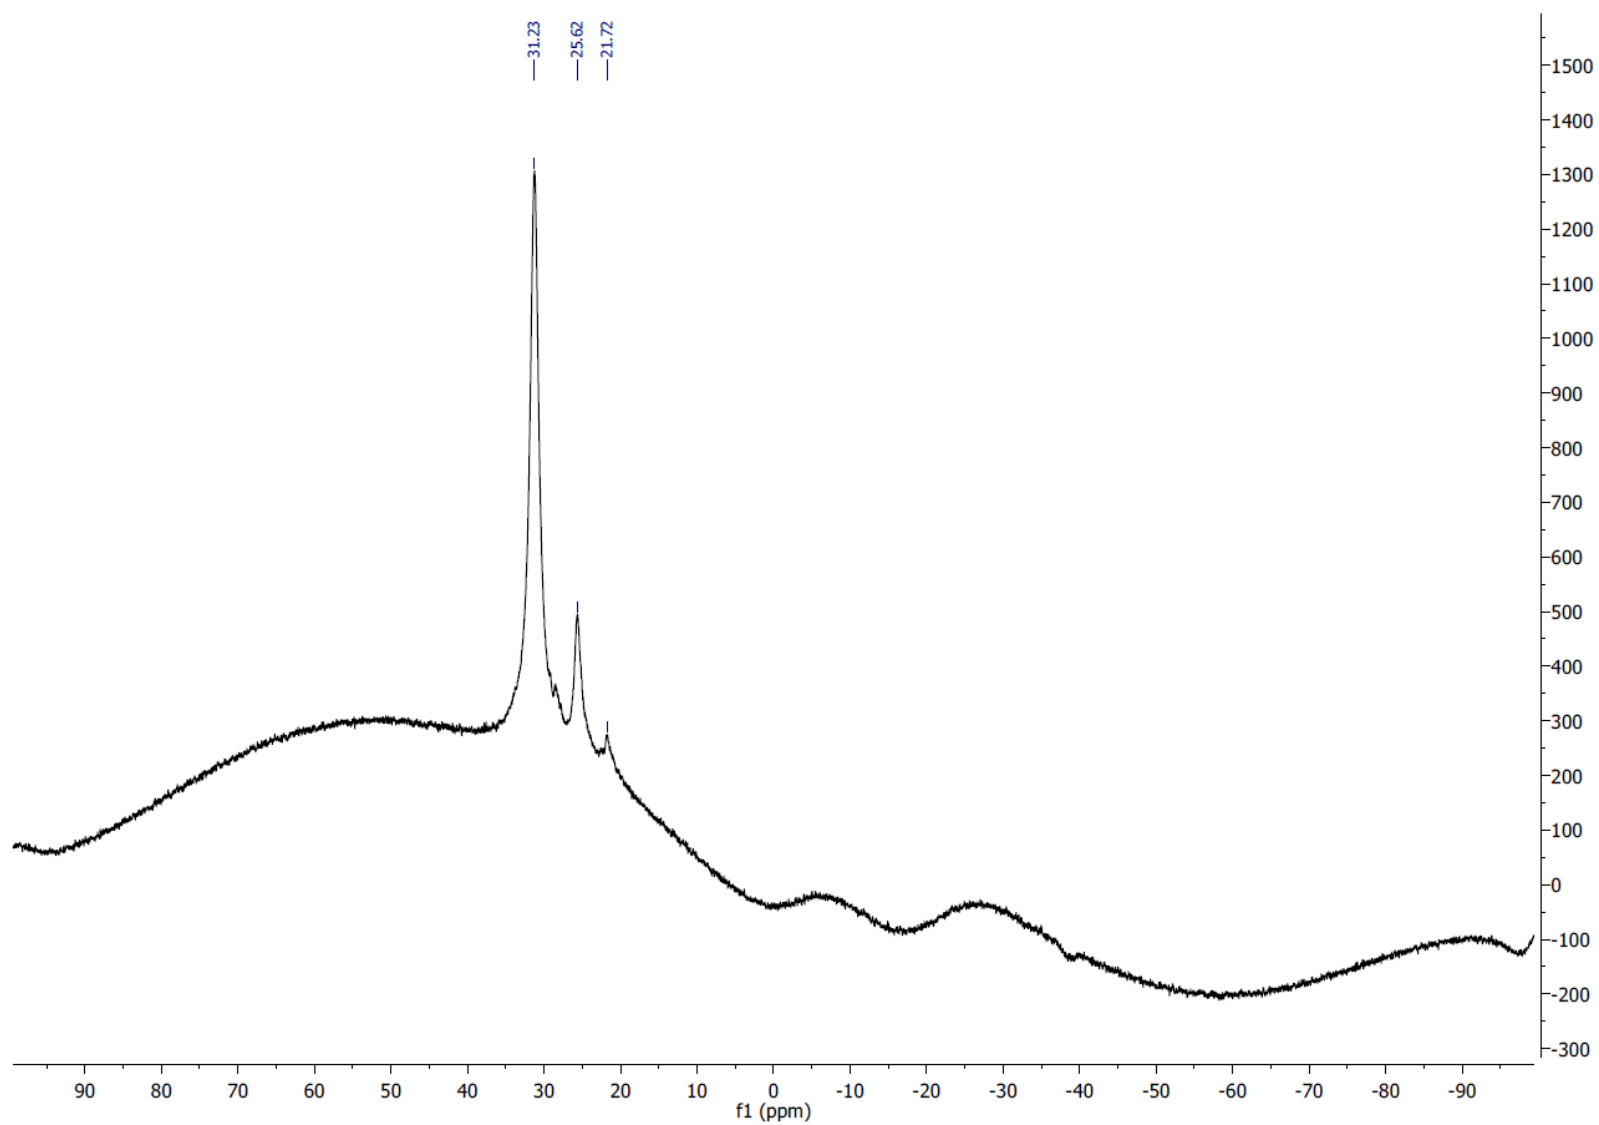

**Figure S47:**  $^{11}\text{B}$  NMR (128 MHz, 298 K,  $\text{C}_6\text{D}_6/\text{THF}$  9:1) of  $\text{Fe}(\text{Cl})_2(\text{dmpe})_2$  (**1**) (8.7  $\mu\text{mol}$ ) treated by 2 equiv. of  $\text{Li}(\text{hmds})$  (premix 3 days) and 10 equiv. of pinBH after 6 days upon photolysis (350 nm). It shows the presence of Ph-Bpin (s, 31.23 ppm).

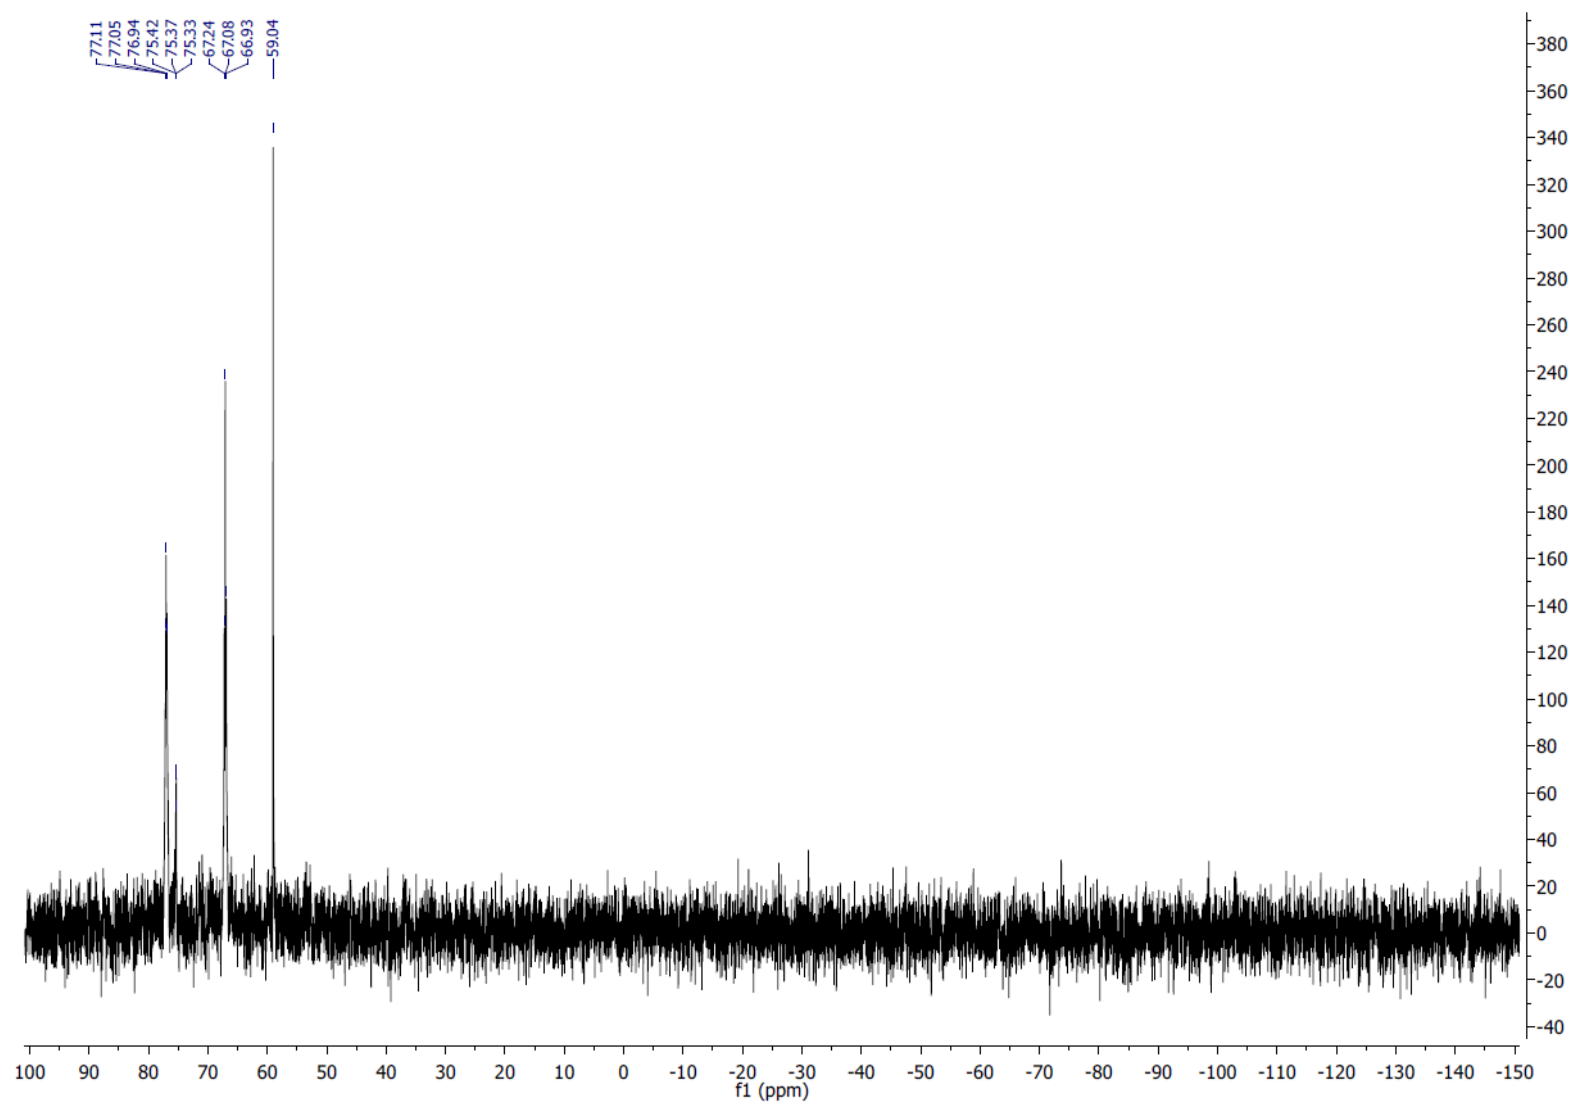

**Figure S48:**  $^{31}\text{P}\{^1\text{H}\}$  NMR (162 MHz, 298 K,  $\text{C}_6\text{D}_6$ ) of  $\text{Fe}(\text{Cl})_2(\text{dmpe})_2$  (**1**) (8.7  $\mu\text{mol}$ ) treated by 2 equiv. of  $\text{Li}(\text{hmds})$  (premix 3 days) and 10 equiv. of pinBH after 10 days upon photolysis (350 nm). It shows the presence of (**4C6D5,D**), starting  $\text{FeCl}_2(\text{dmpe})_2$ ,  $\text{Fe}(\text{H})_2(\text{dmpe})_2$  and  $\text{Fe}(\text{H})(\text{D})(\text{dmpe})_2$ , and unreacted **1**.



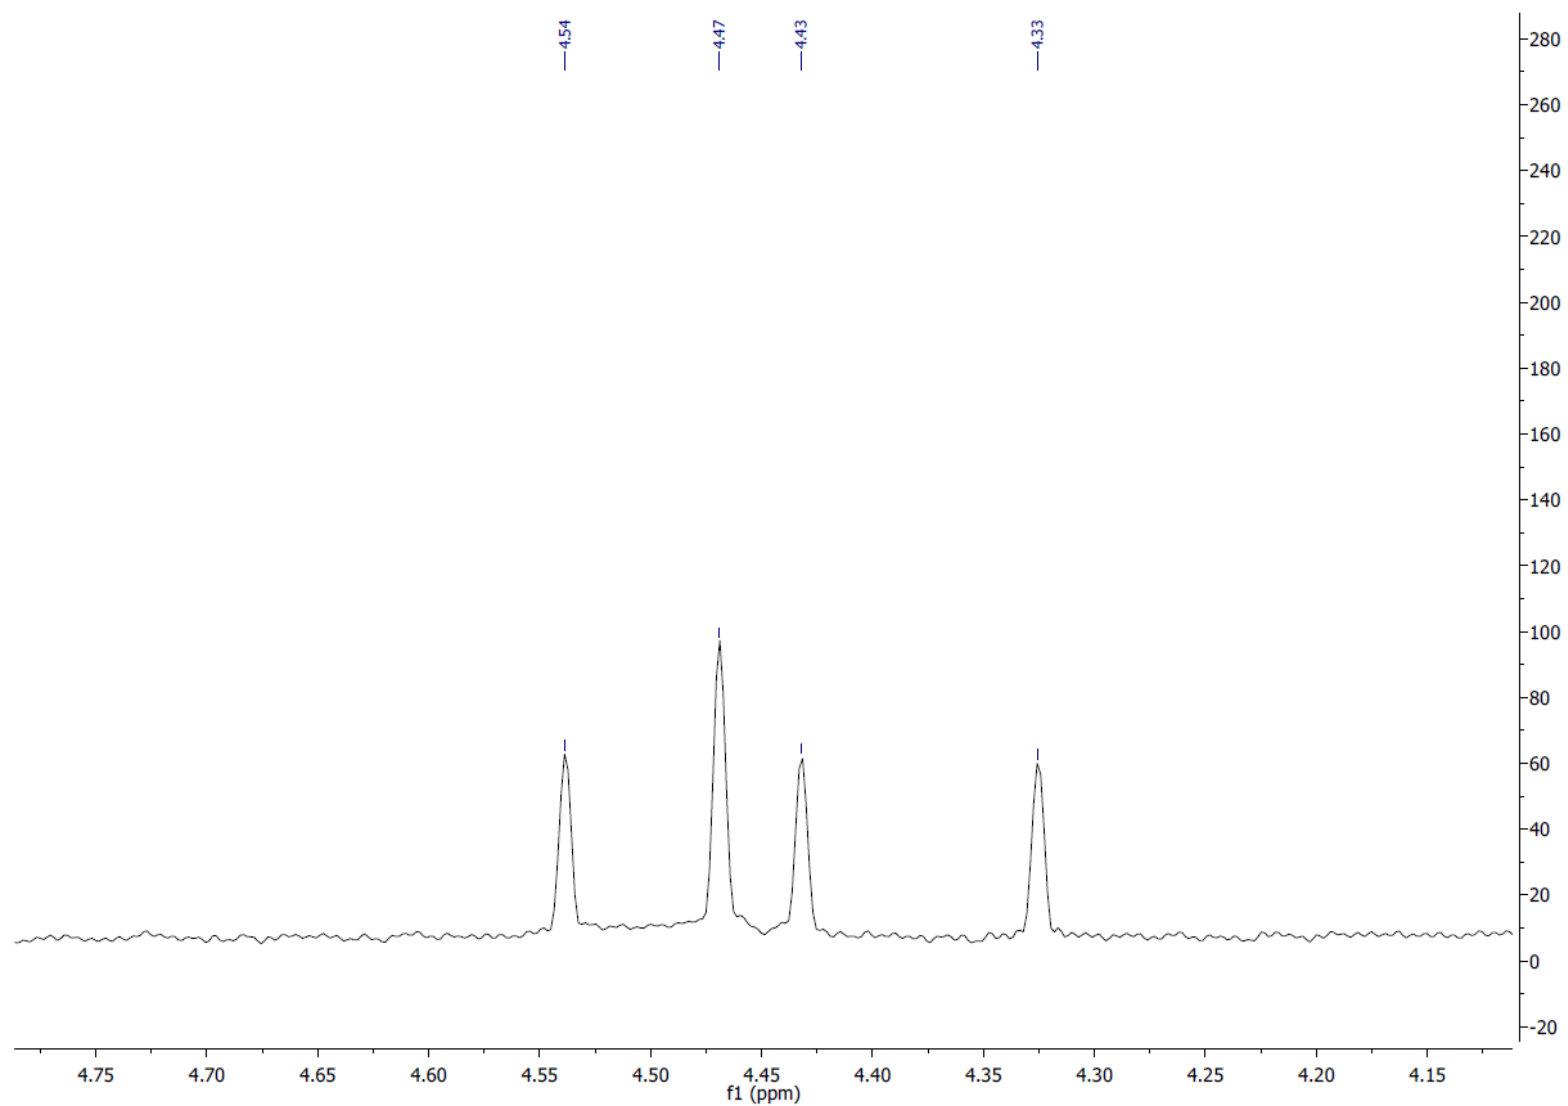

**Figure S49:**  $^1\text{H}$  NMR (400 MHz, 298 K,  $\text{C}_6\text{D}_6$ ) of  $\text{Fe}(\text{Cl})_2(\text{dmpe})_2$  (**1**) (8.7  $\mu\text{mol}$ ) treated by 2 equiv. of  $\text{Li}(\text{hmds})$  (premix 3 days) and 10 equiv. of  $\text{pinBH}$  after 10 days upon photolysis (350 nm). It shows the presence of  $\text{H}_2$  (s, 4.47 ppm) and HD (t, 4.54-4.33,  $J(^1\text{H}-^2\text{D}) = 42.7$  Hz).

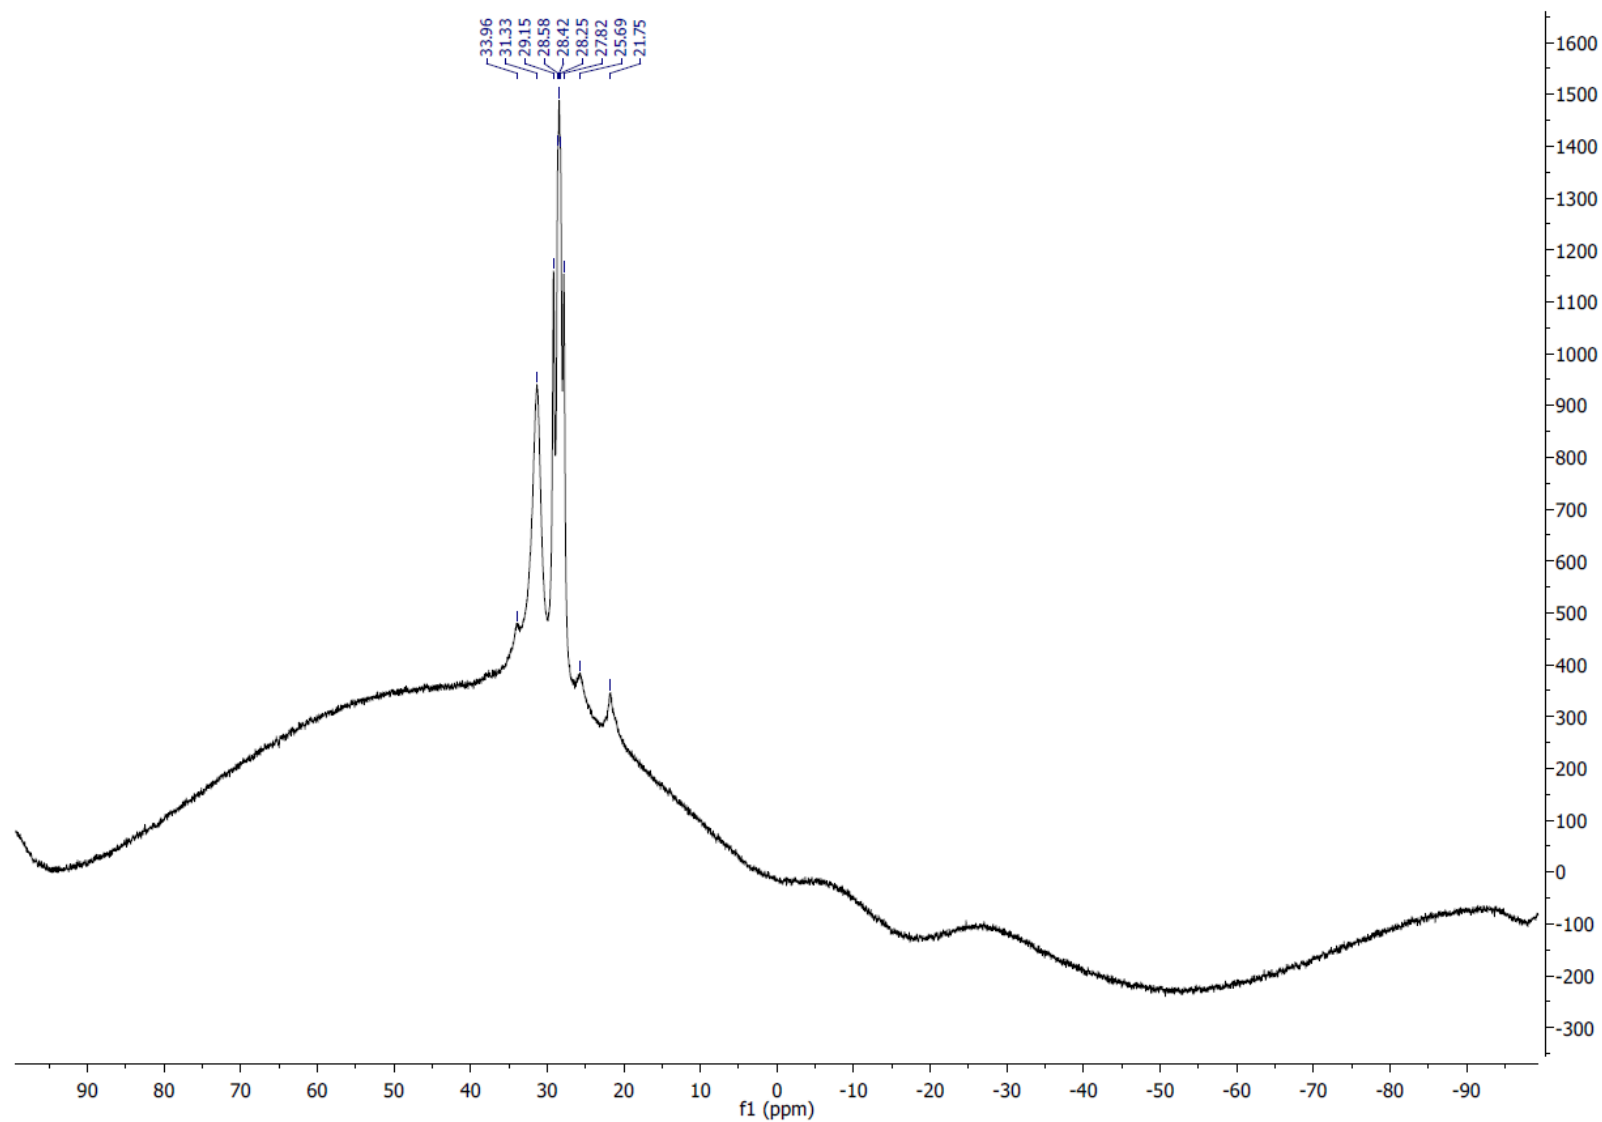

**Figure S50:**  $^{11}\text{B}$  NMR (128 MHz, 298 K,  $\text{C}_6\text{D}_6/\text{THF}$  9:1) of  $\text{Fe}(\text{Cl})_2(\text{dmpe})_2$  (**1**) (8.7  $\mu\text{mol}$ ) treated by 2 equiv. of  $\text{Na}(\text{hmds})$  (premix 3 days) and 10 equiv. of pinBH after 10 days upon photolysis (350 nm). It shows the presence of Ph-Bpin, pinBD and starting pinBH.

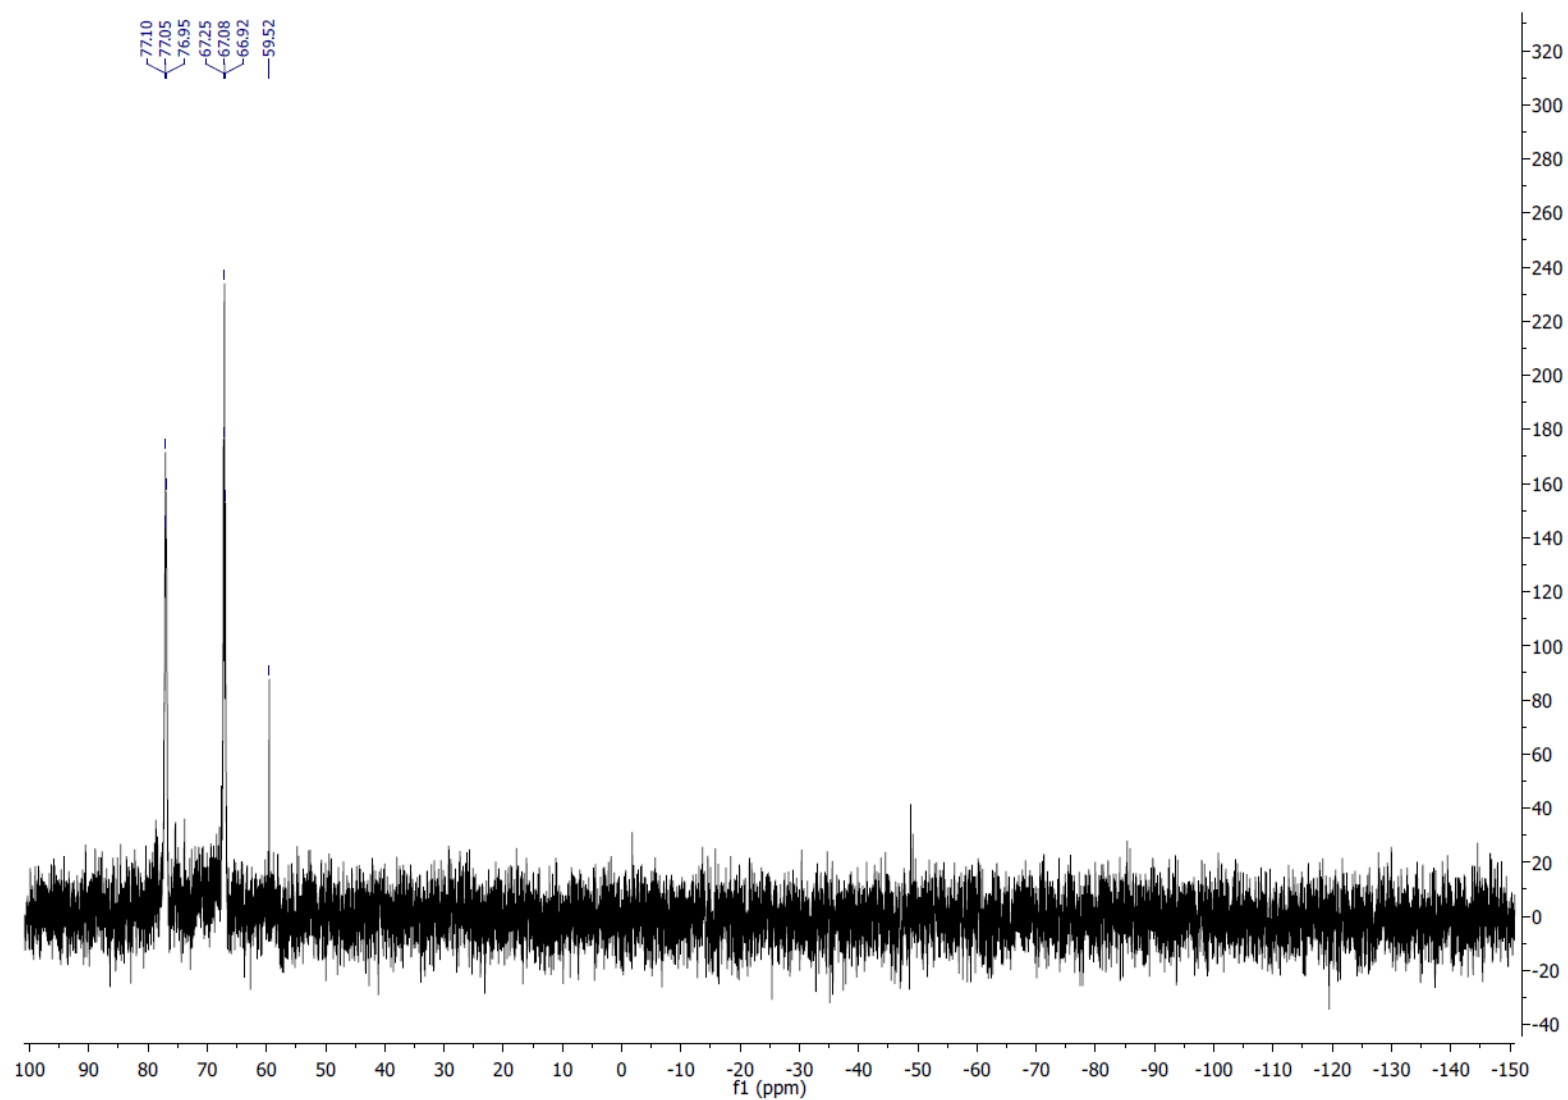

**Figure S51:**  $^{31}\text{P}\{^1\text{H}\}$  NMR (162 MHz, 298 K,  $\text{C}_6\text{D}_6/\text{THF}$  9:1) of  $\text{Fe}(\text{Cl})_2(\text{dmpe})_2$  (**1**) (8.7  $\mu\text{mol}$ ) treated by 2 equiv. of  $\text{Na}(\text{hmds})$  (premix 3 days) and 10 equiv. of  $\text{pinBH}$  after 10 days upon photolysis (350 nm). It shows the presence of  $\text{Fe}(\text{H})_2(\text{dmpe})_2$  and  $\text{Fe}(\text{H})(\text{D})(\text{dmpe})_2$ , and unreacted **1**.

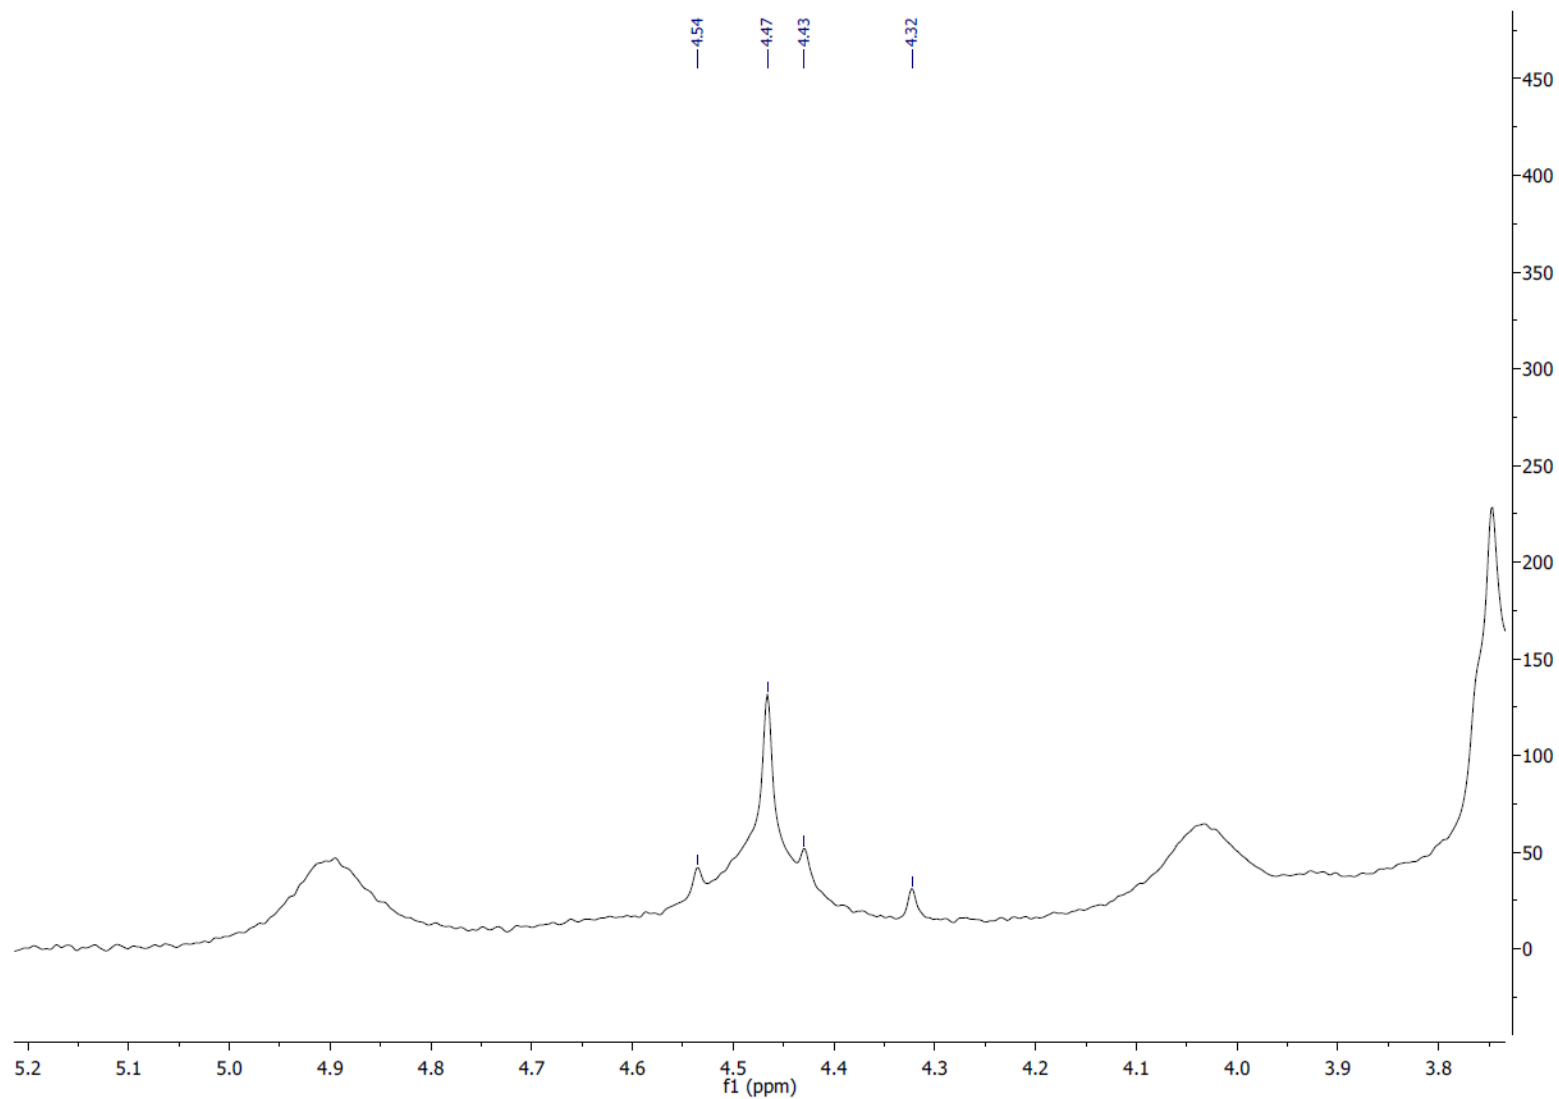

**Figure S52:** <sup>1</sup>H NMR (400 MHz, 298 K, C<sub>6</sub>D<sub>6</sub>/THF 9:1) of Fe(Cl)<sub>2</sub>(dmpe)<sub>2</sub> (**1**) (8.7 μmol) treated by 2 equiv. of Na(hmds) (premix 3 days) and 10 equiv. of pinBH after 10 days upon photolysis (350 nm). It shows the presence of H<sub>2</sub> (s, 4.47 ppm), HD (t, 4.54-4.33,  $J(^1\text{H}-^2\text{D}) = 42.7$  Hz) and starting pinBH.

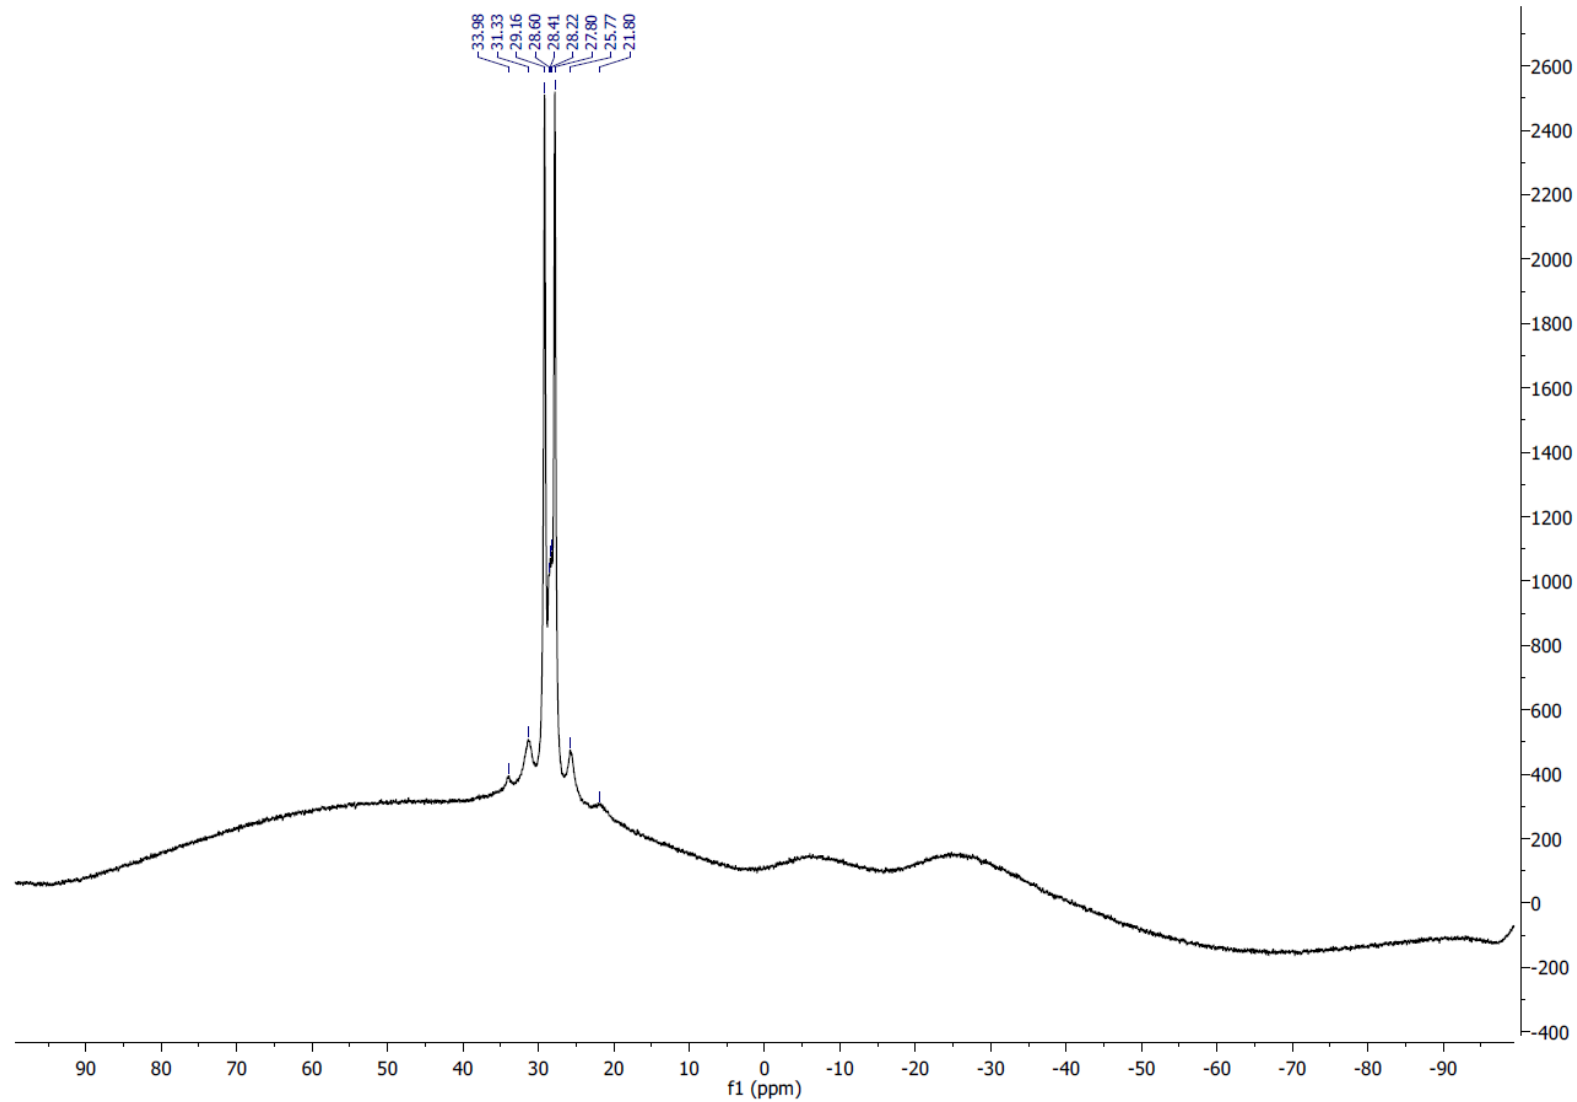

**Figure S53:**  $^{11}\text{B}$  NMR (128 MHz, 298 K,  $\text{C}_6\text{D}_6/\text{THF}$  9:1) of  $\text{Fe}(\text{Cl})_2(\text{dmpe})_2$  (**1**) (9.6  $\mu\text{mol}$ ) treated by 2 equiv. of  $\text{K}(\text{hmds})$  (premix 3 days) and 10 equiv. of pinBH after 10 days upon photolysis (350 nm). It shows the presence of Ph-Bpin, pinBD and starting pinBH.

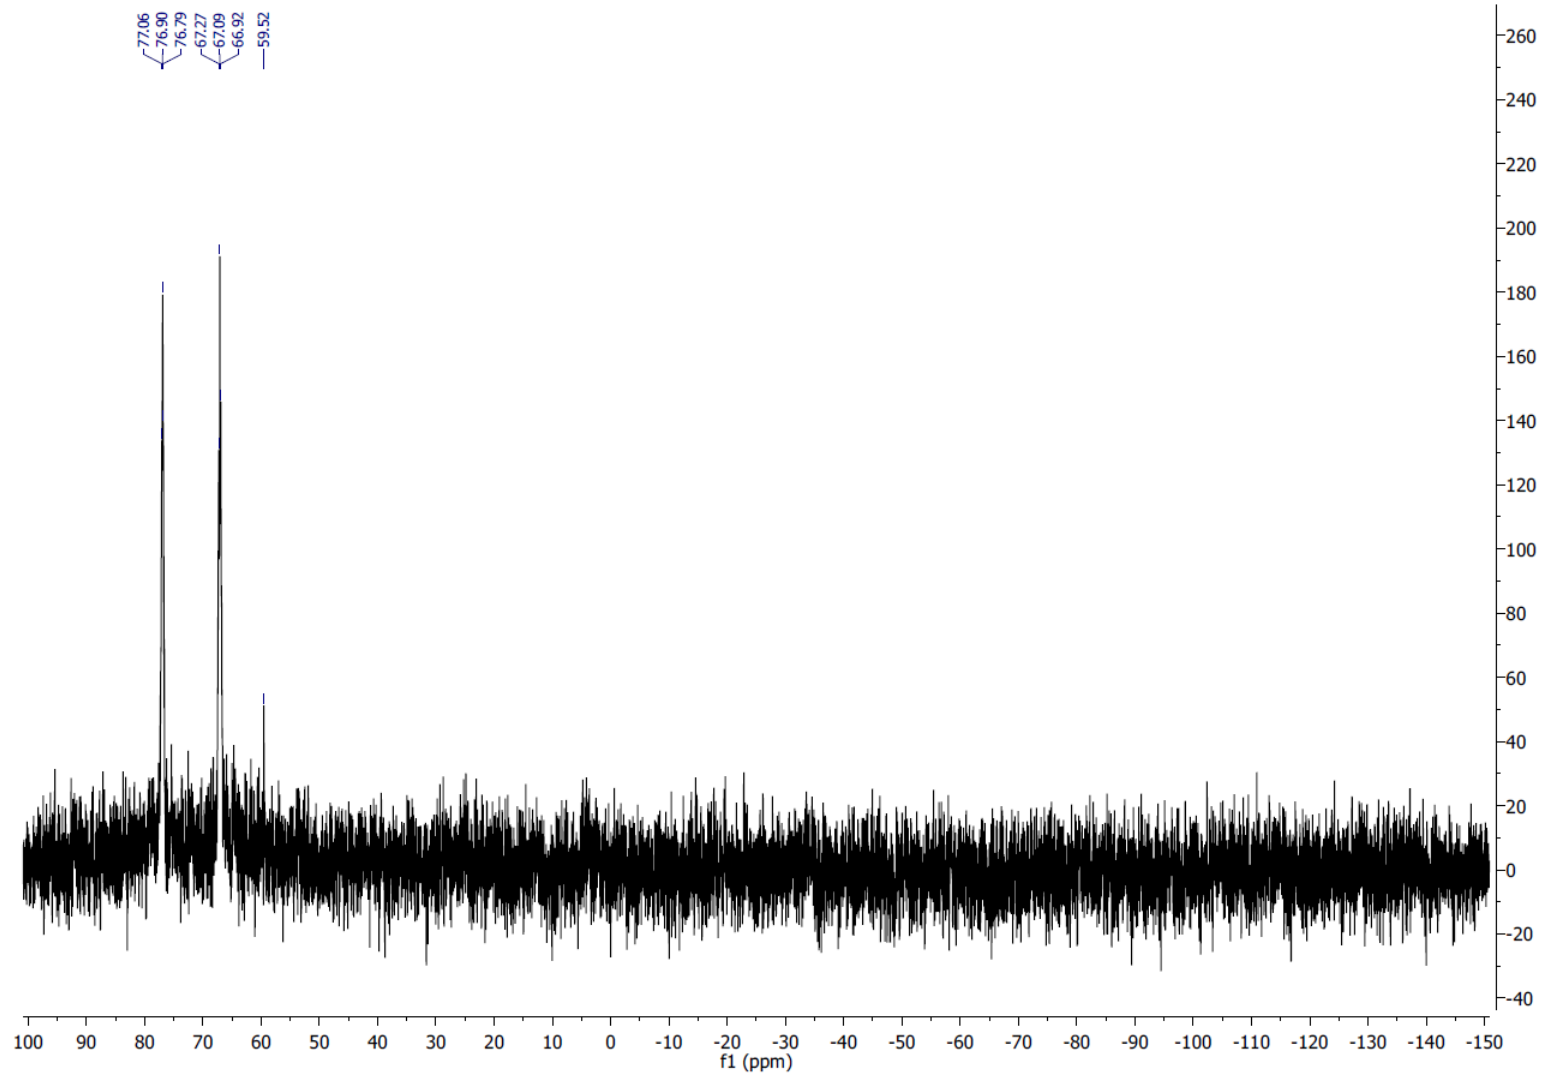

**Figure S54:**  $^{31}\text{P}\{^1\text{H}\}$  NMR (162 MHz, 298 K,  $\text{C}_6\text{D}_6/\text{THF}$  9:1) of  $\text{Fe}(\text{Cl})_2(\text{dmpe})_2$  (**1**) (9.6  $\mu\text{mol}$ ) treated by 2 equiv. of  $\text{K}(\text{hmds})$  (premix 3 days) and 10 equiv. of pinBH after 10 days upon photolysis (350 nm). It shows the presence of  $\text{Fe}(\text{H})_2(\text{dmpe})_2$  and  $\text{Fe}(\text{H})(\text{D})(\text{dmpe})_2$ , and unreacted **1**.

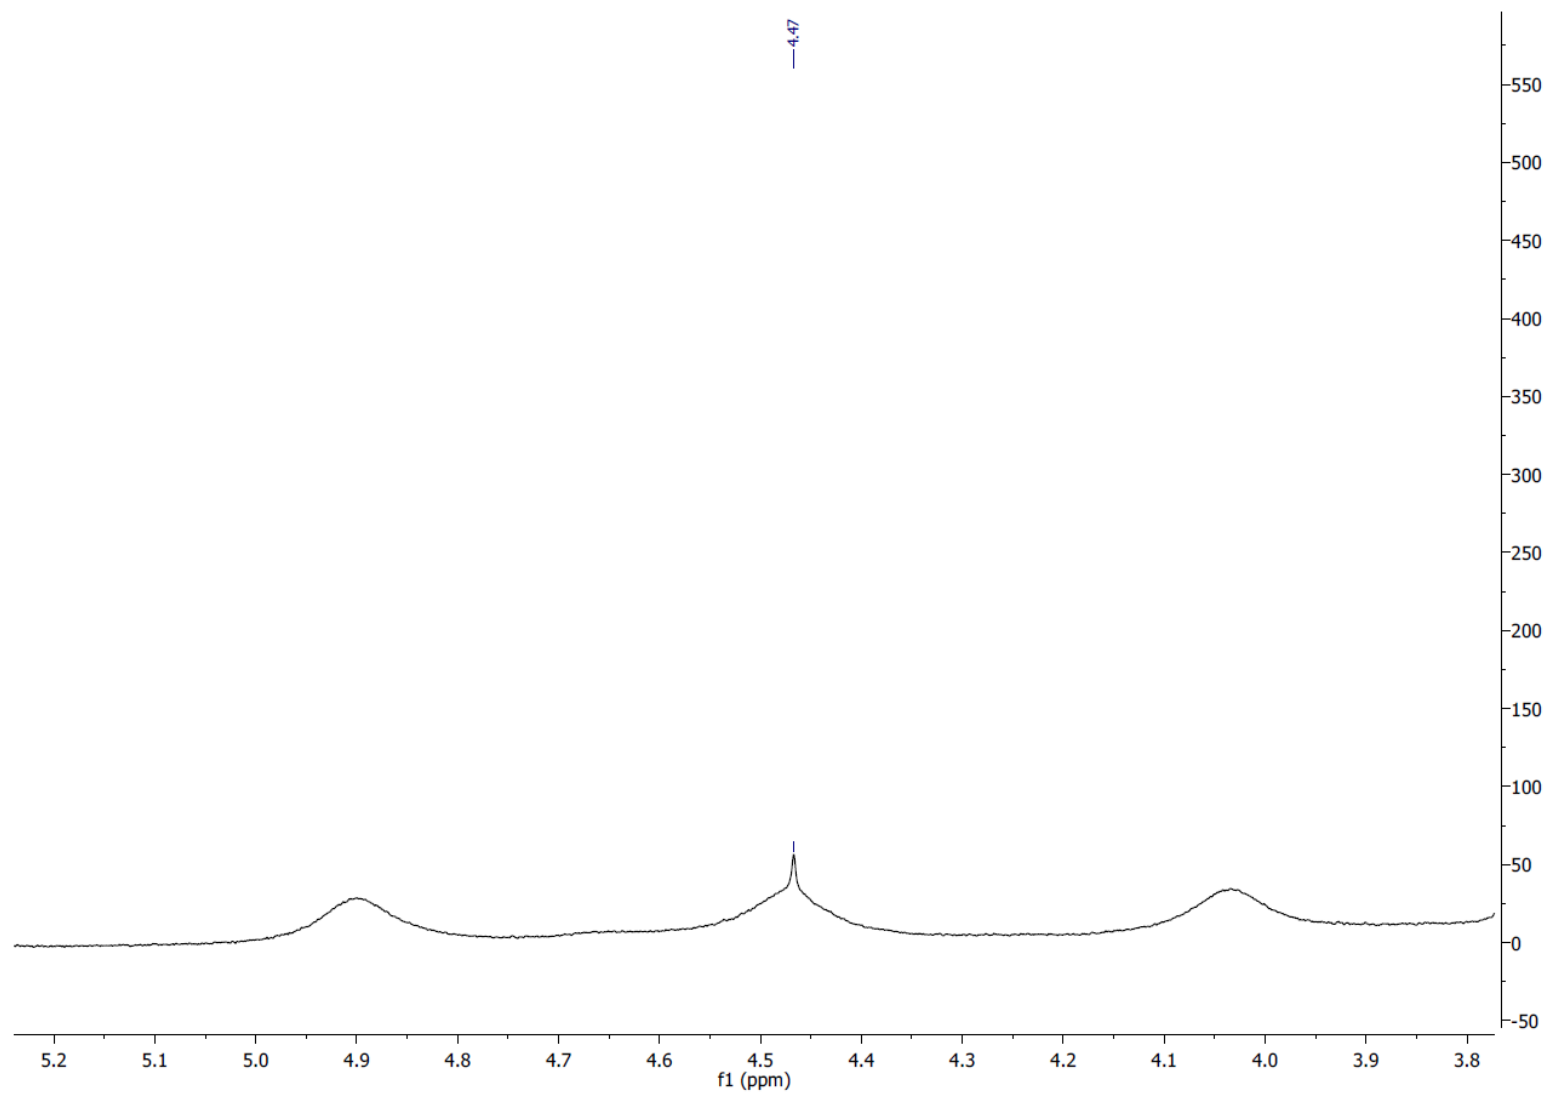

**Figure S55:** <sup>1</sup>H NMR (400 MHz, 298 K, C<sub>6</sub>D<sub>6</sub>/THF 9:1) of Fe(Cl)<sub>2</sub>(dmpe)<sub>2</sub> (**1**) (9.6 μmol) treated by 2 equiv. of K(hmde) (premix 3 days) and 10 equiv. of pinBH after 10 days upon photolysis (350 nm). It shows the presence of H<sub>2</sub> (s, 4.47 ppm) and starting pinBH.

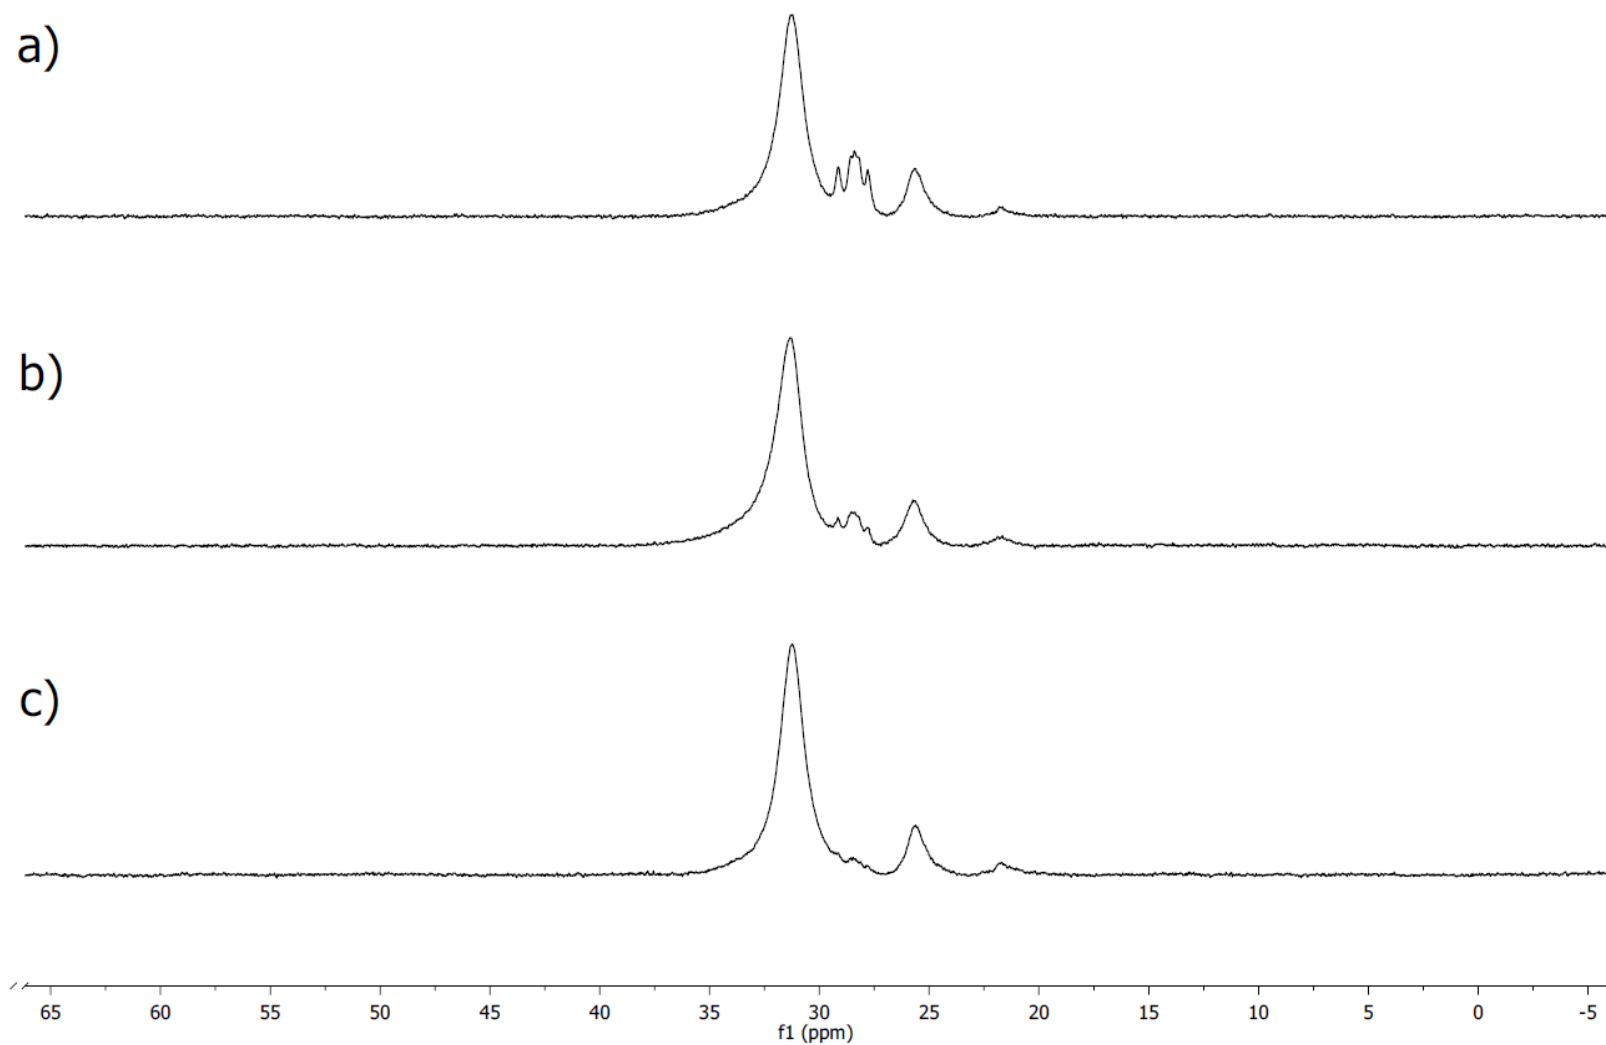

**Figure S56:**  $^{11}\text{B}$  NMR (128 MHz, 298 K,  $\text{C}_6\text{D}_6/\text{THF}$  9:1) of  $\text{Fe}(\text{Cl})_2(\text{dmpe})_2$  (**1**) (8.7  $\mu\text{mol}$ ) treated by 2 equiv. of  $\text{Li}(\text{hmds})$  (premix 3 days) and 10 equiv. of pinBH after 3 days (a), 4 days (b) and 6 days (c) upon photolysis (350 nm).



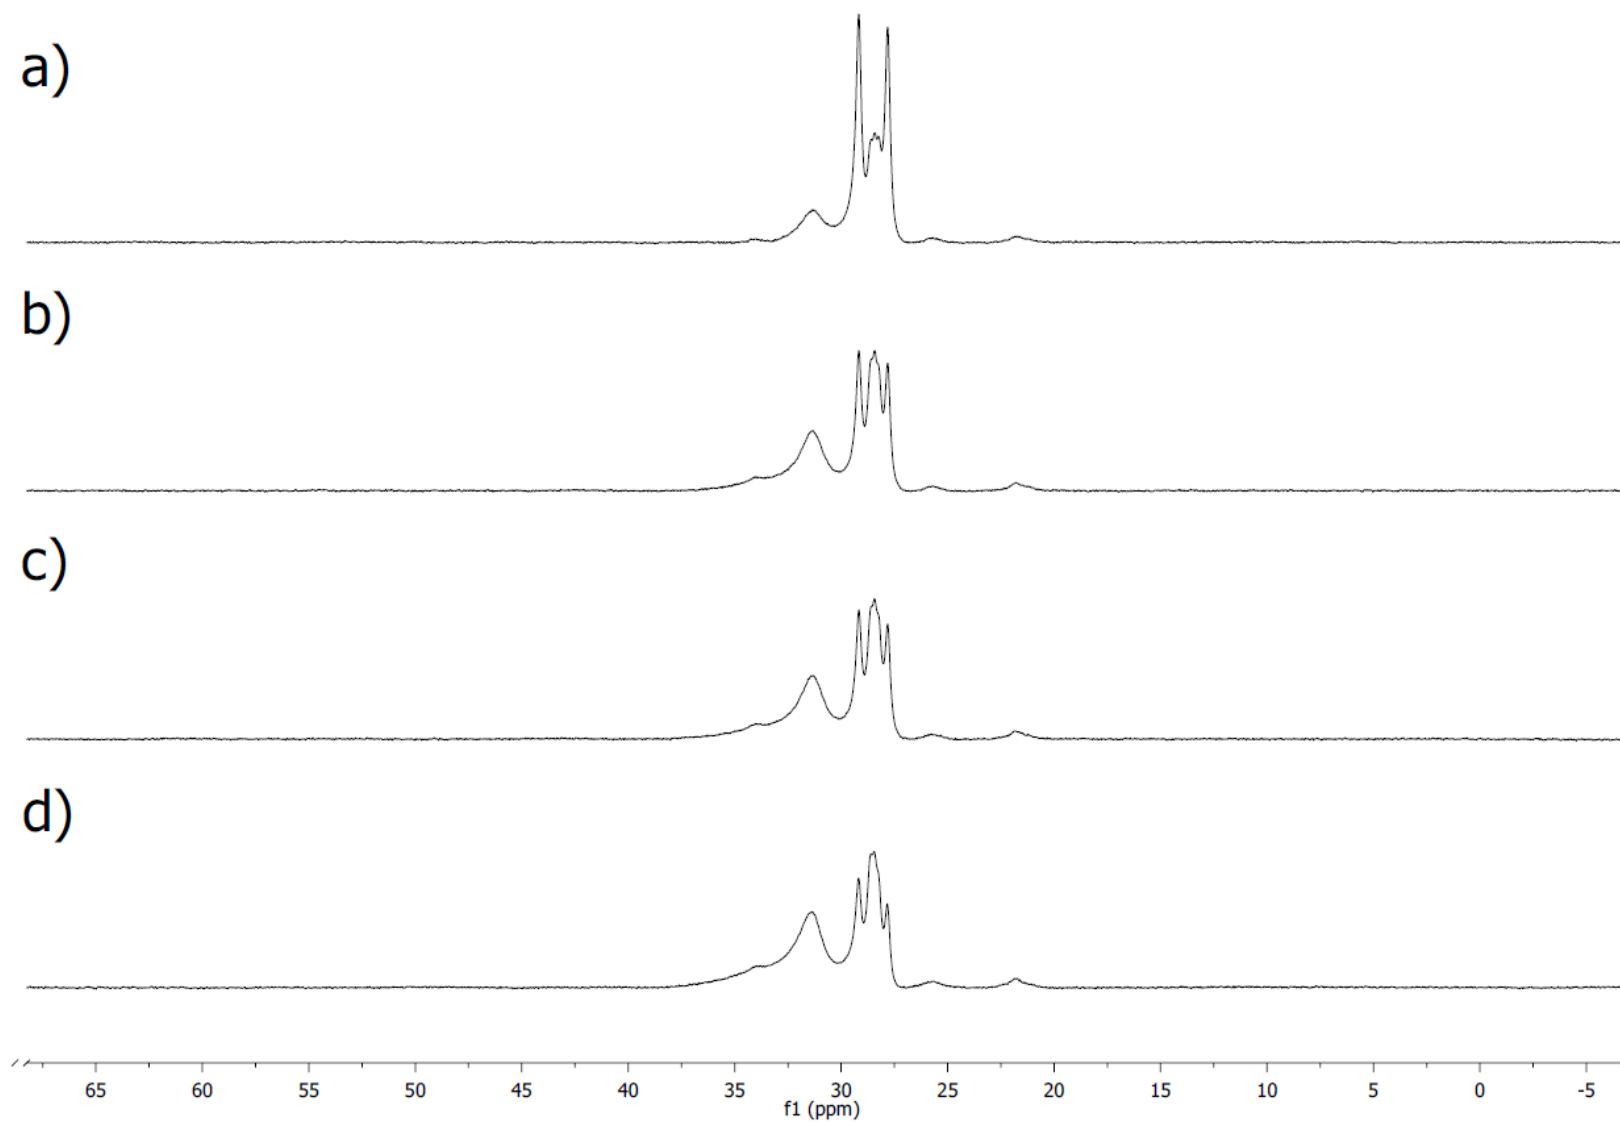

**Figure S57:**  $^{11}\text{B}$  NMR (128 MHz, 298 K,  $\text{C}_6\text{D}_6/\text{THF}$  9:1) of  $\text{Fe}(\text{Cl})_2(\text{dmpe})_2$  (**1**) (8.7  $\mu\text{mol}$ ) treated by 2 equiv. of  $\text{Na}(\text{hmds})$  (premix 3 days) and 10 equiv. of pinBH after 3 days (a), 6 days (b), 7 days (c) and 10 days (d) upon photolysis (350 nm).

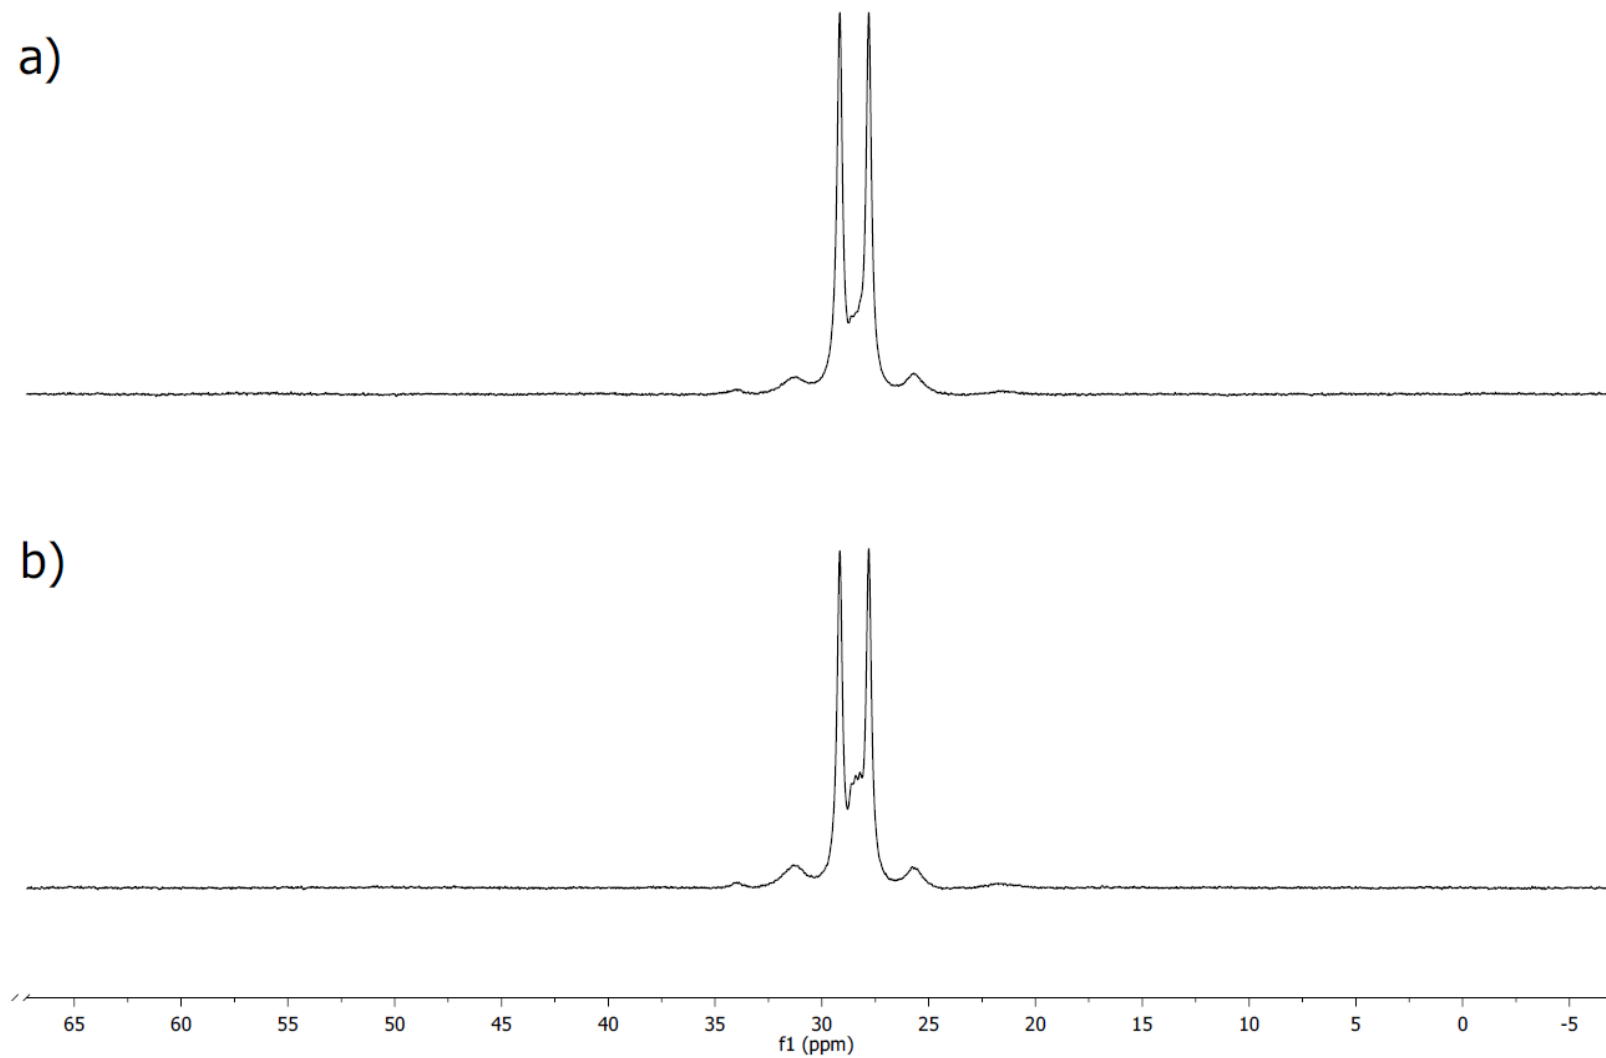

**Figure S58:**  $^{11}\text{B}$  NMR (128 MHz, 298 K,  $\text{C}_6\text{D}_6/\text{THF}$  9:1) of  $\text{Fe}(\text{Cl})_2(\text{dmpe})_2$  (**1**) (9.6  $\mu\text{mol}$ ) treated by 2 equiv. of  $\text{K}(\text{hmds})$  (premix 3 days) and 10 equiv. of pinBH after 4 days (a) and 10 days (b) upon photolysis (350 nm).

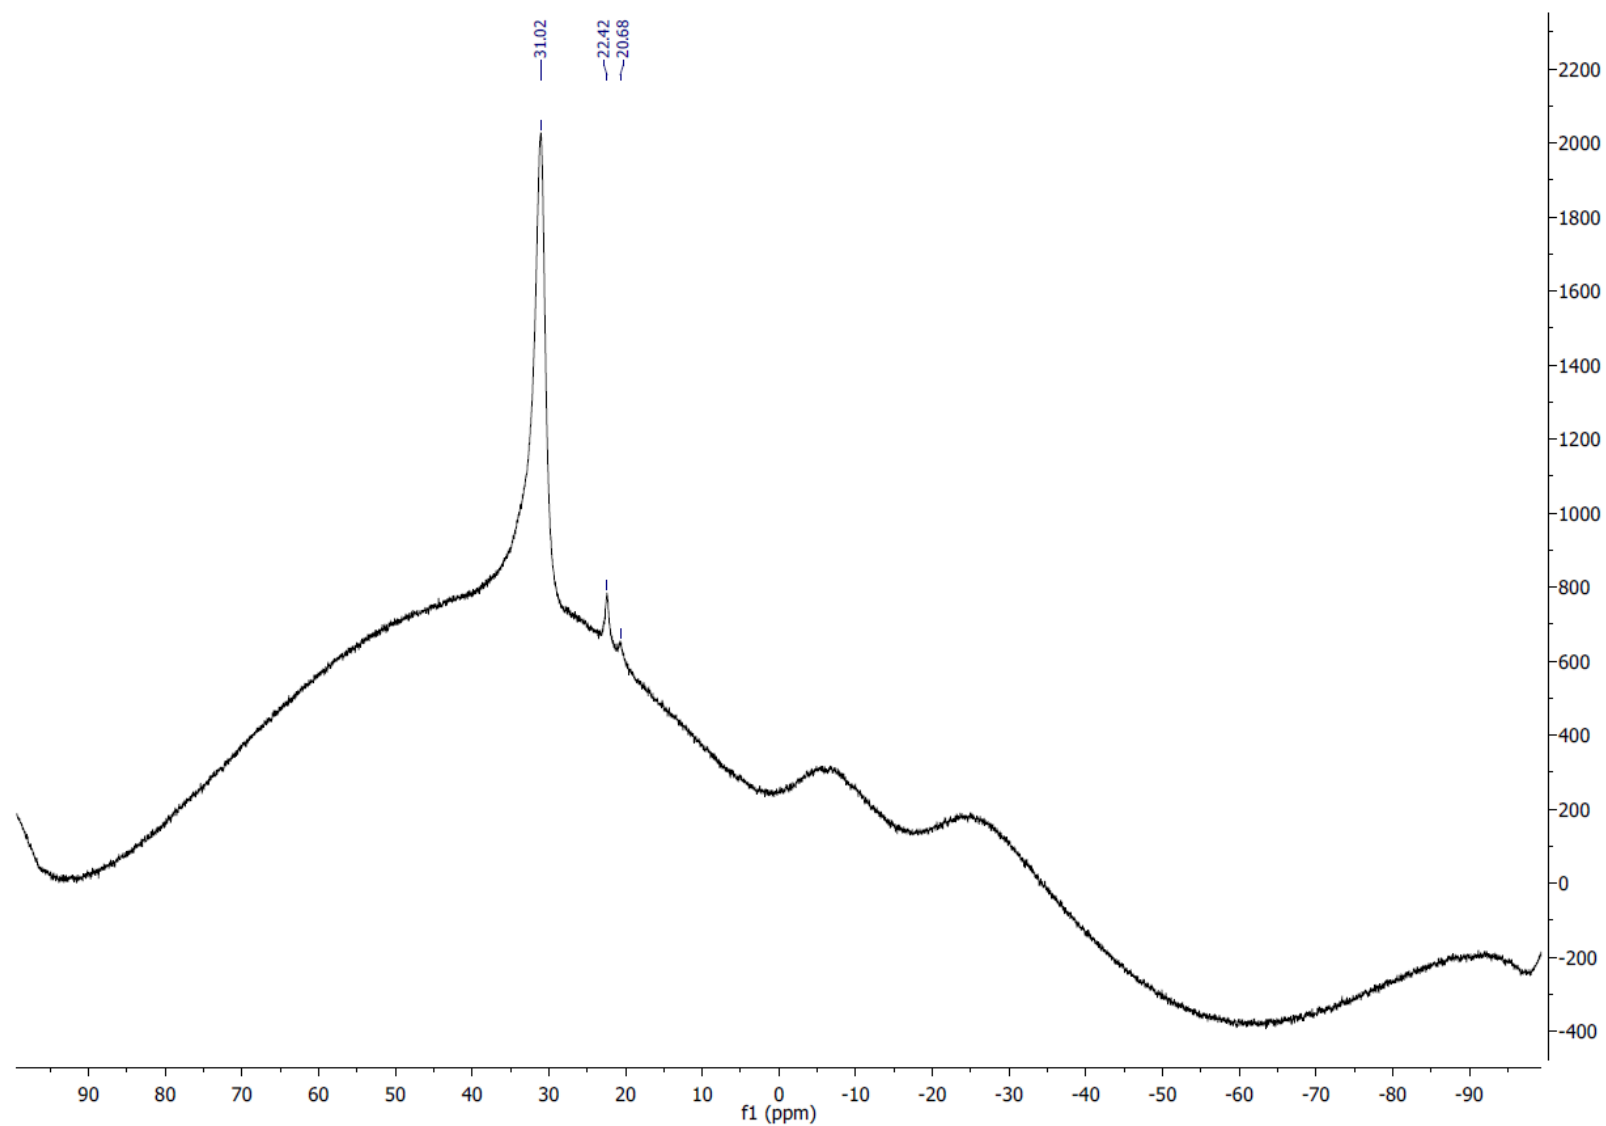

**Figure S59:**  $^{11}\text{B}$  NMR (128 MHz, 298 K,  $\text{CDCl}_3$ ) of  $\text{Fe}(\text{Cl})_2(\text{dmpe})_2$  (**1**) (8.4  $\mu\text{mol}$ ) treated by 2 equiv. of  $\text{Li}(\text{hmds})$  (premix 3 days) and 10 equiv. of pinBH after 10 days upon photolysis (350 nm), quench with  $\text{H}_2\text{O}$ , extraction with MTBE and evaporation of the solvent.

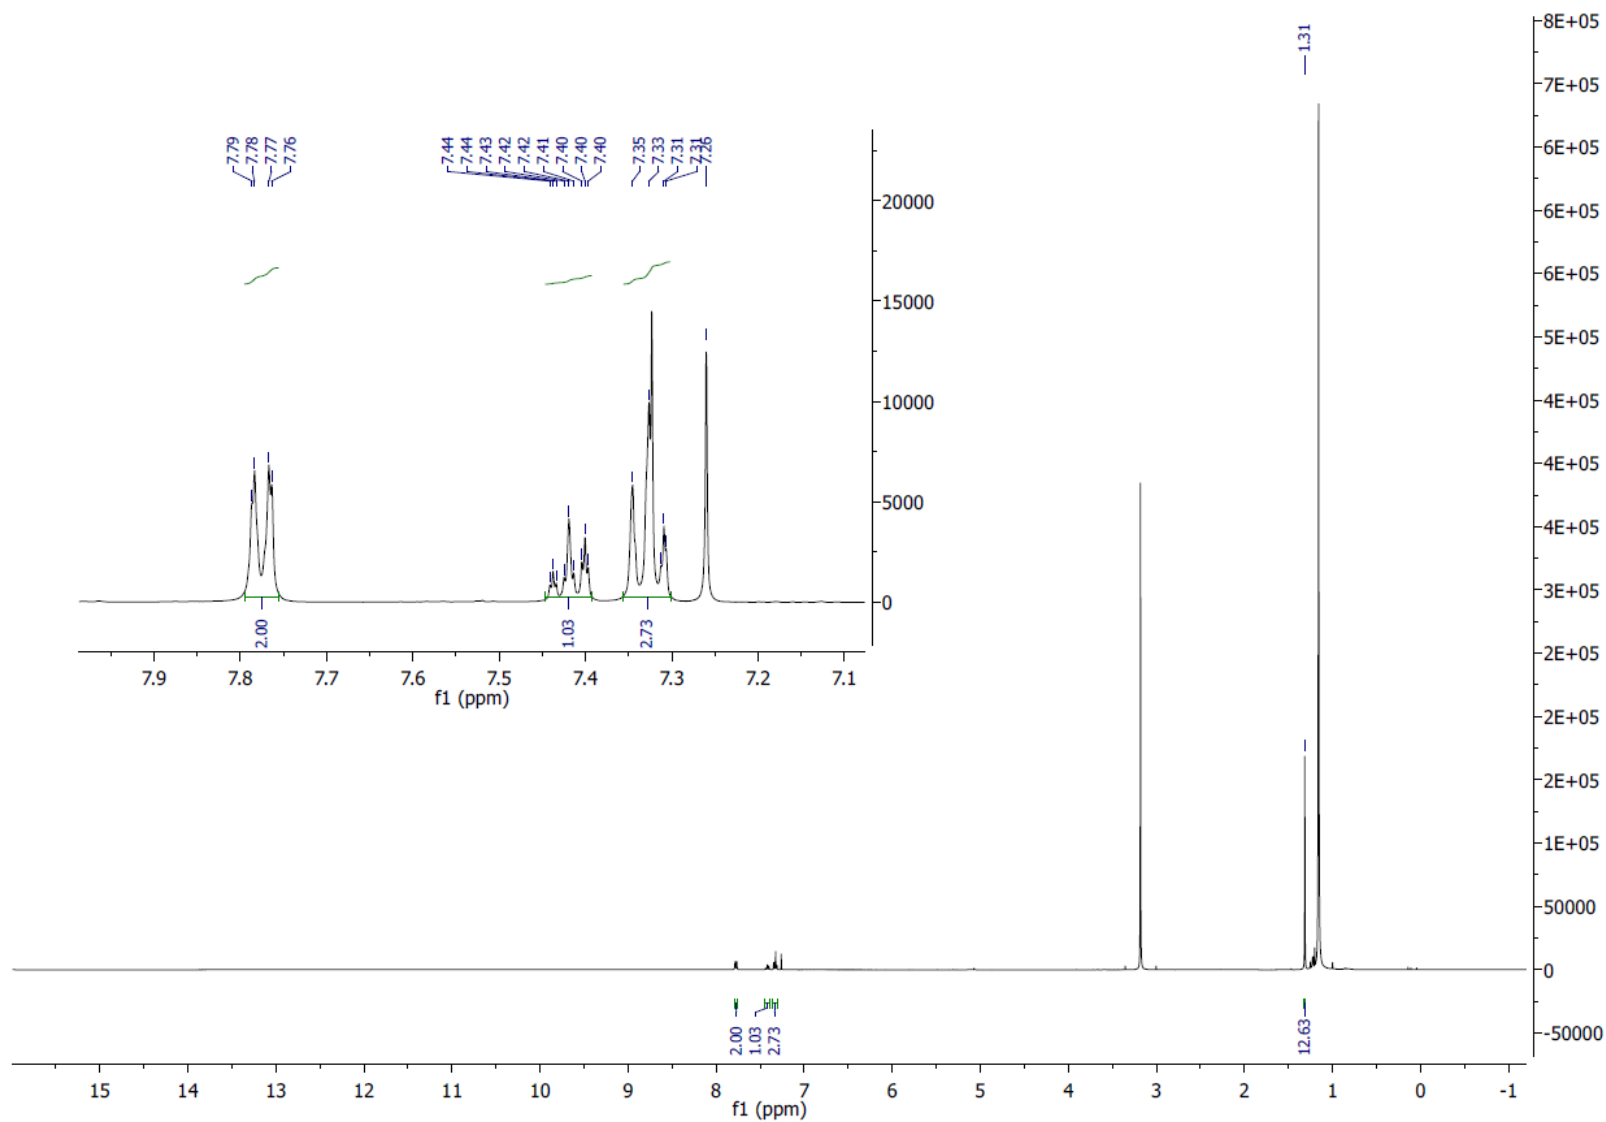

**Figure S60:**  $^1\text{H}$  NMR (400 MHz, 298 K,  $\text{CDCl}_3$ ) of  $\text{Fe}(\text{Cl})_2(\text{dmpe})_2$  (**1**) (8.4  $\mu\text{mol}$ ) treated by 2 equiv. of  $\text{Li}(\text{hmds})$  (premix 3 days) and 10 equiv. of  $\text{pinBH}$  after 10 days upon photolysis (350 nm), quench with  $\text{H}_2\text{O}$ , extraction with MTBE and evaporation of the solvent.

## 6) Crystallography

PhMgBr (THF solution, 1M) was added by 0.25 equiv. aliquots to a solution of **1** in benzene at -30°C; the solution was left at RT overnight. The solution was concentrated under vacuo (ca. 3 mL) in the glovebox, and was layered with 3 mL of *n*-pentane. This was placed in the glovebox freezer at -35°C for 3 days, allowing the formation of red crystals trapped in the frozen benzene.

A red block-like single crystal of compound **2<sub>Ph</sub>** was selected, mounted onto a cryoloop, and transferred in the cold nitrogen gas stream of an Oxford Cryostream. Intensity data were collected with a BRUKER Kappa-APEXII diffractometer with micro-focused Cu-K $\alpha$  radiation ( $\lambda=1.54178$  Å) at 200K. APEX 3 suite and SAINT program (BRUKER) were used to carry out data collection, unit-cell parameters refinement, integration and data reduction. SADABS (BRUKER) was used for scaling and multi-scan absorption corrections. In the Olex2 suite, [R9] the structure was solved with SHELXT-14 program [R10] and refined by full-matrix least-squares methods using SHELXL-17.[R11] All non-hydrogen atoms were refined anisotropically. Hydrogen atoms, although visible on the Fourier difference map, were placed at calculated positions and refined with a riding model.

CCDC 2248606 contain the supplementary crystallographic data for this paper. The data can be obtained free of charge from The Cambridge Crystallographic Data Centre via [www.ccdc.cam.ac.uk/structures](http://www.ccdc.cam.ac.uk/structures).

**Table 1 Crystal data and structure refinement for vw479\_0m.**

|                                  |                                                    |
|----------------------------------|----------------------------------------------------|
| Identification code              | vw479_0m                                           |
| Empirical formula                | C <sub>24</sub> H <sub>43</sub> BrFeP <sub>4</sub> |
| Formula weight                   | 591.22                                             |
| Temperature/K                    | 200.0                                              |
| Crystal system                   | monoclinic                                         |
| Space group                      | P2 <sub>1</sub> /c                                 |
| a/Å                              | 9.4919(7)                                          |
| b/Å                              | 13.0523(9)                                         |
| c/Å                              | 22.5297(15)                                        |
| $\alpha$ /°                      | 90                                                 |
| $\beta$ /°                       | 92.497(3)                                          |
| $\gamma$ /°                      | 90                                                 |
| Volume/Å <sup>3</sup>            | 2788.6(3)                                          |
| Z                                | 4                                                  |
| $\rho_{\text{calc}}/\text{cm}^3$ | 1.408                                              |
| $\mu/\text{mm}^{-1}$             | 8.249                                              |
| F(000)                           | 1232.0                                             |
| Crystal size/mm <sup>3</sup>     | 0.25 × 0.15 × 0.12                                 |
| Radiation                        | CuK $\alpha$ ( $\lambda = 1.54178$ )               |

|                                                  |                                                               |
|--------------------------------------------------|---------------------------------------------------------------|
| 2 $\theta$ range for data collection/ $^{\circ}$ | 7.83 to 136.87                                                |
| Index ranges                                     | $-8 \leq h \leq 11, -15 \leq k \leq 15, -27 \leq l \leq 26$   |
| Reflections collected                            | 32155                                                         |
| Independent reflections                          | 5121 [ $R_{\text{int}} = 0.0359, R_{\text{sigma}} = 0.0243$ ] |
| Data/restraints/parameters                       | 5121/0/280                                                    |
| Goodness-of-fit on $F^2$                         | 1.132                                                         |
| Final R indexes [ $I \geq 2\sigma(I)$ ]          | $R_1 = 0.0429, wR_2 = 0.1139$                                 |
| Final R indexes [all data]                       | $R_1 = 0.0453, wR_2 = 0.1156$                                 |
| Largest diff. peak/hole / $e \text{ \AA}^{-3}$   | 0.43/-1.14                                                    |

**Table 2 Fractional Atomic Coordinates ( $\times 10^4$ ) and Equivalent Isotropic Displacement Parameters ( $\text{\AA}^2 \times 10^3$ ) for vw479\_0m.  $U_{\text{eq}}$  is defined as 1/3 of the trace of the orthogonalised  $U_{ij}$  tensor.**

| Atom | <i>x</i>    | <i>y</i>   | <i>z</i>    | $U(\text{eq})$ |
|------|-------------|------------|-------------|----------------|
| Br1  | 6984.5 (6)  | 1564.8 (4) | 2569.1 (2)  | 47.94 (17)     |
| Fe1  | 7190.7 (6)  | 2124.2 (4) | 3665.1 (2)  | 18.72 (15)     |
| P1   | 8932.3 (10) | 3161.3 (8) | 3400.5 (4)  | 28.0 (2)       |
| P2   | 5755.6 (10) | 3442.3 (7) | 3428.9 (4)  | 24.0 (2)       |
| P3   | 8618.0 (10) | 783.2 (7)  | 3840.8 (4)  | 27.3 (2)       |
| P4   | 5426.3 (10) | 1046.1 (7) | 3828.8 (4)  | 24.8 (2)       |
| C1   | 7361 (3)    | 2571 (3)   | 4551.7 (14) | 17.0 (6)       |
| C2   | 7370 (4)    | 3592 (3)   | 4731.1 (16) | 27.5 (8)       |
| C3   | 7431 (4)    | 3901 (3)   | 5321.5 (18) | 33.2 (9)       |
| C4   | 7483 (4)    | 3186 (4)   | 5777.2 (17) | 35.8 (10)      |
| C5   | 7488 (4)    | 2169 (4)   | 5620.1 (17) | 34.9 (9)       |
| C6   | 7436 (4)    | 1874 (3)   | 5024.5 (16) | 28.0 (8)       |
| C7   | 8153 (5)    | 4241 (3)   | 2977.0 (19) | 35.9 (9)       |
| C8   | 6812 (4)    | 4586 (3)   | 3271.8 (17) | 32.2 (9)       |
| C9   | 10093 (5)   | 3806 (4)   | 3949 (2)    | 45.8 (11)      |
| C10  | 10262 (5)   | 2723 (4)   | 2891 (2)    | 47.4 (12)      |
| C11  | 4447 (5)    | 3934 (4)   | 3932 (2)    | 39.1 (10)      |
| C12  | 4639 (5)    | 3416 (4)   | 2745 (2)    | 43.8 (11)      |
| C13  | 7603 (5)    | -305 (3)   | 4137.4 (18) | 34.5 (9)       |
| C14  | 6124 (5)    | -274 (3)   | 3844.5 (19) | 36.2 (9)       |
| C15  | 10171 (4)   | 890 (4)    | 4348 (2)    | 40.9 (10)      |
| C16  | 9433 (6)    | 111 (4)    | 3231 (2)    | 48.9 (12)      |
| C17  | 4406 (4)    | 1117 (3)   | 4498.2 (18) | 34.7 (9)       |
| C18  | 3941 (5)    | 894 (4)    | 3291 (2)    | 44.1 (11)      |
| C19  | 7557 (5)    | 6704 (4)   | 4633.0 (19) | 40.4 (10)      |
| C20  | 8821 (5)    | 6758 (4)   | 4359.3 (19) | 39.2 (10)      |
| C21  | 8832 (4)    | 6964 (3)   | 3758.9 (19) | 36.8 (9)       |

**Table 2 Fractional Atomic Coordinates ( $\times 10^4$ ) and Equivalent Isotropic Displacement Parameters ( $\text{\AA}^2 \times 10^3$ ) for vw479\_0m.  $U_{eq}$  is defined as 1/3 of the trace of the orthogonalised  $U_{ij}$  tensor.**

| Atom | x        | y        | z           | U(eq)    |
|------|----------|----------|-------------|----------|
| C22  | 7579 (5) | 7127 (3) | 3441.7 (19) | 37.4 (9) |
| C23  | 6314 (4) | 7074 (3) | 3719 (2)    | 35.4 (9) |
| C24  | 6299 (4) | 6862 (3) | 4317 (2)    | 36.7 (9) |

**Table 3 Anisotropic Displacement Parameters ( $\text{\AA}^2 \times 10^3$ ) for vw479\_0m. The Anisotropic displacement factor exponent takes the form:  $-2\pi^2[h^2a^{*2}U_{11}+2hka^*b^*U_{12}+\dots]$ .**

| Atom | U <sub>11</sub> | U <sub>22</sub> | U <sub>33</sub> | U <sub>23</sub> | U <sub>13</sub> | U <sub>12</sub> |
|------|-----------------|-----------------|-----------------|-----------------|-----------------|-----------------|
| Br1  | 62.7 (3)        | 55.4 (3)        | 25.6 (2)        | -6.8 (2)        | 0.5 (2)         | 9.9 (2)         |
| Fe1  | 23.9 (3)        | 18.7 (3)        | 13.7 (3)        | -0.49 (19)      | 2.4 (2)         | 3.1 (2)         |
| P1   | 27.9 (5)        | 33.5 (5)        | 23.2 (5)        | 5.0 (4)         | 7.8 (4)         | 1.0 (4)         |
| P2   | 28.3 (5)        | 24.3 (5)        | 19.3 (4)        | 2.0 (3)         | -0.3 (3)        | 6.1 (4)         |
| P3   | 32.0 (5)        | 26.4 (5)        | 23.8 (5)        | 0.5 (4)         | 5.1 (4)         | 10.2 (4)        |
| P4   | 28.7 (5)        | 22.7 (5)        | 22.9 (4)        | -3.3 (4)        | -0.4 (4)        | -2.0 (4)        |
| C1   | 14.6 (14)       | 22.7 (17)       | 13.7 (15)       | -0.2 (13)       | 2.6 (11)        | 0.6 (12)        |
| C2   | 30.2 (19)       | 30 (2)          | 22.3 (18)       | -2.0 (15)       | 1.7 (14)        | 2.9 (15)        |
| C3   | 30.3 (19)       | 37 (2)          | 32 (2)          | -15.6 (17)      | 2.1 (16)        | -0.9 (17)       |
| C4   | 27.4 (19)       | 62 (3)          | 17.9 (18)       | -11.3 (18)      | 1.0 (14)        | 1.8 (19)        |
| C5   | 32 (2)          | 53 (3)          | 20.1 (18)       | 6.9 (17)        | 0.2 (15)        | 0.7 (18)        |
| C6   | 31.7 (19)       | 32 (2)          | 20.6 (18)       | 0.7 (15)        | 0.8 (15)        | 1.0 (16)        |
| C7   | 44 (2)          | 30 (2)          | 34 (2)          | 10.3 (17)       | 8.8 (18)        | 0.4 (18)        |
| C8   | 44 (2)          | 24.2 (19)       | 27.9 (19)       | 9.8 (15)        | 3.1 (17)        | 4.7 (17)        |
| C9   | 36 (2)          | 58 (3)          | 44 (3)          | 2 (2)           | 4.5 (19)        | -11 (2)         |
| C10  | 40 (2)          | 59 (3)          | 44 (3)          | 8 (2)           | 22 (2)          | 7 (2)           |
| C11  | 38 (2)          | 43 (2)          | 37 (2)          | 1.9 (19)        | 7.0 (18)        | 11.1 (19)       |
| C12  | 49 (3)          | 47 (3)          | 34 (2)          | 4.0 (19)        | -14.9 (19)      | 8 (2)           |
| C13  | 47 (2)          | 22.3 (19)       | 34 (2)          | 1.2 (16)        | 3.8 (18)        | 7.6 (17)        |
| C14  | 50 (2)          | 20.2 (19)       | 38 (2)          | -4.8 (16)       | 0.4 (19)        | -1.3 (17)       |
| C15  | 31 (2)          | 51 (3)          | 41 (2)          | 11 (2)          | 1.6 (18)        | 11.9 (19)       |
| C16  | 64 (3)          | 43 (3)          | 41 (2)          | -2 (2)          | 18 (2)          | 24 (2)          |
| C17  | 33 (2)          | 38 (2)          | 33 (2)          | 0.9 (17)        | 6.9 (17)        | -6.3 (17)       |
| C18  | 45 (2)          | 48 (3)          | 38 (2)          | -4 (2)          | -11.0 (19)      | -9 (2)          |
| C19  | 37 (2)          | 53 (3)          | 31 (2)          | 2.5 (19)        | 1.3 (17)        | 3 (2)           |
| C20  | 32 (2)          | 50 (3)          | 35 (2)          | 1.6 (19)        | -3.0 (17)       | 5.7 (19)        |
| C21  | 32 (2)          | 40 (2)          | 38 (2)          | 1.3 (18)        | 5.2 (17)        | 0.2 (18)        |
| C22  | 47 (2)          | 33 (2)          | 32 (2)          | 5.1 (17)        | -2.1 (18)       | -1.7 (18)       |
| C23  | 36 (2)          | 25 (2)          | 44 (2)          | -1.7 (17)       | -7.9 (18)       | -1.2 (16)       |

**Table 3 Anisotropic Displacement Parameters ( $\text{\AA}^2 \times 10^3$ ) for vw479\_0m. The Anisotropic displacement factor exponent takes the form:  $-2\pi^2[h^2a^{*2}U_{11}+2hka^*b^*U_{12}+\dots]$ .**

| Atom | U <sub>11</sub> | U <sub>22</sub> | U <sub>33</sub> | U <sub>23</sub> | U <sub>13</sub> | U <sub>12</sub> |
|------|-----------------|-----------------|-----------------|-----------------|-----------------|-----------------|
| C24  | 31 (2)          | 36 (2)          | 43 (2)          | -5.2 (19)       | 4.3 (17)        | 0.8 (17)        |

**Table 4 Bond Lengths for vw479\_0m.**

| Atom | Atom | Length/ $\text{\AA}$ | Atom | Atom | Length/ $\text{\AA}$ |
|------|------|----------------------|------|------|----------------------|
| Br1  | Fe1  | 2.5742 (7)           | P4   | C17  | 1.830 (4)            |
| Fe1  | P1   | 2.2375 (11)          | P4   | C18  | 1.829 (4)            |
| Fe1  | P2   | 2.2439 (10)          | C1   | C2   | 1.392 (5)            |
| Fe1  | P3   | 2.2381 (11)          | C1   | C6   | 1.401 (5)            |
| Fe1  | P4   | 2.2304 (11)          | C2   | C3   | 1.389 (5)            |
| Fe1  | C1   | 2.081 (3)            | C3   | C4   | 1.386 (6)            |
| P1   | C7   | 1.839 (4)            | C4   | C5   | 1.374 (6)            |
| P1   | C9   | 1.825 (5)            | C5   | C6   | 1.395 (5)            |
| P1   | C10  | 1.834 (4)            | C7   | C8   | 1.530 (6)            |
| P2   | C8   | 1.841 (4)            | C13  | C14  | 1.525 (6)            |
| P2   | C11  | 1.834 (4)            | C19  | C20  | 1.374 (6)            |
| P2   | C12  | 1.833 (4)            | C19  | C24  | 1.379 (6)            |
| P3   | C13  | 1.857 (4)            | C20  | C21  | 1.380 (6)            |
| P3   | C15  | 1.830 (4)            | C21  | C22  | 1.377 (6)            |
| P3   | C16  | 1.830 (4)            | C22  | C23  | 1.380 (6)            |
| P4   | C14  | 1.845 (4)            | C23  | C24  | 1.376 (6)            |

**Table 5 Bond Angles for vw479\_0m.**

| Atom | Atom | Atom | Angle/ $^\circ$ | Atom | Atom | Atom | Angle/ $^\circ$ |
|------|------|------|-----------------|------|------|------|-----------------|
| P1   | Fe1  | Br1  | 86.69 (3)       | C15  | P3   | C13  | 104.5 (2)       |
| P1   | Fe1  | P2   | 85.46 (4)       | C16  | P3   | Fe1  | 120.95 (16)     |
| P1   | Fe1  | P3   | 94.11 (4)       | C16  | P3   | C13  | 98.4 (2)        |
| P2   | Fe1  | Br1  | 88.28 (3)       | C16  | P3   | C15  | 98.6 (2)        |
| P3   | Fe1  | Br1  | 88.17 (3)       | C14  | P4   | Fe1  | 108.69 (15)     |
| P3   | Fe1  | P2   | 176.44 (4)      | C17  | P4   | Fe1  | 122.17 (14)     |
| P4   | Fe1  | Br1  | 87.33 (3)       | C17  | P4   | C14  | 103.5 (2)       |
| P4   | Fe1  | P1   | 174.01 (4)      | C18  | P4   | Fe1  | 121.41 (16)     |
| P4   | Fe1  | P2   | 94.04 (4)       | C18  | P4   | C14  | 100.2 (2)       |
| P4   | Fe1  | P3   | 86.01 (4)       | C18  | P4   | C17  | 97.6 (2)        |
| C1   | Fe1  | Br1  | 179.80 (10)     | C2   | C1   | Fe1  | 123.1 (2)       |
| C1   | Fe1  | P1   | 93.37 (9)       | C2   | C1   | C6   | 113.7 (3)       |



**Table 5 Bond Angles for vw479\_0m.**

| Atom | Atom | Atom | Angle/°     | Atom | Atom | Atom | Angle/°   |
|------|------|------|-------------|------|------|------|-----------|
| C1   | Fe1  | P2   | 91.92 (9)   | C6   | C1   | Fe1  | 123.1 (3) |
| C1   | Fe1  | P3   | 91.63 (9)   | C3   | C2   | C1   | 123.7 (4) |
| C1   | Fe1  | P4   | 92.61 (9)   | C4   | C3   | C2   | 120.9 (4) |
| C7   | P1   | Fe1  | 108.46 (14) | C5   | C4   | C3   | 117.4 (3) |
| C9   | P1   | Fe1  | 122.00 (15) | C4   | C5   | C6   | 121.0 (4) |
| C9   | P1   | C7   | 102.4 (2)   | C5   | C6   | C1   | 123.4 (4) |
| C9   | P1   | C10  | 99.0 (2)    | C8   | C7   | P1   | 108.9 (3) |
| C10  | P1   | Fe1  | 120.98 (18) | C7   | C8   | P2   | 108.3 (3) |
| C10  | P1   | C7   | 100.7 (2)   | C14  | C13  | P3   | 107.8 (3) |
| C8   | P2   | Fe1  | 109.72 (13) | C13  | C14  | P4   | 110.9 (3) |
| C11  | P2   | Fe1  | 122.82 (15) | C20  | C19  | C24  | 120.9 (4) |
| C11  | P2   | C8   | 102.9 (2)   | C19  | C20  | C21  | 119.6 (4) |
| C12  | P2   | Fe1  | 120.54 (16) | C22  | C21  | C20  | 119.7 (4) |
| C12  | P2   | C8   | 98.8 (2)    | C21  | C22  | C23  | 120.4 (4) |
| C12  | P2   | C11  | 98.3 (2)    | C24  | C23  | C22  | 120.0 (4) |
| C13  | P3   | Fe1  | 110.02 (13) | C23  | C24  | C19  | 119.4 (4) |
| C15  | P3   | Fe1  | 121.07 (16) |      |      |      |           |

**Table 6 Torsion Angles for vw479\_0m.**

| A   | B   | C   | D   | Angle/°    | A   | B   | C   | D   | Angle/°   |
|-----|-----|-----|-----|------------|-----|-----|-----|-----|-----------|
| Fe1 | P1  | C7  | C8  | 40.9 (3)   | C9  | P1  | C7  | C8  | -89.3 (3) |
| Fe1 | P2  | C8  | C7  | 34.4 (3)   | C10 | P1  | C7  | C8  | 168.9 (3) |
| Fe1 | P3  | C13 | C14 | 34.1 (3)   | C11 | P2  | C8  | C7  | 166.7 (3) |
| Fe1 | P4  | C14 | C13 | 36.8 (3)   | C12 | P2  | C8  | C7  | -92.6 (3) |
| Fe1 | C1  | C2  | C3  | 177.6 (3)  | C15 | P3  | C13 | C14 | 165.5 (3) |
| Fe1 | C1  | C6  | C5  | -177.1 (3) | C16 | P3  | C13 | C14 | -93.3 (3) |
| P1  | C7  | C8  | P2  | -46.9 (3)  | C17 | P4  | C14 | C13 | -94.5 (3) |
| P3  | C13 | C14 | P4  | -44.2 (3)  | C18 | P4  | C14 | C13 | 165.1 (3) |
| C1  | C2  | C3  | C4  | -0.2 (6)   | C19 | C20 | C21 | C22 | 0.9 (7)   |
| C2  | C1  | C6  | C5  | 1.2 (5)    | C20 | C19 | C24 | C23 | 0.1 (7)   |
| C2  | C3  | C4  | C5  | 0.7 (6)    | C20 | C21 | C22 | C23 | -0.7 (7)  |
| C3  | C4  | C5  | C6  | -0.3 (6)   | C21 | C22 | C23 | C24 | 0.2 (6)   |
| C4  | C5  | C6  | C1  | -0.7 (6)   | C22 | C23 | C24 | C19 | 0.1 (6)   |
| C6  | C1  | C2  | C3  | -0.7 (5)   | C24 | C19 | C20 | C21 | -0.6 (7)  |

**Table 7 Hydrogen Atom Coordinates ( $\text{\AA}\times 10^4$ ) and Isotropic Displacement Parameters ( $\text{\AA}^2\times 10^3$ ) for vw479\_0m.**

| Atom | <i>x</i> | <i>y</i> | <i>z</i> | U(eq) |
|------|----------|----------|----------|-------|
| H2   | 7333.04  | 4106.99  | 4432.64  | 33    |
| H3   | 7437.5   | 4611.02  | 5414.39  | 40    |
| H4   | 7513.81  | 3391.81  | 6182.12  | 43    |
| H5   | 7528.14  | 1659.37  | 5921.52  | 42    |
| H6   | 7452.68  | 1162.57  | 4934.88  | 34    |
| H7A  | 8833.85  | 4814.5   | 2969.55  | 43    |
| H7B  | 7924.07  | 4026.58  | 2562.36  | 43    |
| H8A  | 6264.43  | 5055.01  | 3004.25  | 39    |
| H8B  | 7058.75  | 4956.04  | 3645.66  | 39    |
| H9A  | 10576.97 | 3294.37  | 4201.93  | 69    |
| H9B  | 9532.93  | 4257.45  | 4194.34  | 69    |
| H9C  | 10790.99 | 4213.81  | 3744.65  | 69    |
| H10A | 10767.89 | 3316.16  | 2739.09  | 71    |
| H10B | 9796.85  | 2353.8   | 2557.96  | 71    |
| H10C | 10930.4  | 2266.29  | 3102.55  | 71    |
| H11A | 3630.1   | 3474.64  | 3925.66  | 59    |
| H11B | 4145.87  | 4619.76  | 3803.54  | 59    |
| H11C | 4867.32  | 3969.95  | 4337     | 59    |
| H12A | 5222.68  | 3278.8   | 2405.37  | 66    |
| H12B | 4168.39  | 4079.92  | 2689.71  | 66    |
| H12C | 3927.99  | 2875.77  | 2772.86  | 66    |
| H13A | 8069.05  | -961.55  | 4046.48  | 41    |
| H13B | 7552.88  | -243.9   | 4574     | 41    |
| H14A | 5490.23  | -720.02  | 4067.24  | 43    |
| H14B | 6152.77  | -539.19  | 3433.56  | 43    |
| H15A | 10894.7  | 1299.18  | 4160.36  | 61    |
| H15B | 10544.29 | 204.07   | 4437.28  | 61    |
| H15C | 9906.86  | 1222.31  | 4716.41  | 61    |
| H16A | 8695.57  | -141.02  | 2949.58  | 73    |
| H16B | 9986.78  | -468.28  | 3389.5   | 73    |
| H16C | 10051.79 | 583.15   | 3026.33  | 73    |
| H17A | 3928.68  | 1782.2   | 4512.19  | 52    |
| H17B | 5040.18  | 1040.37  | 4850.37  | 52    |
| H17C | 3702.07  | 567.58   | 4490.67  | 52    |
| H18A | 3455.96  | 247.38   | 3365.9   | 66    |
| H18B | 4289.98  | 888.04   | 2887.68  | 66    |
| H18C | 3282.49  | 1465.71  | 3330.41  | 66    |
| H19  | 7550.48  | 6555.47  | 5045.7   | 49    |
| H20  | 9682.28  | 6654.02  | 4582.12  | 47    |

**Table 7 Hydrogen Atom Coordinates ( $\text{\AA}\times 10^4$ ) and Isotropic Displacement Parameters ( $\text{\AA}^2\times 10^3$ ) for vw479\_0m.**

| <b>Atom</b> | <b><i>x</i></b> | <b><i>y</i></b> | <b><i>z</i></b> | <b>U(eq)</b> |
|-------------|-----------------|-----------------|-----------------|--------------|
| H21         | 9700.01         | 6993.75         | 3565.08         | 44           |
| H22         | 7586.17         | 7276.27         | 3029.17         | 45           |
| H23         | 5452.83         | 7185.27         | 3497.44         | 42           |
| H24         | 5430.76         | 6823.85         | 4510.02         | 44           |

## 7) Mössbauer spectroscopy

All samples were prepared in an inert atmosphere glovebox equipped with a liquid nitrogen fill port to enable sample freezing to 77 K within the glovebox. Each sample was loaded into a Delrin Mössbauer sample cup for measurements and loaded under liquid nitrogen. Low temperature  $^{57}\text{Fe}$  Mössbauer measurements were performed using a See Co. MS4 Mössbauer spectrometer integrated with a Janis SVT-400T He/N<sub>2</sub> cryostat for measurements at 80 K. Isomer shifts were determined relative to  $\alpha\text{-Fe}$  at 298 K. All Mössbauer spectra were fit using the program WMoss (SeeCo). Errors of the fit analyses were the following:  $\delta \pm 0.02$  mm/s and  $\Delta\text{EQ} \pm 3\%$ . For multi-component fits the quantitation errors were  $\pm 3\%$  (e.g.  $70 \pm 3\%$ ).

## 8) References

[R1] Chatt, J.; Hayter, R. G. Some hydrido-complexes of iron(II). *J. Chem. Soc.* **1961**, 5507–5511. doi.org/10.1039/JR9610005507.

[R2] Tolman, C. A.; Ittel, S. D.; English, A. D.; Jesson, J. P. The chemistry of 2-naphthyl bis[bis(dimethylphosphino)ethane] hydride complexes of iron, ruthenium, and osmium. 1. Characterization and reactions with hydrogen and Lewis base ligands. *J. Am. Chem. Soc.* **1978**, *100*, 13, 4080–4089. doi.org/10.1021/ja00481a016.

[R3] Tolman, C. A.; Ittel, S. D.; English, A. D.; Jesson, J. P. Chemistry of 2-naphthyl bis[bis(dimethylphosphino)ethane] hydride complexes of iron, ruthenium, and osmium. 3. Cleavage of sp<sup>2</sup> carbon-hydrogen bonds. *J. Am. Chem. Soc.* **1979**, *101*, 7, 1742–1751. doi.org/10.1021/ja00501a017.

[R4] Maddock, L. C. H.; Cadenbach, T.; Kennedy, A. R.; Borilovic, I.; Aromí, G.; Hevia, E. Accessing Sodium Ferrate Complexes Containing Neutral and Anionic N-Heterocyclic Carbene Ligands: Structural, Synthetic, and Magnetic Insights. *Inorg. Chem.* **2015**, *54*, 18, 9201–9210. doi.org/10.1021/acs.inorgchem.5b01638.

[R5] Yang, C.-T.; Zhang, Z.-Q.; Liu, Y.-C.; Liu, L. Copper-Catalyzed Cross-Coupling Reaction of Organoboron Compounds with Primary Alkyl Halides and Pseudohalides. *Angew. Chem. Int. Ed.* **2011**, *50*, 3904–3907. doi.org/10.1002/anie.201008007.

[R6] Chen, K.; Chen, W.; Yi, X.; Chen, W.; Liu, M.; Wu, H. Sterically hindered N-heterocyclic carbene/palladium(II) catalyzed Suzuki–Miyaura coupling of nitrobenzenes. *Chem. Commun.* **2019**, *55*, 9287–9290. doi.org/10.1039/C9CC04634H.

[R7] Scherpf, T.; Steinert, H.; Großjohann, A.; Dilchert, K.; Tappen, J.; Rodstein, I.; Gessner, V. H. Efficient Pd-Catalyzed Direct Coupling of Aryl Chlorides with Alkylolithium Reagents. *Angew. Chem. Int. Ed.* **2020**, *59*, 20596–20603. doi.org/10.1002/anie.202008866.

**[R8]** Dombrey, T.; Werncke, C. G.; Jiang, S.; Grellier, M.; Vendier, L.; Bontemps, S.; Sortais, J.-B.; Sabo-Etienne, S.; Darcel, C. Iron-Catalyzed C–H Borylation of Arenes. *J. Am. Chem. Soc.* **2015**, *137*, 12, 4062–4065. doi.org/10.1021/jacs.5b00895.

**[R9]** O. V. Dolomanov, L. J. Bourhis, R. J. Gildea, J. A. K. Howard, H. Puschmann, *J. Appl. Cryst.* **2009**, *42*, 339–341.

**[R10]** G. M. Sheldrick, *Acta Crystallographica Section A* **2015**, *71*, 3–8.

**[R11]** G. M. Sheldrick, *Acta Crystallographica Section C* **2015**, *71*, 3–8.
